# Supplementary material
Source: publisher site journal article supplement (https://www.spandidos-publications.com/4603/downloadSupplementary)
Supplement: Supplementary file 1 [file downloadSupplementary]

## Sheet: out.bar_Gradient
Table SVIII. GO analysis down specific
id	num	pvalue	per	ratio	class	ID	Descrption	Pvalue	Qvalue	Up	Down	fg_num	bg_num
GO:0051173 positive regulation of nitrogen compound metabolic process	266	1.25095e-13	27.565	0.082	Biological Process	GO:0051173	positive regulation of nitrogen compound metabolic process	1.25095e-13	9.71862e-10	0	0	266	3231
GO:0009893 positive regulation of metabolic process	295	2.65549e-13	30.57	0.079	Biological Process	GO:0009893	positive regulation of metabolic process	2.65549e-13	1.03152e-09	0	0	295	3712
GO:0010604 positive regulation of macromolecule metabolic process	274	4.93171e-13	28.394	0.081	Biological Process	GO:0010604	positive regulation of macromolecule metabolic process	4.93171e-13	1.18317e-09	0	0	274	3395
GO:0031325 positive regulation of cellular metabolic process	274	6.09172e-13	28.394	0.081	Biological Process	GO:0031325	positive regulation of cellular metabolic process	6.09172e-13	1.18317e-09	0	0	274	3401
GO:0010557 positive regulation of macromolecule biosynthetic process	172	1.13057e-12	17.824	0.092	Biological Process	GO:0010557	positive regulation of macromolecule biosynthetic process	1.13057e-12	1.33661e-09	0	0	172	1864
GO:0030182 neuron differentiation	140	1.21781e-12	14.508	0.099	Biological Process	GO:0030182	neuron differentiation	1.21781e-12	1.33661e-09	0	0	140	1412
GO:0051254 positive regulation of RNA metabolic process	162	1.29803e-12	16.788	0.094	Biological Process	GO:0051254	positive regulation of RNA metabolic process	1.29803e-12	1.33661e-09	0	0	162	1723
GO:0031323 regulation of cellular metabolic process	449	1.53087e-12	46.528	0.071	Biological Process	GO:0031323	regulation of cellular metabolic process	1.53087e-12	1.33661e-09	0	0	449	6359
GO:0045893 positive regulation of transcription, DNA-templated	155	1.80198e-12	16.062	0.095	Biological Process	GO:0045893	positive regulation of transcription, DNA-templated	1.80198e-12	1.33661e-09	0	0	155	1630
GO:1903508 positive regulation of nucleic acid-templated transcription	155	1.80198e-12	16.062	0.095	Biological Process	GO:1903508	positive regulation of nucleic acid-templated transcription	1.80198e-12	1.33661e-09	0	0	155	1630
GO:1902680 positive regulation of RNA biosynthetic process	155	1.89248e-12	16.062	0.095	Biological Process	GO:1902680	positive regulation of RNA biosynthetic process	1.89248e-12	1.33661e-09	0	0	155	1631
GO:0080090 regulation of primary metabolic process	441	3.35382e-12	45.699	0.071	Biological Process	GO:0080090	regulation of primary metabolic process	3.35382e-12	2.17132e-09	0	0	441	6248
GO:0052696 flavonoid glucuronidation	9	4.01915e-12	0.933	1	Biological Process	GO:0052696	flavonoid glucuronidation	4.01915e-12	2.2778e-09	0	0	9	9
GO:0010628 positive regulation of gene expression	188	4.10467e-12	19.482	0.088	Biological Process	GO:0010628	positive regulation of gene expression	4.10467e-12	2.2778e-09	0	0	188	2128
GO:0048699 generation of neurons	149	6.16102e-12	15.44	0.095	Biological Process	GO:0048699	generation of neurons	6.16102e-12	3.191e-09	0	0	149	1570
GO:0045935 positive regulation of nucleobase-containing compound metabolic process	173	1.07799e-11	17.927	0.09	Biological Process	GO:0045935	positive regulation of nucleobase-containing compound metabolic process	1.07799e-11	5.23431e-09	0	0	173	1929
GO:0048522 positive regulation of cellular process	399	1.14917e-11	41.347	0.072	Biological Process	GO:0048522	positive regulation of cellular process	1.14917e-11	5.25172e-09	0	0	399	5566
GO:0009891 positive regulation of biosynthetic process	178	1.40868e-11	18.446	0.089	Biological Process	GO:0009891	positive regulation of biosynthetic process	1.40868e-11	5.90015e-09	0	0	178	2009
GO:0031328 positive regulation of cellular biosynthetic process	176	1.44295e-11	18.238	0.089	Biological Process	GO:0031328	positive regulation of cellular biosynthetic process	1.44295e-11	5.90015e-09	0	0	176	1980
GO:0022008 neurogenesis	155	1.53142e-11	16.062	0.093	Biological Process	GO:0022008	neurogenesis	1.53142e-11	5.94882e-09	0	0	155	1675
GO:0019222 regulation of metabolic process	477	2.47793e-11	49.43	0.069	Biological Process	GO:0019222	regulation of metabolic process	2.47793e-11	9.16716e-09	0	0	477	6960
GO:0006357 regulation of transcription by RNA polymerase II	217	1.1116e-10	22.487	0.082	Biological Process	GO:0006357	regulation of transcription by RNA polymerase II	1.1116e-10	3.92545e-08	0	0	217	2655
GO:0052697 xenobiotic glucuronidation	9	2.00129e-10	0.933	0.818	Biological Process	GO:0052697	xenobiotic glucuronidation	2.00129e-10	6.76e-08	0	0	9	11
GO:0045944 positive regulation of transcription by RNA polymerase II	118	2.12293e-10	12.228	0.098	Biological Process	GO:0045944	positive regulation of transcription by RNA polymerase II	2.12293e-10	6.87212e-08	0	0	118	1206
GO:0051252 regulation of RNA metabolic process	290	2.99179e-10	30.052	0.075	Biological Process	GO:0051252	regulation of RNA metabolic process	2.99179e-10	9.25907e-08	0	0	290	3853
GO:0006366 transcription by RNA polymerase II	225	3.09867e-10	23.316	0.08	Biological Process	GO:0006366	transcription by RNA polymerase II	3.09867e-10	9.25907e-08	0	0	225	2810
GO:0048518 positive regulation of biological process	437	3.52327e-10	45.285	0.069	Biological Process	GO:0048518	positive regulation of biological process	3.52327e-10	1.01379e-07	0	0	437	6360
GO:0007399 nervous system development	202	3.83956e-10	20.933	0.082	Biological Process	GO:0007399	nervous system development	3.83956e-10	1.06534e-07	0	0	202	2458
GO:0048523 negative regulation of cellular process	354	4.30417e-10	36.684	0.072	Biological Process	GO:0048523	negative regulation of cellular process	4.30417e-10	1.15307e-07	0	0	354	4934
GO:0009889 regulation of biosynthetic process	317	5.80703e-10	32.85	0.073	Biological Process	GO:0009889	regulation of biosynthetic process	5.80703e-10	1.50383e-07	0	0	317	4323
GO:0021953 central nervous system neuron differentiation	34	8.27527e-10	3.523	0.178	Biological Process	GO:0021953	central nervous system neuron differentiation	8.27527e-10	2.05236e-07	0	0	34	191
GO:0019219 regulation of nucleobase-containing compound metabolic process	308	8.45352e-10	31.917	0.074	Biological Process	GO:0019219	regulation of nucleobase-containing compound metabolic process	8.45352e-10	2.05236e-07	0	0	308	4187
GO:0051171 regulation of nitrogen compound metabolic process	418	1.01558e-09	43.316	0.069	Biological Process	GO:0051171	regulation of nitrogen compound metabolic process	1.01558e-09	2.39091e-07	0	0	418	6071
GO:0050793 regulation of developmental process	213	1.43161e-09	22.073	0.08	Biological Process	GO:0050793	regulation of developmental process	1.43161e-09	3.27124e-07	0	0	213	2668
GO:2000112 regulation of cellular macromolecule biosynthetic process	297	1.51638e-09	30.777	0.074	Biological Process	GO:2000112	regulation of cellular macromolecule biosynthetic process	1.51638e-09	3.36594e-07	0	0	297	4026
GO:0031326 regulation of cellular biosynthetic process	311	1.79864e-09	32.228	0.073	Biological Process	GO:0031326	regulation of cellular biosynthetic process	1.79864e-09	3.88157e-07	0	0	311	4265
GO:0010556 regulation of macromolecule biosynthetic process	298	2.43033e-09	30.881	0.073	Biological Process	GO:0010556	regulation of macromolecule biosynthetic process	2.43033e-09	5.10304e-07	0	0	298	4060
GO:0048468 cell development	181	2.76522e-09	18.756	0.083	Biological Process	GO:0048468	cell development	2.76522e-09	5.65341e-07	0	0	181	2191
GO:0030154 cell differentiation	312	3.87518e-09	32.332	0.072	Biological Process	GO:0030154	cell differentiation	3.87518e-09	7.71955e-07	0	0	312	4311
GO:0032502 developmental process	435	4.12071e-09	45.078	0.068	Biological Process	GO:0032502	developmental process	4.12071e-09	8.00344e-07	0	0	435	6430
GO:0048869 cellular developmental process	322	5.28436e-09	33.368	0.072	Biological Process	GO:0048869	cellular developmental process	5.28436e-09	1.00132e-06	0	0	322	4491
GO:0006464 cellular protein modification process	311	7.3067e-09	32.228	0.072	Biological Process	GO:0006464	cellular protein modification process	7.3067e-09	1.32013e-06	0	0	311	4319
GO:0036211 protein modification process	311	7.3067e-09	32.228	0.072	Biological Process	GO:0036211	protein modification process	7.3067e-09	1.32013e-06	0	0	311	4319
GO:0006355 regulation of transcription, DNA-templated	265	1.13707e-08	27.461	0.074	Biological Process	GO:0006355	regulation of transcription, DNA-templated	1.13707e-08	2.0077e-06	0	0	265	3573
GO:1903506 regulation of nucleic acid-templated transcription	265	1.2002e-08	27.461	0.074	Biological Process	GO:1903506	regulation of nucleic acid-templated transcription	1.2002e-08	2.07208e-06	0	0	265	3575
GO:0009059 macromolecule biosynthetic process	354	1.2859e-08	36.684	0.07	Biological Process	GO:0009059	macromolecule biosynthetic process	1.2859e-08	2.15468e-06	0	0	354	5071
GO:0048568 embryonic organ development	54	1.30351e-08	5.596	0.124	Biological Process	GO:0048568	embryonic organ development	1.30351e-08	2.15468e-06	0	0	54	436
GO:0007275 multicellular organism development	380	1.51771e-08	39.378	0.069	Biological Process	GO:0007275	multicellular organism development	1.51771e-08	2.45647e-06	0	0	380	5526
GO:2001141 regulation of RNA biosynthetic process	265	1.5701e-08	27.461	0.074	Biological Process	GO:2001141	regulation of RNA biosynthetic process	1.5701e-08	2.48941e-06	0	0	265	3585
GO:0034654 nucleobase-containing compound biosynthetic process	310	1.62044e-08	32.124	0.072	Biological Process	GO:0034654	nucleobase-containing compound biosynthetic process	1.62044e-08	2.51783e-06	0	0	310	4334
GO:0048856 anatomical structure development	408	1.82461e-08	42.28	0.068	Biological Process	GO:0048856	anatomical structure development	1.82461e-08	2.77949e-06	0	0	408	6022
GO:0060255 regulation of macromolecule metabolic process	428	1.87624e-08	44.352	0.067	Biological Process	GO:0060255	regulation of macromolecule metabolic process	1.87624e-08	2.80318e-06	0	0	428	6375
GO:0034645 cellular macromolecule biosynthetic process	349	2.03449e-08	36.166	0.07	Biological Process	GO:0034645	cellular macromolecule biosynthetic process	2.03449e-08	2.98225e-06	0	0	349	5005
GO:0045595 regulation of cell differentiation	158	2.3088e-08	16.373	0.083	Biological Process	GO:0045595	regulation of cell differentiation	2.3088e-08	3.29201e-06	0	0	158	1900
GO:0045597 positive regulation of cell differentiation	97	2.33055e-08	10.052	0.096	Biological Process	GO:0045597	positive regulation of cell differentiation	2.33055e-08	3.29201e-06	0	0	97	1008
GO:0006351 transcription, DNA-templated	274	2.56601e-08	28.394	0.073	Biological Process	GO:0006351	transcription, DNA-templated	2.56601e-08	3.55988e-06	0	0	274	3752
GO:0097659 nucleic acid-templated transcription	274	2.70193e-08	28.394	0.073	Biological Process	GO:0097659	nucleic acid-templated transcription	2.70193e-08	3.68269e-06	0	0	274	3754
GO:0051094 positive regulation of developmental process	124	3.46825e-08	12.85	0.088	Biological Process	GO:0051094	positive regulation of developmental process	3.46825e-08	4.64566e-06	0	0	124	1403
GO:0019438 aromatic compound biosynthetic process	313	3.5728e-08	32.435	0.071	Biological Process	GO:0019438	aromatic compound biosynthetic process	3.5728e-08	4.70459e-06	0	0	313	4417
GO:0018130 heterocycle biosynthetic process	312	4.21108e-08	32.332	0.071	Biological Process	GO:0018130	heterocycle biosynthetic process	4.21108e-08	5.45265e-06	0	0	312	4407
GO:0032774 RNA biosynthetic process	274	4.61858e-08	28.394	0.073	Biological Process	GO:0032774	RNA biosynthetic process	4.61858e-08	5.88226e-06	0	0	274	3775
GO:0044260 cellular macromolecule metabolic process	544	6.07925e-08	56.373	0.064	Biological Process	GO:0044260	cellular macromolecule metabolic process	6.07925e-08	7.61769e-06	0	0	544	8525
GO:0009812 flavonoid metabolic process	9	6.56781e-08	0.933	0.529	Biological Process	GO:0009812	flavonoid metabolic process	6.56781e-08	8.09925e-06	0	0	9	17
GO:0009790 embryo development	98	7.29351e-08	10.155	0.094	Biological Process	GO:0009790	embryo development	7.29351e-08	8.77221e-06	0	0	98	1046
GO:0009890 negative regulation of biosynthetic process	139	7.33934e-08	14.404	0.084	Biological Process	GO:0009890	negative regulation of biosynthetic process	7.33934e-08	8.77221e-06	0	0	139	1645
GO:0031327 negative regulation of cellular biosynthetic process	137	7.61788e-08	14.197	0.085	Biological Process	GO:0031327	negative regulation of cellular biosynthetic process	7.61788e-08	8.89029e-06	0	0	137	1616
GO:0043412 macromolecule modification	319	7.66701e-08	33.057	0.07	Biological Process	GO:0043412	macromolecule modification	7.66701e-08	8.89029e-06	0	0	319	4551
GO:0010646 regulation of cell communication	260	9.75588e-08	26.943	0.073	Biological Process	GO:0010646	regulation of cell communication	9.75588e-08	1.11461e-05	0	0	260	3573
GO:0048731 system development	342	1.02016e-07	35.44	0.069	Biological Process	GO:0048731	system development	1.02016e-07	1.14864e-05	0	0	342	4956
GO:0009653 anatomical structure morphogenesis	206	1.22133e-07	21.347	0.076	Biological Process	GO:0009653	anatomical structure morphogenesis	1.22133e-07	1.3555e-05	0	0	206	2703
GO:0009892 negative regulation of metabolic process	233	1.324e-07	24.145	0.074	Biological Process	GO:0009892	negative regulation of metabolic process	1.324e-07	1.44875e-05	0	0	233	3142
GO:0048666 neuron development	104	1.72161e-07	10.777	0.09	Biological Process	GO:0048666	neuron development	1.72161e-07	1.85767e-05	0	0	104	1151
GO:0050794 regulation of cellular process	677	1.76523e-07	70.155	0.061	Biological Process	GO:0050794	regulation of cellular process	1.76523e-07	1.87864e-05	0	0	677	11089
GO:0023051 regulation of signaling	261	1.97772e-07	27.047	0.072	Biological Process	GO:0023051	regulation of signaling	1.97772e-07	2.07634e-05	0	0	261	3618
GO:0009966 regulation of signal transduction	235	2.24808e-07	24.352	0.074	Biological Process	GO:0009966	regulation of signal transduction	2.24808e-07	2.32871e-05	0	0	235	3195
GO:0001763 morphogenesis of a branching structure	30	2.40227e-07	3.109	0.154	Biological Process	GO:0001763	morphogenesis of a branching structure	2.40227e-07	2.45569e-05	0	0	30	195
GO:0048519 negative regulation of biological process	381	2.50434e-07	39.482	0.067	Biological Process	GO:0048519	negative regulation of biological process	2.50434e-07	2.52678e-05	0	0	381	5673
GO:0048598 embryonic morphogenesis	63	3.01369e-07	6.528	0.106	Biological Process	GO:0048598	embryonic morphogenesis	3.01369e-07	3.00172e-05	0	0	63	595
GO:1901362 organic cyclic compound biosynthetic process	316	3.30871e-07	32.746	0.069	Biological Process	GO:1901362	organic cyclic compound biosynthetic process	3.30871e-07	3.25384e-05	0	0	316	4565
GO:0052695 cellular glucuronidation	9	3.9114e-07	0.933	0.45	Biological Process	GO:0052695	cellular glucuronidation	3.9114e-07	3.79845e-05	0	0	9	20
GO:0007417 central nervous system development	95	4.11186e-07	9.845	0.091	Biological Process	GO:0007417	central nervous system development	4.11186e-07	3.94383e-05	0	0	95	1042
GO:0045934 negative regulation of nucleobase-containing compound metabolic process	132	4.76791e-07	13.679	0.083	Biological Process	GO:0045934	negative regulation of nucleobase-containing compound metabolic process	4.76791e-07	4.5173e-05	0	0	132	1592
GO:0040007 growth	88	5.28682e-07	9.119	0.093	Biological Process	GO:0040007	growth	5.28682e-07	4.94859e-05	0	0	88	948
GO:0051253 negative regulation of RNA metabolic process	122	5.82671e-07	12.642	0.084	Biological Process	GO:0051253	negative regulation of RNA metabolic process	5.82671e-07	5.38902e-05	0	0	122	1447
GO:0031324 negative regulation of cellular metabolic process	201	6.22522e-07	20.829	0.075	Biological Process	GO:0031324	negative regulation of cellular metabolic process	6.22522e-07	5.68985e-05	0	0	201	2682
GO:0051239 regulation of multicellular organismal process	236	6.37614e-07	24.456	0.073	Biological Process	GO:0051239	regulation of multicellular organismal process	6.37614e-07	5.76003e-05	0	0	236	3253
GO:2000026 regulation of multicellular organismal development	165	7.57118e-07	17.098	0.078	Biological Process	GO:2000026	regulation of multicellular organismal development	7.57118e-07	6.76098e-05	0	0	165	2116
GO:0006915 apoptotic process	153	1.25301e-06	15.855	0.079	Biological Process	GO:0006915	apoptotic process	1.25301e-06	0.000110621	0	0	153	1945
GO:0010558 negative regulation of macromolecule biosynthetic process	127	1.27811e-06	13.161	0.082	Biological Process	GO:0010558	negative regulation of macromolecule biosynthetic process	1.27811e-06	0.000111569	0	0	127	1545
GO:0061138 morphogenesis of a branching epithelium	27	1.7571e-06	2.798	0.149	Biological Process	GO:0061138	morphogenesis of a branching epithelium	1.7571e-06	0.000151677	0	0	27	181
GO:0050789 regulation of biological process	708	1.85091e-06	73.368	0.06	Biological Process	GO:0050789	regulation of biological process	1.85091e-06	0.000156365	0	0	708	11817
GO:0048732 gland development	49	1.85167e-06	5.078	0.111	Biological Process	GO:0048732	gland development	1.85167e-06	0.000156365	0	0	49	443
GO:1903507 negative regulation of nucleic acid-templated transcription	112	2.33989e-06	11.606	0.084	Biological Process	GO:1903507	negative regulation of nucleic acid-templated transcription	2.33989e-06	0.000195469	0	0	112	1336
GO:2000113 negative regulation of cellular macromolecule biosynthetic process	125	2.44342e-06	12.953	0.081	Biological Process	GO:2000113	negative regulation of cellular macromolecule biosynthetic process	2.44342e-06	0.000201946	0	0	125	1534
GO:0007169 transmembrane receptor protein tyrosine kinase signaling pathway	70	2.49962e-06	7.254	0.096	Biological Process	GO:0007169	transmembrane receptor protein tyrosine kinase signaling pathway	2.49962e-06	0.0002032	0	0	70	729
GO:1902679 negative regulation of RNA biosynthetic process	112	2.5109e-06	11.606	0.084	Biological Process	GO:1902679	negative regulation of RNA biosynthetic process	2.5109e-06	0.0002032	0	0	112	1338
GO:0051552 flavone metabolic process	5	2.6999e-06	0.518	0.833	Biological Process	GO:0051552	flavone metabolic process	2.6999e-06	0.000216242	0	0	5	6
GO:0010468 regulation of gene expression	320	2.80448e-06	33.161	0.068	Biological Process	GO:0010468	regulation of gene expression	2.80448e-06	0.000222326	0	0	320	4736
GO:0045892 negative regulation of transcription, DNA-templated	111	3.69115e-06	11.503	0.083	Biological Process	GO:0045892	negative regulation of transcription, DNA-templated	3.69115e-06	0.000281154	0	0	111	1334
GO:0006063 uronic acid metabolic process	9	3.71619e-06	0.933	0.36	Biological Process	GO:0006063	uronic acid metabolic process	3.71619e-06	0.000281154	0	0	9	25
GO:0019585 glucuronate metabolic process	9	3.71619e-06	0.933	0.36	Biological Process	GO:0019585	glucuronate metabolic process	3.71619e-06	0.000281154	0	0	9	25
GO:0043009 chordate embryonic development	62	3.71778e-06	6.425	0.099	Biological Process	GO:0043009	chordate embryonic development	3.71778e-06	0.000281154	0	0	62	627
GO:0021954 central nervous system neuron development	17	3.72748e-06	1.762	0.195	Biological Process	GO:0021954	central nervous system neuron development	3.72748e-06	0.000281154	0	0	17	87
GO:0009058 biosynthetic process	410	3.9065e-06	42.487	0.065	Biological Process	GO:0009058	biosynthetic process	3.9065e-06	0.000291823	0	0	410	6327
GO:1901576 organic substance biosynthetic process	405	4.09683e-06	41.969	0.065	Biological Process	GO:1901576	organic substance biosynthetic process	4.09683e-06	0.000301972	0	0	405	6241
GO:0048589 developmental growth	62	4.1201e-06	6.425	0.099	Biological Process	GO:0048589	developmental growth	4.1201e-06	0.000301972	0	0	62	629
GO:1990830 cellular response to leukemia inhibitory factor	17	4.38902e-06	1.762	0.193	Biological Process	GO:1990830	cellular response to leukemia inhibitory factor	4.38902e-06	0.000318676	0	0	17	88
GO:0065007 biological regulation	742	4.60684e-06	76.891	0.059	Biological Process	GO:0065007	biological regulation	4.60684e-06	0.000331394	0	0	742	12535
GO:0009792 embryo development ending in birth or egg hatching	63	5.12218e-06	6.528	0.097	Biological Process	GO:0009792	embryo development ending in birth or egg hatching	5.12218e-06	0.000363263	0	0	63	647
GO:1990823 response to leukemia inhibitory factor	17	5.15415e-06	1.762	0.191	Biological Process	GO:1990823	response to leukemia inhibitory factor	5.15415e-06	0.000363263	0	0	17	89
GO:0051960 regulation of nervous system development	84	5.19013e-06	8.705	0.089	Biological Process	GO:0051960	regulation of nervous system development	5.19013e-06	0.000363263	0	0	84	944
GO:0044271 cellular nitrogen compound biosynthetic process	337	5.33698e-06	34.922	0.067	Biological Process	GO:0044271	cellular nitrogen compound biosynthetic process	5.33698e-06	0.000367115	0	0	337	5063
GO:0012501 programmed cell death	159	5.33969e-06	16.477	0.076	Biological Process	GO:0012501	programmed cell death	5.33969e-06	0.000367115	0	0	159	2090
GO:0048663 neuron fate commitment	14	5.53834e-06	1.451	0.222	Biological Process	GO:0048663	neuron fate commitment	5.53834e-06	0.000377433	0	0	14	63
GO:0035265 organ growth	24	6.58728e-06	2.487	0.149	Biological Process	GO:0035265	organ growth	6.58728e-06	0.000444626	0	0	24	161
GO:0044249 cellular biosynthetic process	399	6.63876e-06	41.347	0.065	Biological Process	GO:0044249	cellular biosynthetic process	6.63876e-06	0.000444626	0	0	399	6162
GO:0043067 regulation of programmed cell death	125	7.22638e-06	12.953	0.08	Biological Process	GO:0043067	regulation of programmed cell death	7.22638e-06	0.000479844	0	0	125	1568
GO:0009887 animal organ morphogenesis	92	7.67818e-06	9.534	0.086	Biological Process	GO:0009887	animal organ morphogenesis	7.67818e-06	0.000505523	0	0	92	1071
GO:0042981 regulation of apoptotic process	123	8.13663e-06	12.746	0.08	Biological Process	GO:0042981	regulation of apoptotic process	8.13663e-06	0.000531206	0	0	123	1541
GO:0010941 regulation of cell death	133	9.17597e-06	13.782	0.078	Biological Process	GO:0010941	regulation of cell death	9.17597e-06	0.000594067	0	0	133	1700
GO:0048513 animal organ development	253	9.49656e-06	26.218	0.069	Biological Process	GO:0048513	animal organ development	9.49656e-06	0.000609742	0	0	253	3656
GO:0090304 nucleic acid metabolic process	349	9.82748e-06	36.166	0.066	Biological Process	GO:0090304	nucleic acid metabolic process	9.82748e-06	0.000625817	0	0	349	5305
GO:0061061 muscle structure development	61	9.99231e-06	6.321	0.096	Biological Process	GO:0061061	muscle structure development	9.99231e-06	0.000630241	0	0	61	633
GO:0010629 negative regulation of gene expression	154	1.00592e-05	15.959	0.076	Biological Process	GO:0010629	negative regulation of gene expression	1.00592e-05	0.000630241	0	0	154	2034
GO:0051172 negative regulation of nitrogen compound metabolic process	184	1.02385e-05	19.067	0.073	Biological Process	GO:0051172	negative regulation of nitrogen compound metabolic process	1.02385e-05	0.000636344	0	0	184	2517
GO:0016070 RNA metabolic process	317	1.06971e-05	32.85	0.067	Biological Process	GO:0016070	RNA metabolic process	1.06971e-05	0.000659569	0	0	317	4754
GO:0048729 tissue morphogenesis	63	1.11409e-05	6.528	0.095	Biological Process	GO:0048729	tissue morphogenesis	1.11409e-05	0.000677655	0	0	63	663
GO:0000122 negative regulation of transcription by RNA polymerase II	80	1.11649e-05	8.29	0.088	Biological Process	GO:0000122	negative regulation of transcription by RNA polymerase II	1.11649e-05	0.000677655	0	0	80	905
GO:0021884 forebrain neuron development	10	1.14103e-05	1.036	0.286	Biological Process	GO:0021884	forebrain neuron development	1.14103e-05	0.000687185	0	0	10	35
GO:0008219 cell death	166	1.21314e-05	17.202	0.074	Biological Process	GO:0008219	cell death	1.21314e-05	0.000724991	0	0	166	2233
GO:0065009 regulation of molecular function	220	1.24586e-05	22.798	0.071	Biological Process	GO:0065009	regulation of molecular function	1.24586e-05	0.00073886	0	0	220	3117
GO:0019216 regulation of lipid metabolic process	43	1.32426e-05	4.456	0.108	Biological Process	GO:0019216	regulation of lipid metabolic process	1.32426e-05	0.000779408	0	0	43	397
GO:0044237 cellular metabolic process	660	1.34924e-05	68.394	0.06	Biological Process	GO:0044237	cellular metabolic process	1.34924e-05	0.000788139	0	0	660	11007
GO:0043170 macromolecule metabolic process	589	1.50662e-05	61.036	0.061	Biological Process	GO:0043170	macromolecule metabolic process	1.50662e-05	0.000873504	0	0	589	9672
GO:0010942 positive regulation of cell death	66	1.53286e-05	6.839	0.093	Biological Process	GO:0010942	positive regulation of cell death	1.53286e-05	0.000882132	0	0	66	712
GO:0071310 cellular response to organic substance	194	1.59433e-05	20.104	0.072	Biological Process	GO:0071310	cellular response to organic substance	1.59433e-05	0.000905698	0	0	194	2699
GO:0007409 axonogenesis	49	1.59712e-05	5.078	0.102	Biological Process	GO:0007409	axonogenesis	1.59712e-05	0.000905698	0	0	49	479
GO:0035295 tube development	89	1.62902e-05	9.223	0.085	Biological Process	GO:0035295	tube development	1.62902e-05	0.000917093	0	0	89	1047
GO:0010605 negative regulation of macromolecule metabolic process	205	1.78455e-05	21.244	0.071	Biological Process	GO:0010605	negative regulation of macromolecule metabolic process	1.78455e-05	0.00099742	0	0	205	2885
GO:0035239 tube morphogenesis	75	1.84215e-05	7.772	0.089	Biological Process	GO:0035239	tube morphogenesis	1.84215e-05	0.00102226	0	0	75	845
GO:0110110 positive regulation of animal organ morphogenesis	16	1.86234e-05	1.658	0.182	Biological Process	GO:0110110	positive regulation of animal organ morphogenesis	1.86234e-05	0.00102613	0	0	16	88
GO:0045912 negative regulation of carbohydrate metabolic process	12	2.10483e-05	1.244	0.226	Biological Process	GO:0045912	negative regulation of carbohydrate metabolic process	2.10483e-05	0.00115158	0	0	12	53
GO:0043065 positive regulation of apoptotic process	61	2.23498e-05	6.321	0.094	Biological Process	GO:0043065	positive regulation of apoptotic process	2.23498e-05	0.00121423	0	0	61	650
GO:0048664 neuron fate determination	5	2.29816e-05	0.518	0.625	Biological Process	GO:0048664	neuron fate determination	2.29816e-05	0.00123391	0	0	5	8
GO:0008283 cell proliferation	146	2.30296e-05	15.13	0.075	Biological Process	GO:0008283	cell proliferation	2.30296e-05	0.00123391	0	0	146	1938
GO:0043068 positive regulation of programmed cell death	61	2.93655e-05	6.321	0.093	Biological Process	GO:0043068	positive regulation of programmed cell death	2.93655e-05	0.00156261	0	0	61	656
GO:0065008 regulation of biological quality	279	3.21573e-05	28.912	0.067	Biological Process	GO:0065008	regulation of biological quality	3.21573e-05	0.00169952	0	0	279	4160
GO:0046903 secretion	116	3.48451e-05	12.021	0.078	Biological Process	GO:0046903	secretion	3.48451e-05	0.0018232	0	0	116	1481
GO:0007219 Notch signaling pathway	25	3.49667e-05	2.591	0.132	Biological Process	GO:0007219	Notch signaling pathway	3.49667e-05	0.0018232	0	0	25	189
GO:0051240 positive regulation of multicellular organismal process	137	3.60256e-05	14.197	0.076	Biological Process	GO:0051240	positive regulation of multicellular organismal process	3.60256e-05	0.00186589	0	0	137	1812
GO:0060284 regulation of cell development	82	3.86432e-05	8.497	0.085	Biological Process	GO:0060284	regulation of cell development	3.86432e-05	0.00198821	0	0	82	967
GO:0010677 negative regulation of cellular carbohydrate metabolic process	11	4.10654e-05	1.14	0.229	Biological Process	GO:0010677	negative regulation of cellular carbohydrate metabolic process	4.10654e-05	0.00209893	0	0	11	48
GO:0009791 post-embryonic development	15	4.20265e-05	1.554	0.179	Biological Process	GO:0009791	post-embryonic development	4.20265e-05	0.00213401	0	0	15	84
GO:0051093 negative regulation of developmental process	83	4.32385e-05	8.601	0.084	Biological Process	GO:0051093	negative regulation of developmental process	4.32385e-05	0.00217893	0	0	83	985
GO:0045833 negative regulation of lipid metabolic process	16	4.34721e-05	1.658	0.17	Biological Process	GO:0045833	negative regulation of lipid metabolic process	4.34721e-05	0.00217893	0	0	16	94
GO:0048738 cardiac muscle tissue development	27	4.38525e-05	2.798	0.126	Biological Process	GO:0048738	cardiac muscle tissue development	4.38525e-05	0.00218391	0	0	27	215
GO:0003002 regionalization	37	4.42806e-05	3.834	0.109	Biological Process	GO:0003002	regionalization	4.42806e-05	0.00219118	0	0	37	339
GO:0006807 nitrogen compound metabolic process	626	4.88689e-05	64.87	0.06	Biological Process	GO:0006807	nitrogen compound metabolic process	4.88689e-05	0.00240293	0	0	626	10444
GO:0090184 positive regulation of kidney development	10	5.17457e-05	1.036	0.244	Biological Process	GO:0090184	positive regulation of kidney development	5.17457e-05	0.00251007	0	0	10	41
GO:0044238 primary metabolic process	650	5.20784e-05	67.358	0.06	Biological Process	GO:0044238	primary metabolic process	5.20784e-05	0.00251007	0	0	650	10903
GO:0044267 cellular protein metabolic process	347	5.21198e-05	35.959	0.065	Biological Process	GO:0044267	cellular protein metabolic process	5.21198e-05	0.00251007	0	0	347	5367
GO:0015780 nucleotide-sugar transmembrane transport	6	5.24657e-05	0.622	0.429	Biological Process	GO:0015780	nucleotide-sugar transmembrane transport	5.24657e-05	0.00251007	0	0	6	14
GO:0000380 alternative mRNA splicing, via spliceosome	14	5.26634e-05	1.451	0.184	Biological Process	GO:0000380	alternative mRNA splicing, via spliceosome	5.26634e-05	0.00251007	0	0	14	76
GO:0048812 neuron projection morphogenesis	61	5.43349e-05	6.321	0.091	Biological Process	GO:0048812	neuron projection morphogenesis	5.43349e-05	0.00257395	0	0	61	670
GO:0042127 regulation of cell proliferation	126	5.67357e-05	13.057	0.076	Biological Process	GO:0042127	regulation of cell proliferation	5.67357e-05	0.00265791	0	0	126	1655
GO:0021516 dorsal spinal cord development	7	5.71336e-05	0.725	0.35	Biological Process	GO:0021516	dorsal spinal cord development	5.71336e-05	0.00265791	0	0	7	20
GO:0060065 uterus development	7	5.71336e-05	0.725	0.35	Biological Process	GO:0060065	uterus development	5.71336e-05	0.00265791	0	0	7	20
GO:0042325 regulation of phosphorylation	124	5.75589e-05	12.85	0.076	Biological Process	GO:0042325	regulation of phosphorylation	5.75589e-05	0.00266176	0	0	124	1624
GO:0014066 regulation of phosphatidylinositol 3-kinase signaling	19	6.22668e-05	1.969	0.148	Biological Process	GO:0014066	regulation of phosphatidylinositol 3-kinase signaling	6.22668e-05	0.00286243	0	0	19	128
GO:0002009 morphogenesis of an epithelium	53	6.43061e-05	5.492	0.094	Biological Process	GO:0002009	morphogenesis of an epithelium	6.43061e-05	0.00293879	0	0	53	561
GO:0050767 regulation of neurogenesis	72	6.61117e-05	7.461	0.086	Biological Process	GO:0050767	regulation of neurogenesis	6.61117e-05	0.00300364	0	0	72	834
GO:0000902 cell morphogenesis	86	7.01996e-05	8.912	0.082	Biological Process	GO:0000902	cell morphogenesis	7.01996e-05	0.00317082	0	0	86	1044
GO:0060688 regulation of morphogenesis of a branching structure	11	7.45319e-05	1.14	0.216	Biological Process	GO:0060688	regulation of morphogenesis of a branching structure	7.45319e-05	0.00332595	0	0	11	51
GO:0001704 formation of primary germ layer	18	7.50208e-05	1.865	0.151	Biological Process	GO:0001704	formation of primary germ layer	7.50208e-05	0.00332595	0	0	18	119
GO:0060537 muscle tissue development	40	7.51252e-05	4.145	0.103	Biological Process	GO:0060537	muscle tissue development	7.51252e-05	0.00332595	0	0	40	387
GO:0051338 regulation of transferase activity	84	7.53465e-05	8.705	0.083	Biological Process	GO:0051338	regulation of transferase activity	7.53465e-05	0.00332595	0	0	84	1016
GO:0048667 cell morphogenesis involved in neuron differentiation	56	7.67377e-05	5.803	0.092	Biological Process	GO:0048667	cell morphogenesis involved in neuron differentiation	7.67377e-05	0.00336822	0	0	56	607
GO:0000381 regulation of alternative mRNA splicing, via spliceosome	12	7.7704e-05	1.244	0.2	Biological Process	GO:0000381	regulation of alternative mRNA splicing, via spliceosome	7.7704e-05	0.00337253	0	0	12	60
GO:0021879 forebrain neuron differentiation	12	7.7704e-05	1.244	0.2	Biological Process	GO:0021879	forebrain neuron differentiation	7.7704e-05	0.00337253	0	0	12	60
GO:0001701 in utero embryonic development	39	8.05634e-05	4.041	0.104	Biological Process	GO:0001701	in utero embryonic development	8.05634e-05	0.00347721	0	0	39	375
GO:0007167 enzyme linked receptor protein signaling pathway	87	8.25672e-05	9.016	0.082	Biological Process	GO:0007167	enzyme linked receptor protein signaling pathway	8.25672e-05	0.003544	0	0	87	1064
GO:0045165 cell fate commitment	30	8.37603e-05	3.109	0.115	Biological Process	GO:0045165	cell fate commitment	8.37603e-05	0.00356572	0	0	30	260
GO:0045664 regulation of neuron differentiation	60	8.3991e-05	6.218	0.09	Biological Process	GO:0045664	regulation of neuron differentiation	8.3991e-05	0.00356572	0	0	60	666
GO:0043549 regulation of kinase activity	76	8.52858e-05	7.876	0.084	Biological Process	GO:0043549	regulation of kinase activity	8.52858e-05	0.00360101	0	0	76	900
GO:0051247 positive regulation of protein metabolic process	128	9.4266e-05	13.264	0.075	Biological Process	GO:0051247	positive regulation of protein metabolic process	9.4266e-05	0.00395866	0	0	128	1706
GO:0120039 plasma membrane bounded cell projection morphogenesis	61	9.76389e-05	6.321	0.089	Biological Process	GO:0120039	plasma membrane bounded cell projection morphogenesis	9.76389e-05	0.00407826	0	0	61	684
GO:0030900 forebrain development	40	9.93643e-05	4.145	0.102	Biological Process	GO:0030900	forebrain development	9.93643e-05	0.00412813	0	0	40	392
GO:0051241 negative regulation of multicellular organismal process	98	0.000102681	10.155	0.079	Biological Process	GO:0051241	negative regulation of multicellular organismal process	0.000102681	0.00424325	0	0	98	1239
GO:0071495 cellular response to endogenous stimulus	109	0.000103544	11.295	0.077	Biological Process	GO:0071495	cellular response to endogenous stimulus	0.000103544	0.00425625	0	0	109	1410
GO:0072359 circulatory system development	88	0.000106361	9.119	0.081	Biological Process	GO:0072359	circulatory system development	0.000106361	0.00434903	0	0	88	1087
GO:0014068 positive regulation of phosphatidylinositol 3-kinase signaling	15	0.000109063	1.554	0.165	Biological Process	GO:0014068	positive regulation of phosphatidylinositol 3-kinase signaling	0.000109063	0.00441061	0	0	15	91
GO:0032940 secretion by cell	104	0.000109288	10.777	0.078	Biological Process	GO:0032940	secretion by cell	0.000109288	0.00441061	0	0	104	1334
GO:0070887 cellular response to chemical stimulus	224	0.00010957	23.212	0.068	Biological Process	GO:0070887	cellular response to chemical stimulus	0.00010957	0.00441061	0	0	224	3291
GO:0032879 regulation of localization	193	0.000110269	20	0.07	Biological Process	GO:0032879	regulation of localization	0.000110269	0.00441587	0	0	193	2772
GO:0014065 phosphatidylinositol 3-kinase signaling	21	0.000111926	2.176	0.135	Biological Process	GO:0014065	phosphatidylinositol 3-kinase signaling	0.000111926	0.00445923	0	0	21	156
GO:0031175 neuron projection development	83	0.000112695	8.601	0.082	Biological Process	GO:0031175	neuron projection development	0.000112695	0.00446699	0	0	83	1013
GO:0048858 cell projection morphogenesis	61	0.000114841	6.321	0.089	Biological Process	GO:0048858	cell projection morphogenesis	0.000114841	0.00449054	0	0	61	688
GO:0001944 vasculature development	63	0.000115023	6.528	0.088	Biological Process	GO:0001944	vasculature development	0.000115023	0.00449054	0	0	63	717
GO:0072358 cardiovascular system development	63	0.000115023	6.528	0.088	Biological Process	GO:0072358	cardiovascular system development	0.000115023	0.00449054	0	0	63	717
GO:0022603 regulation of anatomical structure morphogenesis	88	0.000120756	9.119	0.081	Biological Process	GO:0022603	regulation of anatomical structure morphogenesis	0.000120756	0.00469077	0	0	88	1091
GO:0060562 epithelial tube morphogenesis	35	0.000125113	3.627	0.106	Biological Process	GO:0060562	epithelial tube morphogenesis	0.000125113	0.00483585	0	0	35	330
GO:0014706 striated muscle tissue development	38	0.000128582	3.938	0.103	Biological Process	GO:0014706	striated muscle tissue development	0.000128582	0.00494533	0	0	38	370
GO:0061564 axon development	49	0.000134164	5.078	0.094	Biological Process	GO:0061564	axon development	0.000134164	0.0051346	0	0	49	521
GO:0032989 cellular component morphogenesis	91	0.000145995	9.43	0.08	Biological Process	GO:0032989	cellular component morphogenesis	0.000145995	0.00555996	0	0	91	1143
GO:0008152 metabolic process	692	0.000155543	71.71	0.059	Biological Process	GO:0008152	metabolic process	0.000155543	0.00585289	0	0	692	11780
GO:0044344 cellular response to fibroblast growth factor stimulus	19	0.000157275	1.969	0.139	Biological Process	GO:0044344	cellular response to fibroblast growth factor stimulus	0.000157275	0.00585289	0	0	19	137
GO:0051179 localization	422	0.000157328	43.731	0.062	Biological Process	GO:0051179	localization	0.000157328	0.00585289	0	0	422	6771
GO:0003006 developmental process involved in reproduction	61	0.000157804	6.321	0.088	Biological Process	GO:0003006	developmental process involved in reproduction	0.000157804	0.00585289	0	0	61	696
GO:0048562 embryonic organ morphogenesis	32	0.000158962	3.316	0.108	Biological Process	GO:0048562	embryonic organ morphogenesis	0.000158962	0.00585289	0	0	32	295
GO:1904223 regulation of glucuronosyltransferase activity	3	0.000160407	0.311	1	Biological Process	GO:1904223	regulation of glucuronosyltransferase activity	0.000160407	0.00585289	0	0	3	3
GO:1904224 negative regulation of glucuronosyltransferase activity	3	0.000160407	0.311	1	Biological Process	GO:1904224	negative regulation of glucuronosyltransferase activity	0.000160407	0.00585289	0	0	3	3
GO:2001030 negative regulation of cellular glucuronidation	3	0.000160407	0.311	1	Biological Process	GO:2001030	negative regulation of cellular glucuronidation	0.000160407	0.00585289	0	0	3	3
GO:0045666 positive regulation of neuron differentiation	38	0.000160467	3.938	0.102	Biological Process	GO:0045666	positive regulation of neuron differentiation	0.000160467	0.00585289	0	0	38	374
GO:0031399 regulation of protein modification process	137	0.000165809	14.197	0.073	Biological Process	GO:0031399	regulation of protein modification process	0.000165809	0.00601949	0	0	137	1873
GO:0035051 cardiocyte differentiation	19	0.00017328	1.969	0.138	Biological Process	GO:0035051	cardiocyte differentiation	0.00017328	0.0062401	0	0	19	138
GO:0060322 head development	69	0.000173492	7.15	0.085	Biological Process	GO:0060322	head development	0.000173492	0.0062401	0	0	69	816
GO:0016477 cell migration	116	0.000176898	12.021	0.075	Biological Process	GO:0016477	cell migration	0.000176898	0.00633328	0	0	116	1540
GO:0048608 reproductive structure development	42	0.000186397	4.352	0.097	Biological Process	GO:0048608	reproductive structure development	0.000186397	0.00664275	0	0	42	431
GO:0008593 regulation of Notch signaling pathway	16	0.000189663	1.658	0.151	Biological Process	GO:0008593	regulation of Notch signaling pathway	0.000189663	0.00672829	0	0	16	106
GO:1902531 regulation of intracellular signal transduction	140	0.000197773	14.508	0.073	Biological Process	GO:1902531	regulation of intracellular signal transduction	0.000197773	0.00697785	0	0	140	1929
GO:0007389 pattern specification process	43	0.000198495	4.456	0.096	Biological Process	GO:0007389	pattern specification process	0.000198495	0.00697785	0	0	43	446
GO:0048754 branching morphogenesis of an epithelial tube	20	0.000201721	2.073	0.132	Biological Process	GO:0048754	branching morphogenesis of an epithelial tube	0.000201721	0.00705933	0	0	20	151
GO:0035556 intracellular signal transduction	200	0.000203308	20.725	0.068	Biological Process	GO:0035556	intracellular signal transduction	0.000203308	0.00708295	0	0	200	2920
GO:0031648 protein destabilization	10	0.000213583	1.036	0.208	Biological Process	GO:0031648	protein destabilization	0.000213583	0.00740607	0	0	10	48
GO:0072089 stem cell proliferation	17	0.000215818	1.762	0.144	Biological Process	GO:0072089	stem cell proliferation	0.000215818	0.00740607	0	0	17	118
GO:0016567 protein ubiquitination	74	0.000216183	7.668	0.082	Biological Process	GO:0016567	protein ubiquitination	0.000216183	0.00740607	0	0	74	897
GO:0061458 reproductive system development	42	0.000216396	4.352	0.097	Biological Process	GO:0061458	reproductive system development	0.000216396	0.00740607	0	0	42	434
GO:0032990 cell part morphogenesis	61	0.00022327	6.321	0.087	Biological Process	GO:0032990	cell part morphogenesis	0.00022327	0.00760782	0	0	61	705
GO:1903725 regulation of phospholipid metabolic process	15	0.000227095	1.554	0.155	Biological Process	GO:1903725	regulation of phospholipid metabolic process	0.000227095	0.00770438	0	0	15	97
GO:0040008 regulation of growth	58	0.000229732	6.01	0.088	Biological Process	GO:0040008	regulation of growth	0.000229732	0.00775995	0	0	58	662
GO:0050878 regulation of body fluid levels	48	0.00023172	4.974	0.092	Biological Process	GO:0050878	regulation of body fluid levels	0.00023172	0.00779322	0	0	48	519
GO:0070647 protein modification by small protein conjugation or removal	93	0.000235649	9.637	0.078	Biological Process	GO:0070647	protein modification by small protein conjugation or removal	0.000235649	0.00789119	0	0	93	1190
GO:0009968 negative regulation of signal transduction	100	0.000242589	10.363	0.077	Biological Process	GO:0009968	negative regulation of signal transduction	0.000242589	0.00808873	0	0	100	1300
GO:0016043 cellular component organization	419	0.000243918	43.42	0.062	Biological Process	GO:0016043	cellular component organization	0.000243918	0.0080983	0	0	419	6748
GO:0021515 cell differentiation in spinal cord	10	0.00025543	1.036	0.204	Biological Process	GO:0021515	cell differentiation in spinal cord	0.00025543	0.00844442	0	0	10	49
GO:0032501 multicellular organismal process	475	0.00026615	49.223	0.061	Biological Process	GO:0032501	multicellular organismal process	0.00026615	0.00873558	0	0	475	7767
GO:1902866 regulation of retina development in camera-type eye	4	0.000266621	0.415	0.571	Biological Process	GO:1902866	regulation of retina development in camera-type eye	0.000266621	0.00873558	0	0	4	7
GO:2000027 regulation of animal organ morphogenesis	28	0.000269002	2.902	0.111	Biological Process	GO:2000027	regulation of animal organ morphogenesis	0.000269002	0.00873558	0	0	28	252
GO:0048646 anatomical structure formation involved in morphogenesis	87	0.00027038	9.016	0.079	Biological Process	GO:0048646	anatomical structure formation involved in morphogenesis	0.00027038	0.00873558	0	0	87	1102
GO:0043550 regulation of lipid kinase activity	12	0.000270984	1.244	0.176	Biological Process	GO:0043550	regulation of lipid kinase activity	0.000270984	0.00873558	0	0	12	68
GO:0072091 regulation of stem cell proliferation	12	0.000270984	1.244	0.176	Biological Process	GO:0072091	regulation of stem cell proliferation	0.000270984	0.00873558	0	0	12	68
GO:1904029 regulation of cyclin-dependent protein kinase activity	15	0.000285597	1.554	0.152	Biological Process	GO:1904029	regulation of cyclin-dependent protein kinase activity	0.000285597	0.0091686	0	0	15	99
GO:0050790 regulation of catalytic activity	171	0.000291326	17.72	0.07	Biological Process	GO:0050790	regulation of catalytic activity	0.000291326	0.00931404	0	0	171	2455
GO:0010647 positive regulation of cell communication	134	0.000292793	13.886	0.072	Biological Process	GO:0010647	positive regulation of cell communication	0.000292793	0.00932257	0	0	134	1849
GO:0007420 brain development	65	0.000299653	6.736	0.084	Biological Process	GO:0007420	brain development	0.000299653	0.00950206	0	0	65	772
GO:0071774 response to fibroblast growth factor	19	0.000302813	1.969	0.132	Biological Process	GO:0071774	response to fibroblast growth factor	0.000302813	0.00956324	0	0	19	144
GO:0009611 response to wounding	61	0.000312494	6.321	0.085	Biological Process	GO:0009611	response to wounding	0.000312494	0.00982901	0	0	61	714
GO:0018193 peptidyl-amino acid modification	99	0.000315768	10.259	0.077	Biological Process	GO:0018193	peptidyl-amino acid modification	0.000315768	0.0098474	0	0	99	1294
GO:0048015 phosphatidylinositol-mediated signaling	23	0.000316197	2.383	0.12	Biological Process	GO:0048015	phosphatidylinositol-mediated signaling	0.000316197	0.0098474	0	0	23	192
GO:0032270 positive regulation of cellular protein metabolic process	120	0.000316881	12.435	0.074	Biological Process	GO:0032270	positive regulation of cellular protein metabolic process	0.000316881	0.0098474	0	0	120	1627
GO:0001568 blood vessel development	59	0.000329178	6.114	0.086	Biological Process	GO:0001568	blood vessel development	0.000329178	0.0101888	0	0	59	686
GO:0010648 negative regulation of cell communication	106	0.000331183	10.984	0.075	Biological Process	GO:0010648	negative regulation of cell communication	0.000331183	0.0102102	0	0	106	1406
GO:0001932 regulation of protein phosphorylation	109	0.000335467	11.295	0.075	Biological Process	GO:0001932	regulation of protein phosphorylation	0.000335467	0.0102243	0	0	109	1454
GO:0023056 positive regulation of signaling	134	0.000335591	13.886	0.072	Biological Process	GO:0023056	positive regulation of signaling	0.000335591	0.0102243	0	0	134	1855
GO:0048585 negative regulation of response to stimulus	134	0.000335591	13.886	0.072	Biological Process	GO:0048585	negative regulation of response to stimulus	0.000335591	0.0102243	0	0	134	1855
GO:0040011 locomotion	140	0.000347287	14.508	0.072	Biological Process	GO:0040011	locomotion	0.000347287	0.0105393	0	0	140	1954
GO:0006139 nucleobase-containing compound metabolic process	375	0.000349693	38.86	0.063	Biological Process	GO:0006139	nucleobase-containing compound metabolic process	0.000349693	0.0105711	0	0	375	5987
GO:0023057 negative regulation of signaling	106	0.000357832	10.984	0.075	Biological Process	GO:0023057	negative regulation of signaling	0.000357832	0.0107752	0	0	106	1409
GO:0010720 positive regulation of cell development	50	0.000364798	5.181	0.09	Biological Process	GO:0010720	positive regulation of cell development	0.000364798	0.0109425	0	0	50	558
GO:0043085 positive regulation of catalytic activity	106	0.00038642	10.984	0.075	Biological Process	GO:0043085	positive regulation of catalytic activity	0.00038642	0.0115001	0	0	106	1412
GO:0019220 regulation of phosphate metabolic process	132	0.000387828	13.679	0.072	Biological Process	GO:0019220	regulation of phosphate metabolic process	0.000387828	0.0115001	0	0	132	1829
GO:0051174 regulation of phosphorus metabolic process	132	0.000387828	13.679	0.072	Biological Process	GO:0051174	regulation of phosphorus metabolic process	0.000387828	0.0115001	0	0	132	1829
GO:0051145 smooth muscle cell differentiation	11	0.000397988	1.14	0.18	Biological Process	GO:0051145	smooth muscle cell differentiation	0.000397988	0.0117565	0	0	11	61
GO:0045596 negative regulation of cell differentiation	62	0.000405492	6.425	0.084	Biological Process	GO:0045596	negative regulation of cell differentiation	0.000405492	0.0119328	0	0	62	736
GO:0060707 trophoblast giant cell differentiation	5	0.00041999	0.518	0.385	Biological Process	GO:0060707	trophoblast giant cell differentiation	0.00041999	0.0122666	0	0	5	13
GO:0090481 pyrimidine nucleotide-sugar transmembrane transport	5	0.00041999	0.518	0.385	Biological Process	GO:0090481	pyrimidine nucleotide-sugar transmembrane transport	0.00041999	0.0122666	0	0	5	13
GO:0048017 inositol lipid-mediated signaling	23	0.000425731	2.383	0.117	Biological Process	GO:0048017	inositol lipid-mediated signaling	0.000425731	0.0123876	0	0	23	196
GO:0009967 positive regulation of signal transduction	122	0.000440491	12.642	0.073	Biological Process	GO:0009967	positive regulation of signal transduction	0.000440491	0.0127341	0	0	122	1673
GO:0071902 positive regulation of protein serine/threonine kinase activity	34	0.000440917	3.523	0.1	Biological Process	GO:0071902	positive regulation of protein serine/threonine kinase activity	0.000440917	0.0127341	0	0	34	339
GO:1902533 positive regulation of intracellular signal transduction	87	0.0004429	9.016	0.078	Biological Process	GO:1902533	positive regulation of intracellular signal transduction	0.0004429	0.012744	0	0	87	1119
GO:0071704 organic substance metabolic process	663	0.000446299	68.705	0.059	Biological Process	GO:0071704	organic substance metabolic process	0.000446299	0.0127944	0	0	663	11302
GO:0007166 cell surface receptor signaling pathway	208	0.00044806	21.554	0.067	Biological Process	GO:0007166	cell surface receptor signaling pathway	0.00044806	0.0127977	0	0	208	3098
GO:0000904 cell morphogenesis involved in differentiation	63	0.000452501	6.528	0.084	Biological Process	GO:0000904	cell morphogenesis involved in differentiation	0.000452501	0.012854	0	0	63	754
GO:0051128 regulation of cellular component organization	182	0.00045334	18.86	0.068	Biological Process	GO:0051128	regulation of cellular component organization	0.00045334	0.012854	0	0	182	2661
GO:0009896 positive regulation of catabolic process	44	0.000459641	4.56	0.092	Biological Process	GO:0009896	positive regulation of catabolic process	0.000459641	0.0129853	0	0	44	478
GO:0021872 forebrain generation of neurons	12	0.000468252	1.244	0.167	Biological Process	GO:0021872	forebrain generation of neurons	0.000468252	0.0131098	0	0	12	72
GO:0010675 regulation of cellular carbohydrate metabolic process	19	0.000468534	1.969	0.128	Biological Process	GO:0010675	regulation of cellular carbohydrate metabolic process	0.000468534	0.0131098	0	0	19	149
GO:0042327 positive regulation of phosphorylation	85	0.000469111	8.808	0.078	Biological Process	GO:0042327	positive regulation of phosphorylation	0.000469111	0.0131098	0	0	85	1090
GO:0002064 epithelial cell development	25	0.000490195	2.591	0.112	Biological Process	GO:0002064	epithelial cell development	0.000490195	0.0136353	0	0	25	223
GO:0048024 regulation of mRNA splicing, via spliceosome	15	0.000491426	1.554	0.144	Biological Process	GO:0048024	regulation of mRNA splicing, via spliceosome	0.000491426	0.0136353	0	0	15	104
GO:1901699 cellular response to nitrogen compound	57	0.00050221	5.907	0.085	Biological Process	GO:1901699	cellular response to nitrogen compound	0.00050221	0.013885	0	0	57	668
GO:0001709 cell fate determination	9	0.000507588	0.933	0.205	Biological Process	GO:0001709	cell fate determination	0.000507588	0.0139388	0	0	9	44
GO:1901701 cellular response to oxygen-containing compound	89	0.000507748	9.223	0.077	Biological Process	GO:1901701	cellular response to oxygen-containing compound	0.000507748	0.0139388	0	0	89	1155
GO:1905278 positive regulation of epithelial tube formation	4	0.000510261	0.415	0.5	Biological Process	GO:1905278	positive regulation of epithelial tube formation	0.000510261	0.0139585	0	0	4	8
GO:0044093 positive regulation of molecular function	127	0.000531385	13.161	0.072	Biological Process	GO:0044093	positive regulation of molecular function	0.000531385	0.0144854	0	0	127	1762
GO:0071900 regulation of protein serine/threonine kinase activity	46	0.000536681	4.767	0.09	Biological Process	GO:0071900	regulation of protein serine/threonine kinase activity	0.000536681	0.0145786	0	0	46	510
GO:0006725 cellular aromatic compound metabolic process	386	0.00054238	40	0.062	Biological Process	GO:0006725	cellular aromatic compound metabolic process	0.00054238	0.0146821	0	0	386	6215
GO:0045055 regulated exocytosis	65	0.0005561	6.736	0.082	Biological Process	GO:0045055	regulated exocytosis	0.0005561	0.0150012	0	0	65	790
GO:0042060 wound healing	52	0.000567875	5.389	0.087	Biological Process	GO:0042060	wound healing	0.000567875	0.0152658	0	0	52	598
GO:0007049 cell cycle	136	0.000574727	14.093	0.071	Biological Process	GO:0007049	cell cycle	0.000574727	0.0153967	0	0	136	1912
GO:0044257 cellular protein catabolic process	67	0.000591195	6.943	0.082	Biological Process	GO:0044257	cellular protein catabolic process	0.000591195	0.0155262	0	0	67	822
GO:0006468 protein phosphorylation	142	0.000597025	14.715	0.071	Biological Process	GO:0006468	protein phosphorylation	0.000597025	0.0155262	0	0	142	2012
GO:0010562 positive regulation of phosphorus metabolic process	89	0.000598518	9.223	0.077	Biological Process	GO:0010562	positive regulation of phosphorus metabolic process	0.000598518	0.0155262	0	0	89	1161
GO:0045937 positive regulation of phosphate metabolic process	89	0.000598518	9.223	0.077	Biological Process	GO:0045937	positive regulation of phosphate metabolic process	0.000598518	0.0155262	0	0	89	1161
GO:0000079 regulation of cyclin-dependent protein serine/threonine kinase activity	14	0.000600537	1.451	0.147	Biological Process	GO:0000079	regulation of cyclin-dependent protein serine/threonine kinase activity	0.000600537	0.0155262	0	0	14	95
GO:2000241 regulation of reproductive process	19	0.000601746	1.969	0.125	Biological Process	GO:2000241	regulation of reproductive process	0.000601746	0.0155262	0	0	19	152
GO:0000429 carbon catabolite regulation of transcription from RNA polymerase II promoter	3	0.000615532	0.311	0.75	Biological Process	GO:0000429	carbon catabolite regulation of transcription from RNA polymerase II promoter	0.000615532	0.0155262	0	0	3	4
GO:0000436 carbon catabolite activation of transcription from RNA polymerase II promoter	3	0.000615532	0.311	0.75	Biological Process	GO:0000436	carbon catabolite activation of transcription from RNA polymerase II promoter	0.000615532	0.0155262	0	0	3	4
GO:0001922 B-1 B cell homeostasis	3	0.000615532	0.311	0.75	Biological Process	GO:0001922	B-1 B cell homeostasis	0.000615532	0.0155262	0	0	3	4
GO:0003274 endocardial cushion fusion	3	0.000615532	0.311	0.75	Biological Process	GO:0003274	endocardial cushion fusion	0.000615532	0.0155262	0	0	3	4
GO:0006610 ribosomal protein import into nucleus	3	0.000615532	0.311	0.75	Biological Process	GO:0006610	ribosomal protein import into nucleus	0.000615532	0.0155262	0	0	3	4
GO:0031554 regulation of DNA-templated transcription, termination	3	0.000615532	0.311	0.75	Biological Process	GO:0031554	regulation of DNA-templated transcription, termination	0.000615532	0.0155262	0	0	3	4
GO:0038189 neuropilin signaling pathway	3	0.000615532	0.311	0.75	Biological Process	GO:0038189	neuropilin signaling pathway	0.000615532	0.0155262	0	0	3	4
GO:0045629 negative regulation of T-helper 2 cell differentiation	3	0.000615532	0.311	0.75	Biological Process	GO:0045629	negative regulation of T-helper 2 cell differentiation	0.000615532	0.0155262	0	0	3	4
GO:0072106 regulation of ureteric bud formation	3	0.000615532	0.311	0.75	Biological Process	GO:0072106	regulation of ureteric bud formation	0.000615532	0.0155262	0	0	3	4
GO:0072107 positive regulation of ureteric bud formation	3	0.000615532	0.311	0.75	Biological Process	GO:0072107	positive regulation of ureteric bud formation	0.000615532	0.0155262	0	0	3	4
GO:0090215 regulation of 1-phosphatidylinositol-4-phosphate 5-kinase activity	3	0.000615532	0.311	0.75	Biological Process	GO:0090215	regulation of 1-phosphatidylinositol-4-phosphate 5-kinase activity	0.000615532	0.0155262	0	0	3	4
GO:2001029 regulation of cellular glucuronidation	3	0.000615532	0.311	0.75	Biological Process	GO:2001029	regulation of cellular glucuronidation	0.000615532	0.0155262	0	0	3	4
GO:0006928 movement of cell or subcellular component	153	0.000633075	15.855	0.07	Biological Process	GO:0006928	movement of cell or subcellular component	0.000633075	0.0158774	0	0	153	2196
GO:0050673 epithelial cell proliferation	38	0.00063498	3.938	0.095	Biological Process	GO:0050673	epithelial cell proliferation	0.00063498	0.0158774	0	0	38	401
GO:0071417 cellular response to organonitrogen compound	52	0.000636967	5.389	0.087	Biological Process	GO:0071417	cellular response to organonitrogen compound	0.000636967	0.0158774	0	0	52	601
GO:0032446 protein modification by small protein conjugation	77	0.000637628	7.979	0.079	Biological Process	GO:0032446	protein modification by small protein conjugation	0.000637628	0.0158774	0	0	77	977
GO:0009719 response to endogenous stimulus	122	0.00066446	12.642	0.072	Biological Process	GO:0009719	response to endogenous stimulus	0.00066446	0.0164926	0	0	122	1691
GO:0062014 negative regulation of small molecule metabolic process	15	0.000667545	1.554	0.14	Biological Process	GO:0062014	negative regulation of small molecule metabolic process	0.000667545	0.0165164	0	0	15	107
GO:0010033 response to organic substance	219	0.000675126	22.694	0.066	Biological Process	GO:0010033	response to organic substance	0.000675126	0.016634	0	0	219	3309
GO:0090183 regulation of kidney development	10	0.000676581	1.036	0.182	Biological Process	GO:0090183	regulation of kidney development	0.000676581	0.016634	0	0	10	55
GO:0051865 protein autoubiquitination	12	0.000685661	1.244	0.16	Biological Process	GO:0051865	protein autoubiquitination	0.000685661	0.0168041	0	0	12	75
GO:0009888 tissue development	145	0.000699383	15.026	0.07	Biological Process	GO:0009888	tissue development	0.000699383	0.0170865	0	0	145	2069
GO:0048514 blood vessel morphogenesis	52	0.000713465	5.389	0.086	Biological Process	GO:0048514	blood vessel morphogenesis	0.000713465	0.0173759	0	0	52	604
GO:0051726 regulation of cell cycle	91	0.000734086	9.43	0.076	Biological Process	GO:0051726	regulation of cell cycle	0.000734086	0.0178222	0	0	91	1200
GO:0055007 cardiac muscle cell differentiation	15	0.000737068	1.554	0.139	Biological Process	GO:0055007	cardiac muscle cell differentiation	0.000737068	0.0178389	0	0	15	108
GO:0048665 neuron fate specification	7	0.000748519	0.725	0.241	Biological Process	GO:0048665	neuron fate specification	0.000748519	0.01802	0	0	7	29
GO:0048638 regulation of developmental growth	32	0.000749188	3.316	0.099	Biological Process	GO:0048638	regulation of developmental growth	0.000749188	0.01802	0	0	32	322
GO:0070848 response to growth factor	60	0.00077851	6.218	0.083	Biological Process	GO:0070848	response to growth factor	0.00077851	0.0186674	0	0	60	725
GO:0046483 heterocycle metabolic process	382	0.000781751	39.585	0.062	Biological Process	GO:0046483	heterocycle metabolic process	0.000781751	0.0186875	0	0	382	6171
GO:0007411 axon guidance	29	0.000802234	3.005	0.102	Biological Process	GO:0007411	axon guidance	0.000802234	0.0191183	0	0	29	283
GO:0060419 heart growth	13	0.000814138	1.347	0.149	Biological Process	GO:0060419	heart growth	0.000814138	0.0193426	0	0	13	87
GO:0019538 protein metabolic process	375	0.000823974	38.86	0.062	Biological Process	GO:0019538	protein metabolic process	0.000823974	0.0195166	0	0	375	6050
GO:1903530 regulation of secretion by cell	50	0.000838409	5.181	0.086	Biological Process	GO:1903530	regulation of secretion by cell	0.000838409	0.0197982	0	0	50	579
GO:0048583 regulation of response to stimulus	283	0.000844542	29.326	0.064	Biological Process	GO:0048583	regulation of response to stimulus	0.000844542	0.0198826	0	0	283	4428
GO:0097485 neuron projection guidance	29	0.000848388	3.005	0.102	Biological Process	GO:0097485	neuron projection guidance	0.000848388	0.0199128	0	0	29	284
GO:0002070 epithelial cell maturation	5	0.000894545	0.518	0.333	Biological Process	GO:0002070	epithelial cell maturation	0.000894545	0.020776	0	0	5	15
GO:0023019 signal transduction involved in regulation of gene expression	6	0.000895862	0.622	0.273	Biological Process	GO:0023019	signal transduction involved in regulation of gene expression	0.000895862	0.020776	0	0	6	22
GO:0061213 positive regulation of mesonephros development	6	0.000895862	0.622	0.273	Biological Process	GO:0061213	positive regulation of mesonephros development	0.000895862	0.020776	0	0	6	22
GO:0070102 interleukin-6-mediated signaling pathway	6	0.000895862	0.622	0.273	Biological Process	GO:0070102	interleukin-6-mediated signaling pathway	0.000895862	0.020776	0	0	6	22
GO:0048008 platelet-derived growth factor receptor signaling pathway	10	0.000905433	1.036	0.175	Biological Process	GO:0048008	platelet-derived growth factor receptor signaling pathway	0.000905433	0.0208762	0	0	10	57
GO:0010467 gene expression	355	0.000905558	36.788	0.062	Biological Process	GO:0010467	gene expression	0.000905558	0.0208762	0	0	355	5701
GO:0071705 nitrogen compound transport	152	0.000910632	15.751	0.069	Biological Process	GO:0071705	nitrogen compound transport	0.000910632	0.0209311	0	0	152	2198
GO:0019941 modification-dependent protein catabolic process	56	0.000915846	5.803	0.084	Biological Process	GO:0019941	modification-dependent protein catabolic process	0.000915846	0.0209564	0	0	56	670
GO:0051603 proteolysis involved in cellular protein catabolic process	62	0.00091713	6.425	0.082	Biological Process	GO:0051603	proteolysis involved in cellular protein catabolic process	0.00091713	0.0209564	0	0	62	760
GO:0050769 positive regulation of neurogenesis	43	0.000921256	4.456	0.09	Biological Process	GO:0050769	positive regulation of neurogenesis	0.000921256	0.020989	0	0	43	480
GO:0045859 regulation of protein kinase activity	64	0.000939495	6.632	0.081	Biological Process	GO:0045859	regulation of protein kinase activity	0.000939495	0.0213419	0	0	64	791
GO:0001764 neuron migration	19	0.000968495	1.969	0.12	Biological Process	GO:0001764	neuron migration	0.000968495	0.0219366	0	0	19	158
GO:0030335 positive regulation of cell migration	46	0.000988441	4.767	0.088	Biological Process	GO:0030335	positive regulation of cell migration	0.000988441	0.0223233	0	0	46	525
GO:0045746 negative regulation of Notch signaling pathway	8	0.00101337	0.829	0.205	Biological Process	GO:0045746	negative regulation of Notch signaling pathway	0.00101337	0.0228198	0	0	8	39
GO:0007507 heart development	49	0.00103705	5.078	0.086	Biological Process	GO:0007507	heart development	0.00103705	0.0232857	0	0	49	570
GO:0008104 protein localization	183	0.00106044	18.964	0.067	Biological Process	GO:0008104	protein localization	0.00106044	0.0237421	0	0	183	2725
GO:0023052 signaling	410	0.00108872	42.487	0.061	Biological Process	GO:0023052	signaling	0.00108872	0.0243054	0	0	410	6699
GO:0021510 spinal cord development	14	0.00111493	1.451	0.139	Biological Process	GO:0021510	spinal cord development	0.00111493	0.0247693	0	0	14	101
GO:0033036 macromolecule localization	205	0.00111588	21.244	0.066	Biological Process	GO:0033036	macromolecule localization	0.00111588	0.0247693	0	0	205	3101
GO:0009894 regulation of catabolic process	81	0.00111935	8.394	0.076	Biological Process	GO:0009894	regulation of catabolic process	0.00111935	0.0247755	0	0	81	1059
GO:0051716 cellular response to stimulus	463	0.00112875	47.979	0.06	Biological Process	GO:0051716	cellular response to stimulus	0.00112875	0.0249126	0	0	463	7661
GO:0021795 cerebral cortex cell migration	9	0.00115303	0.933	0.184	Biological Process	GO:0021795	cerebral cortex cell migration	0.00115303	0.0253047	0	0	9	49
GO:0031018 endocrine pancreas development	9	0.00115303	0.933	0.184	Biological Process	GO:0031018	endocrine pancreas development	0.00115303	0.0253047	0	0	9	49
GO:0071230 cellular response to amino acid stimulus	11	0.00116843	1.14	0.159	Biological Process	GO:0071230	cellular response to amino acid stimulus	0.00116843	0.0255704	0	0	11	69
GO:0006887 exocytosis	71	0.0011955	7.358	0.078	Biological Process	GO:0006887	exocytosis	0.0011955	0.0260476	0	0	71	906
GO:0007154 cell communication	411	0.00120287	42.591	0.061	Biological Process	GO:0007154	cell communication	0.00120287	0.0260476	0	0	411	6725
GO:0006511 ubiquitin-dependent protein catabolic process	55	0.00120334	5.699	0.083	Biological Process	GO:0006511	ubiquitin-dependent protein catabolic process	0.00120334	0.0260476	0	0	55	663
GO:0010498 proteasomal protein catabolic process	44	0.00120364	4.56	0.088	Biological Process	GO:0010498	proteasomal protein catabolic process	0.00120364	0.0260476	0	0	44	501
GO:0033674 positive regulation of kinase activity	51	0.00122464	5.285	0.084	Biological Process	GO:0033674	positive regulation of kinase activity	0.00122464	0.0264284	0	0	51	604
GO:0044265 cellular macromolecule catabolic process	92	0.00122948	9.534	0.074	Biological Process	GO:0044265	cellular macromolecule catabolic process	0.00122948	0.0264594	0	0	92	1236
GO:0051962 positive regulation of nervous system development	47	0.0012657	4.87	0.086	Biological Process	GO:0051962	positive regulation of nervous system development	0.0012657	0.0271636	0	0	47	546
GO:0001707 mesoderm formation	11	0.00131947	1.14	0.157	Biological Process	GO:0001707	mesoderm formation	0.00131947	0.0282396	0	0	11	70
GO:0043632 modification-dependent macromolecule catabolic process	56	0.00133234	5.803	0.082	Biological Process	GO:0043632	modification-dependent macromolecule catabolic process	0.00133234	0.0283837	0	0	56	681
GO:0008643 carbohydrate transport	18	0.00133351	1.865	0.12	Biological Process	GO:0008643	carbohydrate transport	0.00133351	0.0283837	0	0	18	150
GO:0045732 positive regulation of protein catabolic process	25	0.00133869	2.591	0.105	Biological Process	GO:0045732	positive regulation of protein catabolic process	0.00133869	0.0284161	0	0	25	239
GO:0048863 stem cell differentiation	27	0.00137492	2.798	0.102	Biological Process	GO:0048863	stem cell differentiation	0.00137492	0.0290356	0	0	27	266
GO:0071363 cellular response to growth factor stimulus	57	0.00137535	5.907	0.082	Biological Process	GO:0071363	cellular response to growth factor stimulus	0.00137535	0.0290356	0	0	57	697
GO:0045922 negative regulation of fatty acid metabolic process	7	0.00139988	0.725	0.219	Biological Process	GO:0045922	negative regulation of fatty acid metabolic process	0.00139988	0.0294391	0	0	7	32
GO:0021800 cerebral cortex tangential migration	4	0.00140204	0.415	0.4	Biological Process	GO:0021800	cerebral cortex tangential migration	0.00140204	0.0294391	0	0	4	10
GO:0071702 organic substance transport	175	0.00144372	18.135	0.067	Biological Process	GO:0071702	organic substance transport	0.00144372	0.0298706	0	0	175	2608
GO:0048534 hematopoietic or lymphoid organ development	75	0.00145626	7.772	0.077	Biological Process	GO:0048534	hematopoietic or lymphoid organ development	0.00145626	0.0298706	0	0	75	975
GO:0042692 muscle cell differentiation	34	0.00145666	3.523	0.094	Biological Process	GO:0042692	muscle cell differentiation	0.00145666	0.0298706	0	0	34	363
GO:0051347 positive regulation of transferase activity	56	0.0014717	5.803	0.082	Biological Process	GO:0051347	positive regulation of transferase activity	0.0014717	0.0298706	0	0	56	684
GO:0001759 organ induction	6	0.0014722	0.622	0.25	Biological Process	GO:0001759	organ induction	0.0014722	0.0298706	0	0	6	24
GO:0021895 cerebral cortex neuron differentiation	6	0.0014722	0.622	0.25	Biological Process	GO:0021895	cerebral cortex neuron differentiation	0.0014722	0.0298706	0	0	6	24
GO:0003284 septum primum development	3	0.00147642	0.311	0.6	Biological Process	GO:0003284	septum primum development	0.00147642	0.0298706	0	0	3	5
GO:0003289 atrial septum primum morphogenesis	3	0.00147642	0.311	0.6	Biological Process	GO:0003289	atrial septum primum morphogenesis	0.00147642	0.0298706	0	0	3	5
GO:0030047 actin modification	3	0.00147642	0.311	0.6	Biological Process	GO:0030047	actin modification	0.00147642	0.0298706	0	0	3	5
GO:0045990 carbon catabolite regulation of transcription	3	0.00147642	0.311	0.6	Biological Process	GO:0045990	carbon catabolite regulation of transcription	0.00147642	0.0298706	0	0	3	5
GO:0045991 carbon catabolite activation of transcription	3	0.00147642	0.311	0.6	Biological Process	GO:0045991	carbon catabolite activation of transcription	0.00147642	0.0298706	0	0	3	5
GO:0060708 spongiotrophoblast differentiation	3	0.00147642	0.311	0.6	Biological Process	GO:0060708	spongiotrophoblast differentiation	0.00147642	0.0298706	0	0	3	5
GO:0061343 cell adhesion involved in heart morphogenesis	3	0.00147642	0.311	0.6	Biological Process	GO:0061343	cell adhesion involved in heart morphogenesis	0.00147642	0.0298706	0	0	3	5
GO:0061551 trigeminal ganglion development	3	0.00147642	0.311	0.6	Biological Process	GO:0061551	trigeminal ganglion development	0.00147642	0.0298706	0	0	3	5
GO:0001657 ureteric bud development	13	0.00153026	1.347	0.14	Biological Process	GO:0001657	ureteric bud development	0.00153026	0.0307672	0	0	13	93
GO:0007589 body fluid secretion	13	0.00153026	1.347	0.14	Biological Process	GO:0007589	body fluid secretion	0.00153026	0.0307672	0	0	13	93
GO:0031401 positive regulation of protein modification process	92	0.00153262	9.534	0.074	Biological Process	GO:0031401	positive regulation of protein modification process	0.00153262	0.0307672	0	0	92	1245
GO:0007498 mesoderm development	16	0.00157532	1.658	0.125	Biological Process	GO:0007498	mesoderm development	0.00157532	0.031543	0	0	16	128
GO:0005996 monosaccharide metabolic process	29	0.00161131	3.005	0.098	Biological Process	GO:0005996	monosaccharide metabolic process	0.00161131	0.0321805	0	0	29	296
GO:0017157 regulation of exocytosis	23	0.00161945	2.383	0.106	Biological Process	GO:0017157	regulation of exocytosis	0.00161945	0.0322603	0	0	23	216
GO:0048332 mesoderm morphogenesis	11	0.00166974	1.14	0.153	Biological Process	GO:0048332	mesoderm morphogenesis	0.00166974	0.0331769	0	0	11	72
GO:0021543 pallium development	20	0.00167452	2.073	0.112	Biological Process	GO:0021543	pallium development	0.00167452	0.033187	0	0	20	178
GO:0072163 mesonephric epithelium development	13	0.00168944	1.347	0.138	Biological Process	GO:0072163	mesonephric epithelium development	0.00168944	0.0333128	0	0	13	94
GO:0072164 mesonephric tubule development	13	0.00168944	1.347	0.138	Biological Process	GO:0072164	mesonephric tubule development	0.00168944	0.0333128	0	0	13	94
GO:0008284 positive regulation of cell proliferation	72	0.0017046	7.461	0.077	Biological Process	GO:0008284	positive regulation of cell proliferation	0.0017046	0.0333393	0	0	72	934
GO:0099504 synaptic vesicle cycle	21	0.00170592	2.176	0.11	Biological Process	GO:0099504	synaptic vesicle cycle	0.00170592	0.0333393	0	0	21	191
GO:0001892 embryonic placenta development	12	0.00170794	1.244	0.145	Biological Process	GO:0001892	embryonic placenta development	0.00170794	0.0333393	0	0	12	83
GO:0009953 dorsal/ventral pattern formation	12	0.00170794	1.244	0.145	Biological Process	GO:0009953	dorsal/ventral pattern formation	0.00170794	0.0333393	0	0	12	83
GO:0030163 protein catabolic process	75	0.00171477	7.772	0.076	Biological Process	GO:0030163	protein catabolic process	0.00171477	0.0333886	0	0	75	981
GO:1901185 negative regulation of ERBB signaling pathway	9	0.00178481	0.933	0.173	Biological Process	GO:1901185	negative regulation of ERBB signaling pathway	0.00178481	0.0346655	0	0	9	52
GO:0051897 positive regulation of protein kinase B signaling	20	0.00179141	2.073	0.112	Biological Process	GO:0051897	positive regulation of protein kinase B signaling	0.00179141	0.034707	0	0	20	179
GO:1901653 cellular response to peptide	36	0.00180599	3.731	0.091	Biological Process	GO:1901653	cellular response to peptide	0.00180599	0.0349023	0	0	36	396
GO:0043410 positive regulation of MAPK cascade	46	0.00181343	4.767	0.085	Biological Process	GO:0043410	positive regulation of MAPK cascade	0.00181343	0.0349591	0	0	46	541
GO:0001934 positive regulation of protein phosphorylation	77	0.00184151	7.979	0.076	Biological Process	GO:0001934	positive regulation of protein phosphorylation	0.00184151	0.0353803	0	0	77	1015
GO:0060485 mesenchyme development	28	0.00184438	2.902	0.098	Biological Process	GO:0060485	mesenchyme development	0.00184438	0.0353803	0	0	28	285
GO:0061217 regulation of mesonephros development	6	0.00184902	0.622	0.24	Biological Process	GO:0061217	regulation of mesonephros development	0.00184902	0.0353818	0	0	6	25
GO:0043069 negative regulation of programmed cell death	70	0.00185759	7.254	0.077	Biological Process	GO:0043069	negative regulation of programmed cell death	0.00185759	0.0354586	0	0	70	906
GO:0031331 positive regulation of cellular catabolic process	37	0.00186497	3.834	0.09	Biological Process	GO:0031331	positive regulation of cellular catabolic process	0.00186497	0.0355122	0	0	37	411
GO:2000300 regulation of synaptic vesicle exocytosis	11	0.00187139	1.14	0.151	Biological Process	GO:2000300	regulation of synaptic vesicle exocytosis	0.00187139	0.0355473	0	0	11	73
GO:1905332 positive regulation of morphogenesis of an epithelium	8	0.00197074	0.829	0.186	Biological Process	GO:1905332	positive regulation of morphogenesis of an epithelium	0.00197074	0.0373431	0	0	8	43
GO:0038127 ERBB signaling pathway	17	0.00198285	1.762	0.119	Biological Process	GO:0038127	ERBB signaling pathway	0.00198285	0.0374811	0	0	17	143
GO:0070997 neuron death	33	0.00200869	3.42	0.093	Biological Process	GO:0070997	neuron death	0.00200869	0.0377619	0	0	33	356
GO:0023061 signal release	40	0.00201011	4.145	0.088	Biological Process	GO:0023061	signal release	0.00201011	0.0377619	0	0	40	456
GO:0071840 cellular component organization or biogenesis	422	0.00201229	43.731	0.061	Biological Process	GO:0071840	cellular component organization or biogenesis	0.00201229	0.0377619	0	0	422	6966
GO:0007369 gastrulation	20	0.00204606	2.073	0.11	Biological Process	GO:0007369	gastrulation	0.00204606	0.0382441	0	0	20	181
GO:0043161 proteasome-mediated ubiquitin-dependent protein catabolic process	39	0.00204782	4.041	0.088	Biological Process	GO:0043161	proteasome-mediated ubiquitin-dependent protein catabolic process	0.00204782	0.0382441	0	0	39	442
GO:0060348 bone development	22	0.0020708	2.28	0.106	Biological Process	GO:0060348	bone development	0.0020708	0.0385805	0	0	22	207
GO:2000049 positive regulation of cell-cell adhesion mediated by cadherin	4	0.00210881	0.415	0.364	Biological Process	GO:2000049	positive regulation of cell-cell adhesion mediated by cadherin	0.00210881	0.039101	0	0	4	11
GO:2000786 positive regulation of autophagosome assembly	4	0.00210881	0.415	0.364	Biological Process	GO:2000786	positive regulation of autophagosome assembly	0.00210881	0.039101	0	0	4	11
GO:1901214 regulation of neuron death	30	0.00219508	3.109	0.095	Biological Process	GO:1901214	regulation of neuron death	0.00219508	0.0406037	0	0	30	316
GO:0021517 ventral spinal cord development	8	0.00229589	0.829	0.182	Biological Process	GO:0021517	ventral spinal cord development	0.00229589	0.0422672	0	0	8	44
GO:0045646 regulation of erythrocyte differentiation	8	0.00229589	0.829	0.182	Biological Process	GO:0045646	regulation of erythrocyte differentiation	0.00229589	0.0422672	0	0	8	44
GO:0001706 endoderm formation	9	0.00234142	0.933	0.167	Biological Process	GO:0001706	endoderm formation	0.00234142	0.0429514	0	0	9	54
GO:0035270 endocrine system development	16	0.0023482	1.658	0.12	Biological Process	GO:0035270	endocrine system development	0.0023482	0.0429514	0	0	16	133
GO:0032268 regulation of cellular protein metabolic process	177	0.00234964	18.342	0.066	Biological Process	GO:0032268	regulation of cellular protein metabolic process	0.00234964	0.0429514	0	0	177	2671
GO:0007173 epidermal growth factor receptor signaling pathway	15	0.00236229	1.554	0.124	Biological Process	GO:0007173	epidermal growth factor receptor signaling pathway	0.00236229	0.0429803	0	0	15	121
GO:0022612 gland morphogenesis	15	0.00236229	1.554	0.124	Biological Process	GO:0022612	gland morphogenesis	0.00236229	0.0429803	0	0	15	121
GO:2000147 positive regulation of cell motility	46	0.00241642	4.767	0.084	Biological Process	GO:2000147	positive regulation of cell motility	0.00241642	0.0438625	0	0	46	549
GO:0001823 mesonephros development	13	0.00246931	1.347	0.133	Biological Process	GO:0001823	mesonephros development	0.00246931	0.0447181	0	0	13	98
GO:0007267 cell-cell signaling	118	0.00247827	12.228	0.07	Biological Process	GO:0007267	cell-cell signaling	0.00247827	0.0447759	0	0	118	1688
GO:0014855 striated muscle cell proliferation	10	0.00253659	1.036	0.154	Biological Process	GO:0014855	striated muscle cell proliferation	0.00253659	0.0453732	0	0	10	65
GO:0022029 telencephalon cell migration	10	0.00253659	1.036	0.154	Biological Process	GO:0022029	telencephalon cell migration	0.00253659	0.0453732	0	0	10	65
GO:0048645 animal organ formation	10	0.00253659	1.036	0.154	Biological Process	GO:0048645	animal organ formation	0.00253659	0.0453732	0	0	10	65
GO:0016079 synaptic vesicle exocytosis	14	0.00254375	1.451	0.127	Biological Process	GO:0016079	synaptic vesicle exocytosis	0.00254375	0.0453732	0	0	14	110
GO:0060560 developmental growth involved in morphogenesis	24	0.00254504	2.487	0.101	Biological Process	GO:0060560	developmental growth involved in morphogenesis	0.00254504	0.0453732	0	0	24	237
GO:0060548 negative regulation of cell death	75	0.00254637	7.772	0.075	Biological Process	GO:0060548	negative regulation of cell death	0.00254637	0.0453732	0	0	75	996
GO:0009798 axis specification	12	0.00256527	1.244	0.138	Biological Process	GO:0009798	axis specification	0.00256527	0.0456055	0	0	12	87
GO:0002520 immune system development	77	0.00257601	7.979	0.075	Biological Process	GO:0002520	immune system development	0.00257601	0.0456919	0	0	77	1028
GO:0008344 adult locomotory behavior	11	0.00259816	1.14	0.145	Biological Process	GO:0008344	adult locomotory behavior	0.00259816	0.0459798	0	0	11	76
GO:0044248 cellular catabolic process	165	0.00263753	17.098	0.067	Biological Process	GO:0044248	cellular catabolic process	0.00263753	0.0465704	0	0	165	2475
GO:0045747 positive regulation of Notch signaling pathway	9	0.00266714	0.933	0.164	Biological Process	GO:0045747	positive regulation of Notch signaling pathway	0.00266714	0.0468802	0	0	9	55
GO:2000179 positive regulation of neural precursor cell proliferation	9	0.00266714	0.933	0.164	Biological Process	GO:2000179	positive regulation of neural precursor cell proliferation	0.00266714	0.0468802	0	0	9	55
GO:0051272 positive regulation of cellular component movement	47	0.00269132	4.87	0.083	Biological Process	GO:0051272	positive regulation of cellular component movement	0.00269132	0.0471983	0	0	47	567
GO:0018108 peptidyl-tyrosine phosphorylation	34	0.00271143	3.523	0.09	Biological Process	GO:0018108	peptidyl-tyrosine phosphorylation	0.00271143	0.047444	0	0	34	377
GO:0001501 skeletal system development	43	0.00273219	4.456	0.085	Biological Process	GO:0001501	skeletal system development	0.00273219	0.0476997	0	0	43	508
GO:1901565 organonitrogen compound catabolic process	98	0.00276133	10.155	0.072	Biological Process	GO:1901565	organonitrogen compound catabolic process	0.00276133	0.0481003	0	0	98	1367
GO:0060706 cell differentiation involved in embryonic placenta development	6	0.0028163	0.622	0.222	Biological Process	GO:0060706	cell differentiation involved in embryonic placenta development	0.0028163	0.0482737	0	0	6	27
GO:0051781 positive regulation of cell division	12	0.00282684	1.244	0.136	Biological Process	GO:0051781	positive regulation of cell division	0.00282684	0.0482737	0	0	12	88
GO:0021886 hypothalamus gonadotrophin-releasing hormone neuron differentiation	3	0.00283341	0.311	0.5	Biological Process	GO:0021886	hypothalamus gonadotrophin-releasing hormone neuron differentiation	0.00283341	0.0482737	0	0	3	6
GO:0021888 hypothalamus gonadotrophin-releasing hormone neuron development	3	0.00283341	0.311	0.5	Biological Process	GO:0021888	hypothalamus gonadotrophin-releasing hormone neuron development	0.00283341	0.0482737	0	0	3	6
GO:0060676 ureteric bud formation	3	0.00283341	0.311	0.5	Biological Process	GO:0060676	ureteric bud formation	0.00283341	0.0482737	0	0	3	6
GO:0061074 regulation of neural retina development	3	0.00283341	0.311	0.5	Biological Process	GO:0061074	regulation of neural retina development	0.00283341	0.0482737	0	0	3	6
GO:0061550 cranial ganglion development	3	0.00283341	0.311	0.5	Biological Process	GO:0061550	cranial ganglion development	0.00283341	0.0482737	0	0	3	6
GO:0097475 motor neuron migration	3	0.00283341	0.311	0.5	Biological Process	GO:0097475	motor neuron migration	0.00283341	0.0482737	0	0	3	6
GO:1990569 UDP-N-acetylglucosamine transmembrane transport	3	0.00283341	0.311	0.5	Biological Process	GO:1990569	UDP-N-acetylglucosamine transmembrane transport	0.00283341	0.0482737	0	0	3	6
GO:2000618 regulation of histone H4-K16 acetylation	3	0.00283341	0.311	0.5	Biological Process	GO:2000618	regulation of histone H4-K16 acetylation	0.00283341	0.0482737	0	0	3	6
GO:0051046 regulation of secretion	52	0.00285132	5.389	0.081	Biological Process	GO:0051046	regulation of secretion	0.00285132	0.0484724	0	0	52	644
GO:0017156 calcium ion regulated exocytosis	17	0.0028599	1.762	0.115	Biological Process	GO:0017156	calcium ion regulated exocytosis	0.0028599	0.0485121	0	0	17	148
GO:0090190 positive regulation of branching involved in ureteric bud morphogenesis	5	0.00288852	0.518	0.263	Biological Process	GO:0090190	positive regulation of branching involved in ureteric bud morphogenesis	0.00288852	0.0488475	0	0	5	19
GO:0002332 transitional stage B cell differentiation	2	0.00295512	0.207	1	Biological Process	GO:0002332	transitional stage B cell differentiation	0.00295512	0.0488475	0	0	2	2
GO:0003312 pancreatic PP cell differentiation	2	0.00295512	0.207	1	Biological Process	GO:0003312	pancreatic PP cell differentiation	0.00295512	0.0488475	0	0	2	2
GO:0003326 pancreatic A cell fate commitment	2	0.00295512	0.207	1	Biological Process	GO:0003326	pancreatic A cell fate commitment	0.00295512	0.0488475	0	0	2	2
GO:0003329 pancreatic PP cell fate commitment	2	0.00295512	0.207	1	Biological Process	GO:0003329	pancreatic PP cell fate commitment	0.00295512	0.0488475	0	0	2	2
GO:0006789 bilirubin conjugation	2	0.00295512	0.207	1	Biological Process	GO:0006789	bilirubin conjugation	0.00295512	0.0488475	0	0	2	2
GO:0007493 endodermal cell fate determination	2	0.00295512	0.207	1	Biological Process	GO:0007493	endodermal cell fate determination	0.00295512	0.0488475	0	0	2	2
GO:0060567 negative regulation of DNA-templated transcription, termination	2	0.00295512	0.207	1	Biological Process	GO:0060567	negative regulation of DNA-templated transcription, termination	0.00295512	0.0488475	0	0	2	2
GO:0060730 regulation of intestinal epithelial structure maintenance	2	0.00295512	0.207	1	Biological Process	GO:0060730	regulation of intestinal epithelial structure maintenance	0.00295512	0.0488475	0	0	2	2
GO:0070366 regulation of hepatocyte differentiation	2	0.00295512	0.207	1	Biological Process	GO:0070366	regulation of hepatocyte differentiation	0.00295512	0.0488475	0	0	2	2
GO:0120191 negative regulation of termination of RNA polymerase II transcription	2	0.00295512	0.207	1	Biological Process	GO:0120191	negative regulation of termination of RNA polymerase II transcription	0.00295512	0.0488475	0	0	2	2
GO:2000805 negative regulation of termination of RNA polymerase II transcription, poly(A)-coupled	2	0.00295512	0.207	1	Biological Process	GO:2000805	negative regulation of termination of RNA polymerase II transcription, poly(A)-coupled	0.00295512	0.0488475	0	0	2	2
GO:0033002 muscle cell proliferation	21	0.00298848	2.176	0.105	Biological Process	GO:0033002	muscle cell proliferation	0.00298848	0.049294	0	0	21	200
GO:0016310 phosphorylation	164	0.00300416	16.995	0.067	Biological Process	GO:0016310	phosphorylation	0.00300416	0.0494477	0	0	164	2466
GO:0007596 blood coagulation	32	0.0030142	3.316	0.091	Biological Process	GO:0007596	blood coagulation	0.0030142	0.0495081	0	0	32	351
GO:0021527 spinal cord association neuron differentiation	4	0.00302794	0.415	0.333	Biological Process	GO:0021527	spinal cord association neuron differentiation	0.00302794	0.0496288	0	0	4	12
GO:0031329 regulation of cellular catabolic process	71	0.00304708	7.358	0.076	Biological Process	GO:0031329	regulation of cellular catabolic process	0.00304708	0.0498373	0	0	71	940
GO:0043484 regulation of RNA splicing	17	0.00306921	1.762	0.114	Biological Process	GO:0043484	regulation of RNA splicing	0.00306921	0.0500938	0	0	17	149
GO:0018212 peptidyl-tyrosine modification	34	0.00307693	3.523	0.089	Biological Process	GO:0018212	peptidyl-tyrosine modification	0.00307693	0.0501147	0	0	34	380
GO:0051147 regulation of muscle cell differentiation	18	0.00314604	1.865	0.111	Biological Process	GO:0051147	regulation of muscle cell differentiation	0.00314604	0.0511331	0	0	18	162
GO:0001655 urogenital system development	31	0.00317244	3.212	0.092	Biological Process	GO:0001655	urogenital system development	0.00317244	0.0513641	0	0	31	338
GO:0072175 epithelial tube formation	16	0.00317348	1.658	0.117	Biological Process	GO:0072175	epithelial tube formation	0.00317348	0.0513641	0	0	16	137
GO:0051049 regulation of transport	123	0.00322471	12.746	0.069	Biological Process	GO:0051049	regulation of transport	0.00322471	0.0520848	0	0	123	1784
GO:0001838 embryonic epithelial tube formation	15	0.00324425	1.554	0.12	Biological Process	GO:0001838	embryonic epithelial tube formation	0.00324425	0.0522917	0	0	15	125
GO:1901360 organic cyclic compound metabolic process	391	0.00326798	40.518	0.061	Biological Process	GO:1901360	organic cyclic compound metabolic process	0.00326798	0.052565	0	0	391	6449
GO:0035148 tube formation	17	0.00329106	1.762	0.113	Biological Process	GO:0035148	tube formation	0.00329106	0.0527181	0	0	17	150
GO:0061351 neural precursor cell proliferation	17	0.00329106	1.762	0.113	Biological Process	GO:0061351	neural precursor cell proliferation	0.00329106	0.0527181	0	0	17	150
GO:0009057 macromolecule catabolic process	104	0.00330565	10.777	0.071	Biological Process	GO:0009057	macromolecule catabolic process	0.00330565	0.0528428	0	0	104	1473
GO:0010243 response to organonitrogen compound	76	0.00337615	7.876	0.074	Biological Process	GO:0010243	response to organonitrogen compound	0.00337615	0.0537018	0	0	76	1023
GO:0003156 regulation of animal organ formation	7	0.00338012	0.725	0.189	Biological Process	GO:0003156	regulation of animal organ formation	0.00338012	0.0537018	0	0	7	37
GO:0010092 specification of animal organ identity	7	0.00338012	0.725	0.189	Biological Process	GO:0010092	specification of animal organ identity	0.00338012	0.0537018	0	0	7	37
GO:1901698 response to nitrogen compound	82	0.00341496	8.497	0.073	Biological Process	GO:1901698	response to nitrogen compound	0.00341496	0.0539256	0	0	82	1119
GO:0018146 keratan sulfate biosynthetic process	6	0.00342198	0.622	0.214	Biological Process	GO:0018146	keratan sulfate biosynthetic process	0.00342198	0.0539256	0	0	6	28
GO:0031954 positive regulation of protein autophosphorylation	6	0.00342198	0.622	0.214	Biological Process	GO:0031954	positive regulation of protein autophosphorylation	0.00342198	0.0539256	0	0	6	28
GO:0044331 cell-cell adhesion mediated by cadherin	6	0.00342198	0.622	0.214	Biological Process	GO:0044331	cell-cell adhesion mediated by cadherin	0.00342198	0.0539256	0	0	6	28
GO:0043066 negative regulation of apoptotic process	67	0.00345354	6.943	0.076	Biological Process	GO:0043066	negative regulation of apoptotic process	0.00345354	0.0543045	0	0	67	882
GO:0120035 regulation of plasma membrane bounded cell projection organization	55	0.00346	5.699	0.079	Biological Process	GO:0120035	regulation of plasma membrane bounded cell projection organization	0.00346	0.0543045	0	0	55	696
GO:0048870 cell motility	119	0.00348668	12.332	0.069	Biological Process	GO:0048870	cell motility	0.00348668	0.0544201	0	0	119	1722
GO:0051674 localization of cell	119	0.00348668	12.332	0.069	Biological Process	GO:0051674	localization of cell	0.00348668	0.0544201	0	0	119	1722
GO:0070371 ERK1 and ERK2 cascade	29	0.00349954	3.005	0.093	Biological Process	GO:0070371	ERK1 and ERK2 cascade	0.00349954	0.0544201	0	0	29	312
GO:0002065 columnar/cuboidal epithelial cell differentiation	15	0.00350256	1.554	0.119	Biological Process	GO:0002065	columnar/cuboidal epithelial cell differentiation	0.00350256	0.0544201	0	0	15	126
GO:0051402 neuron apoptotic process	24	0.00351602	2.487	0.099	Biological Process	GO:0051402	neuron apoptotic process	0.00351602	0.0544201	0	0	24	243
GO:0042059 negative regulation of epidermal growth factor receptor signaling pathway	8	0.00352846	0.829	0.17	Biological Process	GO:0042059	negative regulation of epidermal growth factor receptor signaling pathway	0.00352846	0.0544201	0	0	8	47
GO:0072583 clathrin-dependent endocytosis	8	0.00352846	0.829	0.17	Biological Process	GO:0072583	clathrin-dependent endocytosis	0.00352846	0.0544201	0	0	8	47
GO:0032418 lysosome localization	11	0.00353741	1.14	0.139	Biological Process	GO:0032418	lysosome localization	0.00353741	0.0544201	0	0	11	79
GO:0055017 cardiac muscle tissue growth	11	0.00353741	1.14	0.139	Biological Process	GO:0055017	cardiac muscle tissue growth	0.00353741	0.0544201	0	0	11	79
GO:1902803 regulation of synaptic vesicle transport	11	0.00353741	1.14	0.139	Biological Process	GO:1902803	regulation of synaptic vesicle transport	0.00353741	0.0544201	0	0	11	79
GO:0003407 neural retina development	10	0.00355865	1.036	0.147	Biological Process	GO:0003407	neural retina development	0.00355865	0.0545309	0	0	10	68
GO:0021885 forebrain cell migration	10	0.00355865	1.036	0.147	Biological Process	GO:0021885	forebrain cell migration	0.00355865	0.0545309	0	0	10	68
GO:0007599 hemostasis	32	0.00358205	3.316	0.09	Biological Process	GO:0007599	hemostasis	0.00358205	0.0547814	0	0	32	355
GO:0016049 cell growth	41	0.00359046	4.249	0.084	Biological Process	GO:0016049	cell growth	0.00359046	0.0548021	0	0	41	486
GO:0045860 positive regulation of protein kinase activity	44	0.00364079	4.56	0.083	Biological Process	GO:0045860	positive regulation of protein kinase activity	0.00364079	0.0554613	0	0	44	531
GO:0060749 mammary gland alveolus development	5	0.00368104	0.518	0.25	Biological Process	GO:0060749	mammary gland alveolus development	0.00368104	0.0558554	0	0	5	20
GO:0061377 mammary gland lobule development	5	0.00368104	0.518	0.25	Biological Process	GO:0061377	mammary gland lobule development	0.00368104	0.0558554	0	0	5	20
GO:0009056 catabolic process	181	0.00370546	18.756	0.065	Biological Process	GO:0009056	catabolic process	0.00370546	0.0560138	0	0	181	2768
GO:0002573 myeloid leukocyte differentiation	22	0.00370589	2.28	0.101	Biological Process	GO:0002573	myeloid leukocyte differentiation	0.00370589	0.0560138	0	0	22	217
GO:0050817 coagulation	32	0.00373744	3.316	0.09	Biological Process	GO:0050817	coagulation	0.00373744	0.056381	0	0	32	356
GO:0000578 embryonic axis specification	7	0.00395252	0.725	0.184	Biological Process	GO:0000578	embryonic axis specification	0.00395252	0.0595099	0	0	7	38
GO:0043491 protein kinase B signaling	25	0.0039624	2.591	0.097	Biological Process	GO:0043491	protein kinase B signaling	0.0039624	0.0595433	0	0	25	259
GO:0030099 myeloid cell differentiation	37	0.00399184	3.834	0.086	Biological Process	GO:0030099	myeloid cell differentiation	0.00399184	0.0598699	0	0	37	430
GO:0000082 G1/S transition of mitotic cell cycle	23	0.00402627	2.383	0.099	Biological Process	GO:0000082	G1/S transition of mitotic cell cycle	0.00402627	0.0602699	0	0	23	232
GO:0048538 thymus development	8	0.00403651	0.829	0.167	Biological Process	GO:0048538	thymus development	0.00403651	0.0603071	0	0	8	48
GO:0045926 negative regulation of growth	24	0.00410802	2.487	0.098	Biological Process	GO:0045926	negative regulation of growth	0.00410802	0.0612575	0	0	24	246
GO:0021522 spinal cord motor neuron differentiation	6	0.0041194	0.622	0.207	Biological Process	GO:0021522	spinal cord motor neuron differentiation	0.0041194	0.0613096	0	0	6	29
GO:0031507 heterochromatin assembly	4	0.00418702	0.415	0.308	Biological Process	GO:0031507	heterochromatin assembly	0.00418702	0.06196	0	0	4	13
GO:0044090 positive regulation of vacuole organization	4	0.00418702	0.415	0.308	Biological Process	GO:0044090	positive regulation of vacuole organization	0.00418702	0.06196	0	0	4	13
GO:0072216 positive regulation of metanephros development	4	0.00418702	0.415	0.308	Biological Process	GO:0072216	positive regulation of metanephros development	0.00418702	0.06196	0	0	4	13
GO:0035264 multicellular organism growth	16	0.00422472	1.658	0.113	Biological Process	GO:0035264	multicellular organism growth	0.00422472	0.062399	0	0	16	141
GO:0030334 regulation of cell migration	67	0.00425709	6.943	0.075	Biological Process	GO:0030334	regulation of cell migration	0.00425709	0.0627577	0	0	67	890
GO:0051896 regulation of protein kinase B signaling	23	0.0044727	2.383	0.098	Biological Process	GO:0051896	regulation of protein kinase B signaling	0.0044727	0.0658114	0	0	23	234
GO:0031344 regulation of cell projection organization	55	0.00450806	5.699	0.078	Biological Process	GO:0031344	regulation of cell projection organization	0.00450806	0.0661914	0	0	55	705
GO:0050804 modulation of chemical synaptic transmission	38	0.00451557	3.938	0.085	Biological Process	GO:0050804	modulation of chemical synaptic transmission	0.00451557	0.0661914	0	0	38	448
GO:0050684 regulation of mRNA processing	16	0.00452782	1.658	0.113	Biological Process	GO:0050684	regulation of mRNA processing	0.00452782	0.066246	0	0	16	142
GO:0070317 negative regulation of G0 to G1 transition	7	0.00459546	0.725	0.179	Biological Process	GO:0070317	negative regulation of G0 to G1 transition	0.00459546	0.0667865	0	0	7	39
GO:0021537 telencephalon development	25	0.00459548	2.591	0.095	Biological Process	GO:0021537	telencephalon development	0.00459548	0.0667865	0	0	25	262
GO:0006270 DNA replication initiation	8	0.00459915	0.829	0.163	Biological Process	GO:0006270	DNA replication initiation	0.00459915	0.0667865	0	0	8	49
GO:0060038 cardiac muscle cell proliferation	8	0.00459915	0.829	0.163	Biological Process	GO:0060038	cardiac muscle cell proliferation	0.00459915	0.0667865	0	0	8	49
GO:1903305 regulation of regulated secretory pathway	17	0.00460871	1.762	0.11	Biological Process	GO:1903305	regulation of regulated secretory pathway	0.00460871	0.0668006	0	0	17	155
GO:2000047 regulation of cell-cell adhesion mediated by cadherin	5	0.00461802	0.518	0.238	Biological Process	GO:2000047	regulation of cell-cell adhesion mediated by cadherin	0.00461802	0.0668109	0	0	5	21
GO:0099177 regulation of trans-synaptic signaling	38	0.00468347	3.938	0.085	Biological Process	GO:0099177	regulation of trans-synaptic signaling	0.00468347	0.0676318	0	0	38	449
GO:0003310 pancreatic A cell differentiation	3	0.00475851	0.311	0.429	Biological Process	GO:0003310	pancreatic A cell differentiation	0.00475851	0.0682082	0	0	3	7
GO:0048242 epinephrine secretion	3	0.00475851	0.311	0.429	Biological Process	GO:0048242	epinephrine secretion	0.00475851	0.0682082	0	0	3	7
GO:0060638 mesenchymal-epithelial cell signaling	3	0.00475851	0.311	0.429	Biological Process	GO:0060638	mesenchymal-epithelial cell signaling	0.00475851	0.0682082	0	0	3	7
GO:0060693 regulation of branching involved in salivary gland morphogenesis	3	0.00475851	0.311	0.429	Biological Process	GO:0060693	regulation of branching involved in salivary gland morphogenesis	0.00475851	0.0682082	0	0	3	7
GO:1901800 positive regulation of proteasomal protein catabolic process	14	0.00484539	1.451	0.119	Biological Process	GO:1901800	positive regulation of proteasomal protein catabolic process	0.00484539	0.0693257	0	0	14	118
GO:0001708 cell fate specification	12	0.00488646	1.244	0.128	Biological Process	GO:0001708	cell fate specification	0.00488646	0.0695742	0	0	12	94
GO:0017158 regulation of calcium ion-dependent exocytosis	13	0.00491333	1.347	0.123	Biological Process	GO:0017158	regulation of calcium ion-dependent exocytosis	0.00491333	0.0695742	0	0	13	106
GO:2001237 negative regulation of extrinsic apoptotic signaling pathway	13	0.00491333	1.347	0.123	Biological Process	GO:2001237	negative regulation of extrinsic apoptotic signaling pathway	0.00491333	0.0695742	0	0	13	106
GO:0001782 B cell homeostasis	6	0.0049165	0.622	0.2	Biological Process	GO:0001782	B cell homeostasis	0.0049165	0.0695742	0	0	6	30
GO:0035909 aorta morphogenesis	6	0.0049165	0.622	0.2	Biological Process	GO:0035909	aorta morphogenesis	0.0049165	0.0695742	0	0	6	30
GO:0071875 adrenergic receptor signaling pathway	6	0.0049165	0.622	0.2	Biological Process	GO:0071875	adrenergic receptor signaling pathway	0.0049165	0.0695742	0	0	6	30
GO:0007165 signal transduction	376	0.00492896	38.964	0.06	Biological Process	GO:0007165	signal transduction	0.00492896	0.0696238	0	0	376	6216
GO:0097190 apoptotic signaling pathway	48	0.00514081	4.974	0.08	Biological Process	GO:0097190	apoptotic signaling pathway	0.00514081	0.0724845	0	0	48	602
GO:0051270 regulation of cellular component movement	76	0.00519725	7.876	0.073	Biological Process	GO:0051270	regulation of cellular component movement	0.00519725	0.0731476	0	0	76	1041
GO:0097479 synaptic vesicle localization	17	0.00524437	1.762	0.108	Biological Process	GO:0097479	synaptic vesicle localization	0.00524437	0.0736773	0	0	17	157
GO:0034097 response to cytokine	86	0.00532139	8.912	0.071	Biological Process	GO:0034097	response to cytokine	0.00532139	0.0745013	0	0	86	1203
GO:0008543 fibroblast growth factor receptor signaling pathway	13	0.00532221	1.347	0.121	Biological Process	GO:0008543	fibroblast growth factor receptor signaling pathway	0.00532221	0.0745013	0	0	13	107
GO:2000243 positive regulation of reproductive process	10	0.00540116	1.036	0.139	Biological Process	GO:2000243	positive regulation of reproductive process	0.00540116	0.0752924	0	0	10	72
GO:0000165 MAPK cascade	70	0.00540779	7.254	0.074	Biological Process	GO:0000165	MAPK cascade	0.00540779	0.0752924	0	0	70	947
GO:0023014 signal transduction by protein phosphorylation	70	0.00540779	7.254	0.074	Biological Process	GO:0023014	signal transduction by protein phosphorylation	0.00540779	0.0752924	0	0	70	947
GO:0021700 developmental maturation	26	0.0055689	2.694	0.093	Biological Process	GO:0021700	developmental maturation	0.0055689	0.0770334	0	0	26	280
GO:0006109 regulation of carbohydrate metabolic process	21	0.00557058	2.176	0.1	Biological Process	GO:0006109	regulation of carbohydrate metabolic process	0.00557058	0.0770334	0	0	21	211
GO:0043523 regulation of neuron apoptotic process	21	0.00557058	2.176	0.1	Biological Process	GO:0043523	regulation of neuron apoptotic process	0.00557058	0.0770334	0	0	21	211
GO:0060712 spongiotrophoblast layer development	4	0.00561216	0.415	0.286	Biological Process	GO:0060712	spongiotrophoblast layer development	0.00561216	0.0770334	0	0	4	14
GO:0060911 cardiac cell fate commitment	4	0.00561216	0.415	0.286	Biological Process	GO:0060911	cardiac cell fate commitment	0.00561216	0.0770334	0	0	4	14
GO:0070307 lens fiber cell development	4	0.00561216	0.415	0.286	Biological Process	GO:0070307	lens fiber cell development	0.00561216	0.0770334	0	0	4	14
GO:0097154 GABAergic neuron differentiation	4	0.00561216	0.415	0.286	Biological Process	GO:0097154	GABAergic neuron differentiation	0.00561216	0.0770334	0	0	4	14
GO:1901163 regulation of trophoblast cell migration	4	0.00561216	0.415	0.286	Biological Process	GO:1901163	regulation of trophoblast cell migration	0.00561216	0.0770334	0	0	4	14
GO:0060575 intestinal epithelial cell differentiation	5	0.00571278	0.518	0.227	Biological Process	GO:0060575	intestinal epithelial cell differentiation	0.00571278	0.078001	0	0	5	22
GO:0090189 regulation of branching involved in ureteric bud morphogenesis	5	0.00571278	0.518	0.227	Biological Process	GO:0090189	regulation of branching involved in ureteric bud morphogenesis	0.00571278	0.078001	0	0	5	22
GO:1901522 positive regulation of transcription from RNA polymerase II promoter involved in cellular response to chemical stimulus	5	0.00571278	0.518	0.227	Biological Process	GO:1901522	positive regulation of transcription from RNA polymerase II promoter involved in cellular response to chemical stimulus	0.00571278	0.078001	0	0	5	22
GO:0007265 Ras protein signal transduction	31	0.00574175	3.212	0.088	Biological Process	GO:0007265	Ras protein signal transduction	0.00574175	0.078259	0	0	31	352
GO:0098693 regulation of synaptic vesicle cycle	13	0.00575787	1.347	0.12	Biological Process	GO:0098693	regulation of synaptic vesicle cycle	0.00575787	0.0783414	0	0	13	108
GO:1901184 regulation of ERBB signaling pathway	12	0.00579154	1.244	0.125	Biological Process	GO:1901184	regulation of ERBB signaling pathway	0.00579154	0.0783875	0	0	12	96
GO:1901216 positive regulation of neuron death	12	0.00579154	1.244	0.125	Biological Process	GO:1901216	positive regulation of neuron death	0.00579154	0.0783875	0	0	12	96
GO:1901264 carbohydrate derivative transport	12	0.00579154	1.244	0.125	Biological Process	GO:1901264	carbohydrate derivative transport	0.00579154	0.0783875	0	0	12	96
GO:0007435 salivary gland morphogenesis	6	0.00582122	0.622	0.194	Biological Process	GO:0007435	salivary gland morphogenesis	0.00582122	0.0785074	0	0	6	31
GO:0008045 motor neuron axon guidance	6	0.00582122	0.622	0.194	Biological Process	GO:0008045	motor neuron axon guidance	0.00582122	0.0785074	0	0	6	31
GO:0001525 angiogenesis	42	0.00583071	4.352	0.082	Biological Process	GO:0001525	angiogenesis	0.00583071	0.0785074	0	0	42	515
GO:1901564 organonitrogen compound metabolic process	428	0.00587477	44.352	0.06	Biological Process	GO:1901564	organonitrogen compound metabolic process	0.00587477	0.0789638	0	0	428	7171
GO:1903364 positive regulation of cellular protein catabolic process	17	0.00594979	1.762	0.107	Biological Process	GO:1903364	positive regulation of cellular protein catabolic process	0.00594979	0.0798341	0	0	17	159
GO:0003151 outflow tract morphogenesis	10	0.00596143	1.036	0.137	Biological Process	GO:0003151	outflow tract morphogenesis	0.00596143	0.0798524	0	0	10	73
GO:0045669 positive regulation of osteoblast differentiation	9	0.00606848	0.933	0.145	Biological Process	GO:0045669	positive regulation of osteoblast differentiation	0.00606848	0.0811463	0	0	9	62
GO:0021761 limbic system development	13	0.00622154	1.347	0.119	Biological Process	GO:0021761	limbic system development	0.00622154	0.082969	0	0	13	109
GO:0010975 regulation of neuron projection development	42	0.00622615	4.352	0.081	Biological Process	GO:0010975	regulation of neuron projection development	0.00622615	0.082969	0	0	42	517
GO:0048771 tissue remodeling	18	0.00627848	1.865	0.104	Biological Process	GO:0048771	tissue remodeling	0.00627848	0.0835232	0	0	18	173
GO:0048489 synaptic vesicle transport	16	0.00632109	1.658	0.109	Biological Process	GO:0048489	synaptic vesicle transport	0.00632109	0.0836402	0	0	16	147
GO:0097480 establishment of synaptic vesicle localization	16	0.00632109	1.658	0.109	Biological Process	GO:0097480	establishment of synaptic vesicle localization	0.00632109	0.0836402	0	0	16	147
GO:0021915 neural tube development	17	0.00633035	1.762	0.106	Biological Process	GO:0021915	neural tube development	0.00633035	0.0836402	0	0	17	160
GO:0071695 anatomical structure maturation	17	0.00633035	1.762	0.106	Biological Process	GO:0071695	anatomical structure maturation	0.00633035	0.0836402	0	0	17	160
GO:0051302 regulation of cell division	18	0.0066583	1.865	0.103	Biological Process	GO:0051302	regulation of cell division	0.0066583	0.087824	0	0	18	174
GO:0040017 positive regulation of locomotion	46	0.00667898	4.767	0.079	Biological Process	GO:0040017	positive regulation of locomotion	0.00667898	0.0879475	0	0	46	580
GO:0044843 cell cycle G1/S phase transition	24	0.00671551	2.487	0.094	Biological Process	GO:0044843	cell cycle G1/S phase transition	0.00671551	0.0882427	0	0	24	256
GO:0007423 sensory organ development	45	0.00673479	4.663	0.08	Biological Process	GO:0007423	sensory organ development	0.00673479	0.0882427	0	0	45	565
GO:0071897 DNA biosynthetic process	20	0.00673548	2.073	0.1	Biological Process	GO:0071897	DNA biosynthetic process	0.00673548	0.0882427	0	0	20	201
GO:0002260 lymphocyte homeostasis	9	0.00674706	0.933	0.143	Biological Process	GO:0002260	lymphocyte homeostasis	0.00674706	0.0882456	0	0	9	63
GO:0001667 ameboidal-type cell migration	35	0.00681796	3.627	0.084	Biological Process	GO:0001667	ameboidal-type cell migration	0.00681796	0.0890231	0	0	35	415
GO:0007264 small GTPase mediated signal transduction	42	0.00686161	4.352	0.081	Biological Process	GO:0007264	small GTPase mediated signal transduction	0.00686161	0.0893143	0	0	42	520
GO:0051246 regulation of protein metabolic process	186	0.00687075	19.275	0.064	Biological Process	GO:0051246	regulation of protein metabolic process	0.00687075	0.0893143	0	0	186	2896
GO:0050678 regulation of epithelial cell proliferation	30	0.00687475	3.109	0.088	Biological Process	GO:0050678	regulation of epithelial cell proliferation	0.00687475	0.0893143	0	0	30	342
GO:0030308 negative regulation of cell growth	19	0.00691429	1.969	0.101	Biological Process	GO:0030308	negative regulation of cell growth	0.00691429	0.0895953	0	0	19	188
GO:0032869 cellular response to insulin stimulus	22	0.00697177	2.28	0.096	Biological Process	GO:0032869	cellular response to insulin stimulus	0.00697177	0.0895953	0	0	22	229
GO:0021533 cell differentiation in hindbrain	5	0.00697832	0.518	0.217	Biological Process	GO:0021533	cell differentiation in hindbrain	0.00697832	0.0895953	0	0	5	23
GO:0021854 hypothalamus development	5	0.00697832	0.518	0.217	Biological Process	GO:0021854	hypothalamus development	0.00697832	0.0895953	0	0	5	23
GO:0034390 smooth muscle cell apoptotic process	5	0.00697832	0.518	0.217	Biological Process	GO:0034390	smooth muscle cell apoptotic process	0.00697832	0.0895953	0	0	5	23
GO:0034391 regulation of smooth muscle cell apoptotic process	5	0.00697832	0.518	0.217	Biological Process	GO:0034391	regulation of smooth muscle cell apoptotic process	0.00697832	0.0895953	0	0	5	23
GO:0060444 branching involved in mammary gland duct morphogenesis	5	0.00697832	0.518	0.217	Biological Process	GO:0060444	branching involved in mammary gland duct morphogenesis	0.00697832	0.0895953	0	0	5	23
GO:0006040 amino sugar metabolic process	7	0.00700017	0.725	0.167	Biological Process	GO:0006040	amino sugar metabolic process	0.00700017	0.0895953	0	0	7	42
GO:0038084 vascular endothelial growth factor signaling pathway	7	0.00700017	0.725	0.167	Biological Process	GO:0038084	vascular endothelial growth factor signaling pathway	0.00700017	0.0895953	0	0	7	42
GO:0043406 positive regulation of MAP kinase activity	24	0.00703823	2.487	0.093	Biological Process	GO:0043406	positive regulation of MAP kinase activity	0.00703823	0.0899343	0	0	24	257
GO:1903311 regulation of mRNA metabolic process	30	0.00715548	3.109	0.087	Biological Process	GO:1903311	regulation of mRNA metabolic process	0.00715548	0.0912823	0	0	30	343
GO:0032870 cellular response to hormone stimulus	55	0.00724225	5.699	0.076	Biological Process	GO:0032870	cellular response to hormone stimulus	0.00724225	0.0915251	0	0	55	722
GO:0035881 amacrine cell differentiation	3	0.00730746	0.311	0.375	Biological Process	GO:0035881	amacrine cell differentiation	0.00730746	0.0915251	0	0	3	8
GO:0038089 positive regulation of cell migration by vascular endothelial growth factor signaling pathway	3	0.00730746	0.311	0.375	Biological Process	GO:0038089	positive regulation of cell migration by vascular endothelial growth factor signaling pathway	0.00730746	0.0915251	0	0	3	8
GO:0038114 interleukin-21-mediated signaling pathway	3	0.00730746	0.311	0.375	Biological Process	GO:0038114	interleukin-21-mediated signaling pathway	0.00730746	0.0915251	0	0	3	8
GO:0045647 negative regulation of erythrocyte differentiation	3	0.00730746	0.311	0.375	Biological Process	GO:0045647	negative regulation of erythrocyte differentiation	0.00730746	0.0915251	0	0	3	8
GO:0060947 cardiac vascular smooth muscle cell differentiation	3	0.00730746	0.311	0.375	Biological Process	GO:0060947	cardiac vascular smooth muscle cell differentiation	0.00730746	0.0915251	0	0	3	8
GO:0072172 mesonephric tubule formation	3	0.00730746	0.311	0.375	Biological Process	GO:0072172	mesonephric tubule formation	0.00730746	0.0915251	0	0	3	8
GO:0098756 response to interleukin-21	3	0.00730746	0.311	0.375	Biological Process	GO:0098756	response to interleukin-21	0.00730746	0.0915251	0	0	3	8
GO:0098757 cellular response to interleukin-21	3	0.00730746	0.311	0.375	Biological Process	GO:0098757	cellular response to interleukin-21	0.00730746	0.0915251	0	0	3	8
GO:2000698 positive regulation of epithelial cell differentiation involved in kidney development	3	0.00730746	0.311	0.375	Biological Process	GO:2000698	positive regulation of epithelial cell differentiation involved in kidney development	0.00730746	0.0915251	0	0	3	8
GO:0006810 transport	312	0.00731659	32.332	0.061	Biological Process	GO:0006810	transport	0.00731659	0.0915251	0	0	312	5108
GO:0035635 entry of bacterium into host cell	4	0.00732766	0.415	0.267	Biological Process	GO:0035635	entry of bacterium into host cell	0.00732766	0.0915251	0	0	4	15
GO:0061450 trophoblast cell migration	4	0.00732766	0.415	0.267	Biological Process	GO:0061450	trophoblast cell migration	0.00732766	0.0915251	0	0	4	15
GO:0072132 mesenchyme morphogenesis	8	0.00747016	0.829	0.151	Biological Process	GO:0072132	mesenchyme morphogenesis	0.00747016	0.0931552	0	0	8	53
GO:0070727 cellular macromolecule localization	130	0.0075479	13.472	0.067	Biological Process	GO:0070727	cellular macromolecule localization	0.0075479	0.0939738	0	0	130	1949
GO:0008285 negative regulation of cell proliferation	54	0.00756536	5.596	0.076	Biological Process	GO:0008285	negative regulation of cell proliferation	0.00756536	0.0940405	0	0	54	708
GO:0002793 positive regulation of peptide secretion	17	0.00759176	1.762	0.104	Biological Process	GO:0002793	positive regulation of peptide secretion	0.00759176	0.0942179	0	0	17	163
GO:1903052 positive regulation of proteolysis involved in cellular protein catabolic process	15	0.00762142	1.554	0.109	Biological Process	GO:1903052	positive regulation of proteolysis involved in cellular protein catabolic process	0.00762142	0.0944351	0	0	15	137
GO:0045137 development of primary sexual characteristics	22	0.00769591	2.28	0.095	Biological Process	GO:0045137	development of primary sexual characteristics	0.00769591	0.0952062	0	0	22	231
GO:0007626 locomotory behavior	19	0.00771965	1.969	0.1	Biological Process	GO:0007626	locomotory behavior	0.00771965	0.095348	0	0	19	190
GO:0016192 vesicle-mediated transport	143	0.00774854	14.819	0.066	Biological Process	GO:0016192	vesicle-mediated transport	0.00774854	0.095553	0	0	143	2170
GO:0007229 integrin-mediated signaling pathway	13	0.00779297	1.347	0.116	Biological Process	GO:0007229	integrin-mediated signaling pathway	0.00779297	0.0957968	0	0	13	112
GO:2000278 regulation of DNA biosynthetic process	13	0.00779297	1.347	0.116	Biological Process	GO:2000278	regulation of DNA biosynthetic process	0.00779297	0.0957968	0	0	13	112
GO:0033146 regulation of intracellular estrogen receptor signaling pathway	7	0.00797812	0.725	0.163	Biological Process	GO:0033146	regulation of intracellular estrogen receptor signaling pathway	0.00797812	0.0973907	0	0	7	43
GO:2000648 positive regulation of stem cell proliferation	7	0.00797812	0.725	0.163	Biological Process	GO:2000648	positive regulation of stem cell proliferation	0.00797812	0.0973907	0	0	7	43
GO:0001569 branching involved in blood vessel morphogenesis	6	0.00798531	0.622	0.182	Biological Process	GO:0001569	branching involved in blood vessel morphogenesis	0.00798531	0.0973907	0	0	6	33
GO:0007431 salivary gland development	6	0.00798531	0.622	0.182	Biological Process	GO:0007431	salivary gland development	0.00798531	0.0973907	0	0	6	33
GO:0042339 keratan sulfate metabolic process	6	0.00798531	0.622	0.182	Biological Process	GO:0042339	keratan sulfate metabolic process	0.00798531	0.0973907	0	0	6	33
GO:0098773 skin epidermis development	11	0.00806045	1.14	0.125	Biological Process	GO:0098773	skin epidermis development	0.00806045	0.098153	0	0	11	88
GO:0050730 regulation of peptidyl-tyrosine phosphorylation	24	0.00808374	2.487	0.092	Biological Process	GO:0050730	regulation of peptidyl-tyrosine phosphorylation	0.00808374	0.0982825	0	0	24	260
GO:0034613 cellular protein localization	129	0.00816805	13.368	0.067	Biological Process	GO:0034613	cellular protein localization	0.00816805	0.0983445	0	0	129	1937
GO:0043408 regulation of MAPK cascade	55	0.00827439	5.699	0.076	Biological Process	GO:0043408	regulation of MAPK cascade	0.00827439	0.0983445	0	0	55	727
GO:0003170 heart valve development	9	0.00827715	0.933	0.138	Biological Process	GO:0003170	heart valve development	0.00827715	0.0983445	0	0	9	65
GO:0070936 protein K48-linked ubiquitination	9	0.00827715	0.933	0.138	Biological Process	GO:0070936	protein K48-linked ubiquitination	0.00827715	0.0983445	0	0	9	65
GO:0051047 positive regulation of secretion	28	0.00839333	2.902	0.088	Biological Process	GO:0051047	positive regulation of secretion	0.00839333	0.0983445	0	0	28	318
GO:0048103 somatic stem cell division	5	0.00842731	0.518	0.208	Biological Process	GO:0048103	somatic stem cell division	0.00842731	0.0983445	0	0	5	24
GO:0070828 heterochromatin organization	5	0.00842731	0.518	0.208	Biological Process	GO:0070828	heterochromatin organization	0.00842731	0.0983445	0	0	5	24
GO:2000810 regulation of bicellular tight junction assembly	5	0.00842731	0.518	0.208	Biological Process	GO:2000810	regulation of bicellular tight junction assembly	0.00842731	0.0983445	0	0	5	24
GO:0000430 regulation of transcription from RNA polymerase II promoter by glucose	2	0.00854454	0.207	0.667	Biological Process	GO:0000430	regulation of transcription from RNA polymerase II promoter by glucose	0.00854454	0.0983445	0	0	2	3
GO:0000432 positive regulation of transcription from RNA polymerase II promoter by glucose	2	0.00854454	0.207	0.667	Biological Process	GO:0000432	positive regulation of transcription from RNA polymerase II promoter by glucose	0.00854454	0.0983445	0	0	2	3
GO:0002051 osteoblast fate commitment	2	0.00854454	0.207	0.667	Biological Process	GO:0002051	osteoblast fate commitment	0.00854454	0.0983445	0	0	2	3
GO:0003275 apoptotic process involved in outflow tract morphogenesis	2	0.00854454	0.207	0.667	Biological Process	GO:0003275	apoptotic process involved in outflow tract morphogenesis	0.00854454	0.0983445	0	0	2	3
GO:0021852 pyramidal neuron migration	2	0.00854454	0.207	0.667	Biological Process	GO:0021852	pyramidal neuron migration	0.00854454	0.0983445	0	0	2	3
GO:0030846 termination of RNA polymerase II transcription, poly(A)-coupled	2	0.00854454	0.207	0.667	Biological Process	GO:0030846	termination of RNA polymerase II transcription, poly(A)-coupled	0.00854454	0.0983445	0	0	2	3
GO:0030910 olfactory placode formation	2	0.00854454	0.207	0.667	Biological Process	GO:0030910	olfactory placode formation	0.00854454	0.0983445	0	0	2	3
GO:0036215 response to stem cell factor	2	0.00854454	0.207	0.667	Biological Process	GO:0036215	response to stem cell factor	0.00854454	0.0983445	0	0	2	3
GO:0036216 cellular response to stem cell factor stimulus	2	0.00854454	0.207	0.667	Biological Process	GO:0036216	cellular response to stem cell factor stimulus	0.00854454	0.0983445	0	0	2	3
GO:0038109 Kit signaling pathway	2	0.00854454	0.207	0.667	Biological Process	GO:0038109	Kit signaling pathway	0.00854454	0.0983445	0	0	2	3
GO:0060665 regulation of branching involved in salivary gland morphogenesis by mesenchymal-epithelial signaling	2	0.00854454	0.207	0.667	Biological Process	GO:0060665	regulation of branching involved in salivary gland morphogenesis by mesenchymal-epithelial signaling	0.00854454	0.0983445	0	0	2	3
GO:0071698 olfactory placode development	2	0.00854454	0.207	0.667	Biological Process	GO:0071698	olfactory placode development	0.00854454	0.0983445	0	0	2	3
GO:0071699 olfactory placode morphogenesis	2	0.00854454	0.207	0.667	Biological Process	GO:0071699	olfactory placode morphogenesis	0.00854454	0.0983445	0	0	2	3
GO:0072095 regulation of branch elongation involved in ureteric bud branching	2	0.00854454	0.207	0.667	Biological Process	GO:0072095	regulation of branch elongation involved in ureteric bud branching	0.00854454	0.0983445	0	0	2	3
GO:0090135 actin filament branching	2	0.00854454	0.207	0.667	Biological Process	GO:0090135	actin filament branching	0.00854454	0.0983445	0	0	2	3
GO:0090217 negative regulation of 1-phosphatidylinositol-4-phosphate 5-kinase activity	2	0.00854454	0.207	0.667	Biological Process	GO:0090217	negative regulation of 1-phosphatidylinositol-4-phosphate 5-kinase activity	0.00854454	0.0983445	0	0	2	3
GO:1901491 negative regulation of lymphangiogenesis	2	0.00854454	0.207	0.667	Biological Process	GO:1901491	negative regulation of lymphangiogenesis	0.00854454	0.0983445	0	0	2	3
GO:1902256 regulation of apoptotic process involved in outflow tract morphogenesis	2	0.00854454	0.207	0.667	Biological Process	GO:1902256	regulation of apoptotic process involved in outflow tract morphogenesis	0.00854454	0.0983445	0	0	2	3
GO:1902633 1-phosphatidyl-1D-myo-inositol 4,5-bisphosphate metabolic process	2	0.00854454	0.207	0.667	Biological Process	GO:1902633	1-phosphatidyl-1D-myo-inositol 4,5-bisphosphate metabolic process	0.00854454	0.0983445	0	0	2	3
GO:1902635 1-phosphatidyl-1D-myo-inositol 4,5-bisphosphate biosynthetic process	2	0.00854454	0.207	0.667	Biological Process	GO:1902635	1-phosphatidyl-1D-myo-inositol 4,5-bisphosphate biosynthetic process	0.00854454	0.0983445	0	0	2	3
GO:1903463 regulation of mitotic cell cycle DNA replication	2	0.00854454	0.207	0.667	Biological Process	GO:1903463	regulation of mitotic cell cycle DNA replication	0.00854454	0.0983445	0	0	2	3
GO:1904217 regulation of CDP-diacylglycerol-serine O-phosphatidyltransferase activity	2	0.00854454	0.207	0.667	Biological Process	GO:1904217	regulation of CDP-diacylglycerol-serine O-phosphatidyltransferase activity	0.00854454	0.0983445	0	0	2	3
GO:1904219 positive regulation of CDP-diacylglycerol-serine O-phosphatidyltransferase activity	2	0.00854454	0.207	0.667	Biological Process	GO:1904219	positive regulation of CDP-diacylglycerol-serine O-phosphatidyltransferase activity	0.00854454	0.0983445	0	0	2	3
GO:1904222 positive regulation of serine C-palmitoyltransferase activity	2	0.00854454	0.207	0.667	Biological Process	GO:1904222	positive regulation of serine C-palmitoyltransferase activity	0.00854454	0.0983445	0	0	2	3
GO:1904594 regulation of termination of RNA polymerase II transcription	2	0.00854454	0.207	0.667	Biological Process	GO:1904594	regulation of termination of RNA polymerase II transcription	0.00854454	0.0983445	0	0	2	3
GO:2000111 positive regulation of macrophage apoptotic process	2	0.00854454	0.207	0.667	Biological Process	GO:2000111	positive regulation of macrophage apoptotic process	0.00854454	0.0983445	0	0	2	3
GO:2000619 negative regulation of histone H4-K16 acetylation	2	0.00854454	0.207	0.667	Biological Process	GO:2000619	negative regulation of histone H4-K16 acetylation	0.00854454	0.0983445	0	0	2	3
GO:2000804 regulation of termination of RNA polymerase II transcription, poly(A)-coupled	2	0.00854454	0.207	0.667	Biological Process	GO:2000804	regulation of termination of RNA polymerase II transcription, poly(A)-coupled	0.00854454	0.0983445	0	0	2	3
GO:0045184 establishment of protein localization	129	0.00857663	13.368	0.066	Biological Process	GO:0045184	establishment of protein localization	0.00857663	0.0984924	0	0	129	1940
GO:0071496 cellular response to external stimulus	32	0.00858734	3.316	0.085	Biological Process	GO:0071496	cellular response to external stimulus	0.00858734	0.0984924	0	0	32	377
GO:0048565 digestive tract development	14	0.00859543	1.451	0.111	Biological Process	GO:0048565	digestive tract development	0.00859543	0.0984924	0	0	14	126
GO:0031016 pancreas development	10	0.00866774	1.036	0.13	Biological Process	GO:0031016	pancreas development	0.00866774	0.0991103	0	0	10	77
GO:0072073 kidney epithelium development	15	0.00867487	1.554	0.108	Biological Process	GO:0072073	kidney epithelium development	0.00867487	0.0991103	0	0	15	139
GO:1901700 response to oxygen-containing compound	113	0.00875194	11.71	0.068	Biological Process	GO:1901700	response to oxygen-containing compound	0.00875194	0.0994823	0	0	113	1673
GO:0014812 muscle cell migration	11	0.00875864	1.14	0.124	Biological Process	GO:0014812	muscle cell migration	0.00875864	0.0994823	0	0	11	89
GO:0042058 regulation of epidermal growth factor receptor signaling pathway	11	0.00875864	1.14	0.124	Biological Process	GO:0042058	regulation of epidermal growth factor receptor signaling pathway	0.00875864	0.0994823	0	0	11	89
GO:0042440 pigment metabolic process	11	0.00875864	1.14	0.124	Biological Process	GO:0042440	pigment metabolic process	0.00875864	0.0994823	0	0	11	89
GO:0046777 protein autophosphorylation	22	0.00889616	2.28	0.094	Biological Process	GO:0046777	protein autophosphorylation	0.00889616	0.100897	0	0	22	234
GO:0070372 regulation of ERK1 and ERK2 cascade	26	0.00904334	2.694	0.089	Biological Process	GO:0070372	regulation of ERK1 and ERK2 cascade	0.00904334	0.101933	0	0	26	291
GO:0035272 exocrine system development	7	0.00905314	0.725	0.159	Biological Process	GO:0035272	exocrine system development	0.00905314	0.101933	0	0	7	44
GO:0048286 lung alveolus development	7	0.00905314	0.725	0.159	Biological Process	GO:0048286	lung alveolus development	0.00905314	0.101933	0	0	7	44
GO:0070316 regulation of G0 to G1 transition	7	0.00905314	0.725	0.159	Biological Process	GO:0070316	regulation of G0 to G1 transition	0.00905314	0.101933	0	0	7	44
GO:0070741 response to interleukin-6	7	0.00905314	0.725	0.159	Biological Process	GO:0070741	response to interleukin-6	0.00905314	0.101933	0	0	7	44
GO:0030097 hemopoiesis	68	0.00907272	7.047	0.073	Biological Process	GO:0030097	hemopoiesis	0.00907272	0.102006	0	0	68	937
GO:0071345 cellular response to cytokine stimulus	79	0.00915892	8.187	0.071	Biological Process	GO:0071345	cellular response to cytokine stimulus	0.00915892	0.102826	0	0	79	1115
GO:0007269 neurotransmitter secretion	16	0.00918683	1.658	0.105	Biological Process	GO:0007269	neurotransmitter secretion	0.00918683	0.102904	0	0	16	153
GO:0002576 platelet degranulation	14	0.00919234	1.451	0.11	Biological Process	GO:0002576	platelet degranulation	0.00919234	0.102904	0	0	14	127
GO:0050714 positive regulation of protein secretion	15	0.00924324	1.554	0.107	Biological Process	GO:0050714	positive regulation of protein secretion	0.00924324	0.103071	0	0	15	140
GO:0090596 sensory organ morphogenesis	24	0.00925298	2.487	0.091	Biological Process	GO:0090596	sensory organ morphogenesis	0.00925298	0.103071	0	0	24	263
GO:0021799 cerebral cortex radially oriented cell migration	6	0.00926034	0.622	0.176	Biological Process	GO:0021799	cerebral cortex radially oriented cell migration	0.00926034	0.103071	0	0	6	34
GO:0070306 lens fiber cell differentiation	6	0.00926034	0.622	0.176	Biological Process	GO:0070306	lens fiber cell differentiation	0.00926034	0.103071	0	0	6	34
GO:0002067 glandular epithelial cell differentiation	8	0.00933147	0.829	0.145	Biological Process	GO:0002067	glandular epithelial cell differentiation	0.00933147	0.103393	0	0	8	55
GO:0042987 amyloid precursor protein catabolic process	8	0.00933147	0.829	0.145	Biological Process	GO:0042987	amyloid precursor protein catabolic process	0.00933147	0.103393	0	0	8	55
GO:0060350 endochondral bone morphogenesis	8	0.00933147	0.829	0.145	Biological Process	GO:0060350	endochondral bone morphogenesis	0.00933147	0.103393	0	0	8	55
GO:0072148 epithelial cell fate commitment	4	0.00935579	0.415	0.25	Biological Process	GO:0072148	epithelial cell fate commitment	0.00935579	0.103393	0	0	4	16
GO:0099509 regulation of presynaptic cytosolic calcium ion concentration	4	0.00935579	0.415	0.25	Biological Process	GO:0099509	regulation of presynaptic cytosolic calcium ion concentration	0.00935579	0.103393	0	0	4	16
GO:0006914 autophagy	44	0.00948141	4.56	0.078	Biological Process	GO:0006914	autophagy	0.00948141	0.104484	0	0	44	561
GO:0061919 process utilizing autophagic mechanism	44	0.00948141	4.56	0.078	Biological Process	GO:0061919	process utilizing autophagic mechanism	0.00948141	0.104484	0	0	44	561
GO:0060429 epithelium development	91	0.00968885	9.43	0.069	Biological Process	GO:0060429	epithelium development	0.00968885	0.106619	0	0	91	1314
GO:0006486 protein glycosylation	23	0.00974471	2.383	0.092	Biological Process	GO:0006486	protein glycosylation	0.00974471	0.106855	0	0	23	250
GO:0043413 macromolecule glycosylation	23	0.00974471	2.383	0.092	Biological Process	GO:0043413	macromolecule glycosylation	0.00974471	0.106855	0	0	23	250
GO:0099643 signal release from synapse	16	0.00975164	1.658	0.104	Biological Process	GO:0099643	signal release from synapse	0.00975164	0.106855	0	0	16	154
GO:0001822 kidney development	26	0.009834	2.694	0.089	Biological Process	GO:0001822	kidney development	0.009834	0.107528	0	0	26	293
GO:0030879 mammary gland development	15	0.00984068	1.554	0.106	Biological Process	GO:0030879	mammary gland development	0.00984068	0.107528	0	0	15	141
GO:0033554 cellular response to stress	139	0.00988624	14.404	0.066	Biological Process	GO:0033554	cellular response to stress	0.00988624	0.107874	0	0	139	2118
GO:0016236 macroautophagy	29	0.0100106	3.005	0.086	Biological Process	GO:0016236	macroautophagy	0.0100106	0.109077	0	0	29	337
GO:0021846 cell proliferation in forebrain	5	0.0100719	0.518	0.2	Biological Process	GO:0021846	cell proliferation in forebrain	0.0100719	0.109438	0	0	5	25
GO:0045939 negative regulation of steroid metabolic process	5	0.0100719	0.518	0.2	Biological Process	GO:0045939	negative regulation of steroid metabolic process	0.0100719	0.109438	0	0	5	25
GO:0009952 anterior/posterior pattern specification	20	0.01019	2.073	0.096	Biological Process	GO:0009952	anterior/posterior pattern specification	0.01019	0.110568	0	0	20	209
GO:0021575 hindbrain morphogenesis	7	0.0102305	0.725	0.156	Biological Process	GO:0021575	hindbrain morphogenesis	0.0102305	0.110698	0	0	7	45
GO:0035987 endodermal cell differentiation	7	0.0102305	0.725	0.156	Biological Process	GO:0035987	endodermal cell differentiation	0.0102305	0.110698	0	0	7	45
GO:0021536 diencephalon development	10	0.0103322	1.036	0.127	Biological Process	GO:0021536	diencephalon development	0.0103322	0.111642	0	0	10	79
GO:0043551 regulation of phosphatidylinositol 3-kinase activity	8	0.0103821	0.829	0.143	Biological Process	GO:0043551	regulation of phosphatidylinositol 3-kinase activity	0.0103821	0.112026	0	0	8	56
GO:0010637 negative regulation of mitochondrial fusion	3	0.0105217	0.311	0.333	Biological Process	GO:0010637	negative regulation of mitochondrial fusion	0.0105217	0.112285	0	0	3	9
GO:0021979 hypothalamus cell differentiation	3	0.0105217	0.311	0.333	Biological Process	GO:0021979	hypothalamus cell differentiation	0.0105217	0.112285	0	0	3	9
GO:0023041 neuronal signal transduction	3	0.0105217	0.311	0.333	Biological Process	GO:0023041	neuronal signal transduction	0.0105217	0.112285	0	0	3	9
GO:0032906 transforming growth factor beta2 production	3	0.0105217	0.311	0.333	Biological Process	GO:0032906	transforming growth factor beta2 production	0.0105217	0.112285	0	0	3	9
GO:0032909 regulation of transforming growth factor beta2 production	3	0.0105217	0.311	0.333	Biological Process	GO:0032909	regulation of transforming growth factor beta2 production	0.0105217	0.112285	0	0	3	9
GO:0033034 positive regulation of myeloid cell apoptotic process	3	0.0105217	0.311	0.333	Biological Process	GO:0033034	positive regulation of myeloid cell apoptotic process	0.0105217	0.112285	0	0	3	9
GO:0060281 regulation of oocyte development	3	0.0105217	0.311	0.333	Biological Process	GO:0060281	regulation of oocyte development	0.0105217	0.112285	0	0	3	9
GO:1905879 regulation of oogenesis	3	0.0105217	0.311	0.333	Biological Process	GO:1905879	regulation of oogenesis	0.0105217	0.112285	0	0	3	9
GO:0043010 camera-type eye development	28	0.0106574	2.902	0.086	Biological Process	GO:0043010	camera-type eye development	0.0106574	0.113445	0	0	28	324
GO:0021955 central nervous system neuron axonogenesis	6	0.0106743	0.622	0.171	Biological Process	GO:0021955	central nervous system neuron axonogenesis	0.0106743	0.113445	0	0	6	35
GO:0031128 developmental induction	6	0.0106743	0.622	0.171	Biological Process	GO:0031128	developmental induction	0.0106743	0.113445	0	0	6	35
GO:0034641 cellular nitrogen compound metabolic process	400	0.0108216	41.451	0.059	Biological Process	GO:0034641	cellular nitrogen compound metabolic process	0.0108216	0.114854	0	0	400	6724
GO:0009880 embryonic pattern specification	9	0.0110488	0.933	0.132	Biological Process	GO:0009880	embryonic pattern specification	0.0110488	0.117105	0	0	9	68
GO:0008584 male gonad development	15	0.0111267	1.554	0.105	Biological Process	GO:0008584	male gonad development	0.0111267	0.117771	0	0	15	143
GO:0003158 endothelium development	14	0.0111807	1.451	0.108	Biological Process	GO:0003158	endothelium development	0.0111807	0.118181	0	0	14	130
GO:0003300 cardiac muscle hypertrophy	10	0.0112504	1.036	0.125	Biological Process	GO:0003300	cardiac muscle hypertrophy	0.0112504	0.118284	0	0	10	80
GO:0007492 endoderm development	10	0.0112504	1.036	0.125	Biological Process	GO:0007492	endoderm development	0.0112504	0.118284	0	0	10	80
GO:0051640 organelle localization	55	0.0112665	5.699	0.074	Biological Process	GO:0051640	organelle localization	0.0112665	0.118284	0	0	55	739
GO:0008406 gonad development	21	0.0112666	2.176	0.093	Biological Process	GO:0008406	gonad development	0.0112666	0.118284	0	0	21	225
GO:0048588 developmental cell growth	21	0.0112666	2.176	0.093	Biological Process	GO:0048588	developmental cell growth	0.0112666	0.118284	0	0	21	225
GO:1903532 positive regulation of secretion by cell	25	0.0113282	2.591	0.089	Biological Process	GO:1903532	positive regulation of secretion by cell	0.0113282	0.11877	0	0	25	282
GO:0051641 cellular localization	191	0.0113786	19.793	0.063	Biological Process	GO:0051641	cellular localization	0.0113786	0.119096	0	0	191	3020
GO:0030855 epithelial cell differentiation	58	0.0113899	6.01	0.074	Biological Process	GO:0030855	epithelial cell differentiation	0.0113899	0.119096	0	0	58	787
GO:0040019 positive regulation of embryonic development	7	0.0115155	0.725	0.152	Biological Process	GO:0040019	positive regulation of embryonic development	0.0115155	0.120086	0	0	7	46
GO:0045023 G0 to G1 transition	7	0.0115155	0.725	0.152	Biological Process	GO:0045023	G0 to G1 transition	0.0115155	0.120086	0	0	7	46
GO:1901652 response to peptide	42	0.0115806	4.352	0.078	Biological Process	GO:1901652	response to peptide	0.0115806	0.120603	0	0	42	537
GO:0001841 neural tube formation	12	0.0116237	1.244	0.114	Biological Process	GO:0001841	neural tube formation	0.0116237	0.12089	0	0	12	105
GO:0000209 protein polyubiquitination	29	0.0116511	3.005	0.085	Biological Process	GO:0000209	protein polyubiquitination	0.0116511	0.121013	0	0	29	341
GO:0032880 regulation of protein localization	65	0.0116916	6.736	0.072	Biological Process	GO:0032880	regulation of protein localization	0.0116916	0.121271	0	0	65	900
GO:0015693 magnesium ion transport	4	0.0117166	0.415	0.235	Biological Process	GO:0015693	magnesium ion transport	0.0117166	0.121369	0	0	4	17
GO:0042592 homeostatic process	127	0.0117402	13.161	0.066	Biological Process	GO:0042592	homeostatic process	0.0117402	0.121451	0	0	127	1926
GO:0006367 transcription initiation from RNA polymerase II promoter	21	0.011807	2.176	0.093	Biological Process	GO:0006367	transcription initiation from RNA polymerase II promoter	0.011807	0.121602	0	0	21	226
GO:0048705 skeletal system morphogenesis	21	0.011807	2.176	0.093	Biological Process	GO:0048705	skeletal system morphogenesis	0.011807	0.121602	0	0	21	226
GO:0033135 regulation of peptidyl-serine phosphorylation	15	0.0118174	1.554	0.104	Biological Process	GO:0033135	regulation of peptidyl-serine phosphorylation	0.0118174	0.121602	0	0	15	144
GO:0046546 development of primary male sexual characteristics	15	0.0118174	1.554	0.104	Biological Process	GO:0046546	development of primary male sexual characteristics	0.0118174	0.121602	0	0	15	144
GO:0001503 ossification	33	0.0118866	3.42	0.082	Biological Process	GO:0001503	ossification	0.0118866	0.122048	0	0	33	401
GO:0021697 cerebellar cortex formation	5	0.0119236	0.518	0.192	Biological Process	GO:0021697	cerebellar cortex formation	0.0119236	0.122048	0	0	5	26
GO:0032786 positive regulation of DNA-templated transcription, elongation	5	0.0119236	0.518	0.192	Biological Process	GO:0032786	positive regulation of DNA-templated transcription, elongation	0.0119236	0.122048	0	0	5	26
GO:0071880 adenylate cyclase-activating adrenergic receptor signaling pathway	5	0.0119236	0.518	0.192	Biological Process	GO:0071880	adenylate cyclase-activating adrenergic receptor signaling pathway	0.0119236	0.122048	0	0	5	26
GO:0046620 regulation of organ growth	11	0.0120292	1.14	0.118	Biological Process	GO:0046620	regulation of organ growth	0.0120292	0.122967	0	0	11	93
GO:2000573 positive regulation of DNA biosynthetic process	9	0.0121115	0.933	0.13	Biological Process	GO:2000573	positive regulation of DNA biosynthetic process	0.0121115	0.123646	0	0	9	69
GO:0001890 placenta development	15	0.0125411	1.554	0.103	Biological Process	GO:0001890	placenta development	0.0125411	0.127863	0	0	15	145
GO:0001658 branching involved in ureteric bud morphogenesis	8	0.0127425	0.829	0.138	Biological Process	GO:0001658	branching involved in ureteric bud morphogenesis	0.0127425	0.129577	0	0	8	58
GO:0032768 regulation of monooxygenase activity	8	0.0127425	0.829	0.138	Biological Process	GO:0032768	regulation of monooxygenase activity	0.0127425	0.129577	0	0	8	58
GO:1905330 regulation of morphogenesis of an epithelium	18	0.012842	1.865	0.097	Biological Process	GO:1905330	regulation of morphogenesis of an epithelium	0.012842	0.130418	0	0	18	186
GO:0007595 lactation	7	0.0129132	0.725	0.149	Biological Process	GO:0007595	lactation	0.0129132	0.130629	0	0	7	47
GO:0050999 regulation of nitric-oxide synthase activity	7	0.0129132	0.725	0.149	Biological Process	GO:0050999	regulation of nitric-oxide synthase activity	0.0129132	0.130629	0	0	7	47
GO:0120163 negative regulation of cold-induced thermogenesis	7	0.0129132	0.725	0.149	Biological Process	GO:0120163	negative regulation of cold-induced thermogenesis	0.0129132	0.130629	0	0	7	47
GO:0046849 bone remodeling	11	0.0129758	1.14	0.117	Biological Process	GO:0046849	bone remodeling	0.0129758	0.130921	0	0	11	94
GO:0060993 kidney morphogenesis	11	0.0129758	1.14	0.117	Biological Process	GO:0060993	kidney morphogenesis	0.0129758	0.130921	0	0	11	94
GO:2000145 regulation of cell motility	68	0.0132369	7.047	0.071	Biological Process	GO:2000145	regulation of cell motility	0.0132369	0.133382	0	0	68	954
GO:0030199 collagen fibril organization	12	0.0133846	1.244	0.112	Biological Process	GO:0030199	collagen fibril organization	0.0133846	0.134695	0	0	12	107
GO:0001558 regulation of cell growth	34	0.0135662	3.523	0.081	Biological Process	GO:0001558	regulation of cell growth	0.0135662	0.136346	0	0	34	420
GO:0007517 muscle organ development	31	0.0136142	3.212	0.083	Biological Process	GO:0007517	muscle organ development	0.0136142	0.136652	0	0	31	375
GO:0048704 embryonic skeletal system morphogenesis	11	0.0139778	1.14	0.116	Biological Process	GO:0048704	embryonic skeletal system morphogenesis	0.0139778	0.139557	0	0	11	95
GO:0007263 nitric oxide mediated signal transduction	5	0.0139935	0.518	0.185	Biological Process	GO:0007263	nitric oxide mediated signal transduction	0.0139935	0.139557	0	0	5	27
GO:0010661 positive regulation of muscle cell apoptotic process	5	0.0139935	0.518	0.185	Biological Process	GO:0010661	positive regulation of muscle cell apoptotic process	0.0139935	0.139557	0	0	5	27
GO:0035886 vascular smooth muscle cell differentiation	5	0.0139935	0.518	0.185	Biological Process	GO:0035886	vascular smooth muscle cell differentiation	0.0139935	0.139557	0	0	5	27
GO:1901071 glucosamine-containing compound metabolic process	5	0.0139935	0.518	0.185	Biological Process	GO:1901071	glucosamine-containing compound metabolic process	0.0139935	0.139557	0	0	5	27
GO:0045851 pH reduction	8	0.01406	0.829	0.136	Biological Process	GO:0045851	pH reduction	0.01406	0.140041	0	0	8	59
GO:0120036 plasma membrane bounded cell projection organization	106	0.0140904	10.984	0.067	Biological Process	GO:0120036	plasma membrane bounded cell projection organization	0.0140904	0.140165	0	0	106	1584
GO:0072001 renal system development	26	0.0141176	2.694	0.086	Biological Process	GO:0072001	renal system development	0.0141176	0.140255	0	0	26	302
GO:0006629 lipid metabolic process	97	0.0141575	10.052	0.068	Biological Process	GO:0006629	lipid metabolic process	0.0141575	0.140472	0	0	97	1434
GO:0060627 regulation of vesicle-mediated transport	42	0.0141803	4.352	0.077	Biological Process	GO:0060627	regulation of vesicle-mediated transport	0.0141803	0.140519	0	0	42	544
GO:0071887 leukocyte apoptotic process	12	0.0143379	1.244	0.111	Biological Process	GO:0071887	leukocyte apoptotic process	0.0143379	0.140888	0	0	12	108
GO:0014897 striated muscle hypertrophy	10	0.0143771	1.036	0.12	Biological Process	GO:0014897	striated muscle hypertrophy	0.0143771	0.140888	0	0	10	83
GO:0005975 carbohydrate metabolic process	49	0.01441	5.078	0.075	Biological Process	GO:0005975	carbohydrate metabolic process	0.01441	0.140888	0	0	49	654
GO:0006991 response to sterol depletion	4	0.014428	0.415	0.222	Biological Process	GO:0006991	response to sterol depletion	0.014428	0.140888	0	0	4	18
GO:0010649 regulation of cell communication by electrical coupling	4	0.014428	0.415	0.222	Biological Process	GO:0010649	regulation of cell communication by electrical coupling	0.014428	0.140888	0	0	4	18
GO:0021924 cell proliferation in external granule layer	4	0.014428	0.415	0.222	Biological Process	GO:0021924	cell proliferation in external granule layer	0.014428	0.140888	0	0	4	18
GO:0021930 cerebellar granule cell precursor proliferation	4	0.014428	0.415	0.222	Biological Process	GO:0021930	cerebellar granule cell precursor proliferation	0.014428	0.140888	0	0	4	18
GO:0031952 regulation of protein autophosphorylation	7	0.0144288	0.725	0.146	Biological Process	GO:0031952	regulation of protein autophosphorylation	0.0144288	0.140888	0	0	7	48
GO:0048241 epinephrine transport	3	0.0144301	0.311	0.3	Biological Process	GO:0048241	epinephrine transport	0.0144301	0.140888	0	0	3	10
GO:0048642 negative regulation of skeletal muscle tissue development	3	0.0144301	0.311	0.3	Biological Process	GO:0048642	negative regulation of skeletal muscle tissue development	0.0144301	0.140888	0	0	3	10
GO:0060525 prostate glandular acinus development	3	0.0144301	0.311	0.3	Biological Process	GO:0060525	prostate glandular acinus development	0.0144301	0.140888	0	0	3	10
GO:0031929 TOR signaling	13	0.0144352	1.347	0.107	Biological Process	GO:0031929	TOR signaling	0.0144352	0.140888	0	0	13	121
GO:0044087 regulation of cellular component biogenesis	73	0.0146271	7.565	0.07	Biological Process	GO:0044087	regulation of cellular component biogenesis	0.0146271	0.142496	0	0	73	1040
GO:0015031 protein transport	119	0.0146367	12.332	0.066	Biological Process	GO:0015031	protein transport	0.0146367	0.142496	0	0	119	1805
GO:2001234 negative regulation of apoptotic signaling pathway	21	0.0148276	2.176	0.091	Biological Process	GO:2001234	negative regulation of apoptotic signaling pathway	0.0148276	0.144174	0	0	21	231
GO:0051234 establishment of localization	317	0.0150283	32.85	0.06	Biological Process	GO:0051234	establishment of localization	0.0150283	0.145845	0	0	317	5265
GO:0032868 response to insulin	25	0.0150369	2.591	0.087	Biological Process	GO:0032868	response to insulin	0.0150369	0.145845	0	0	25	289
GO:0030534 adult behavior	14	0.0152227	1.451	0.104	Biological Process	GO:0030534	adult behavior	0.0152227	0.147463	0	0	14	135
GO:0030030 cell projection organization	108	0.0154153	11.192	0.067	Biological Process	GO:0030030	cell projection organization	0.0154153	0.149143	0	0	108	1623
GO:0071375 cellular response to peptide hormone stimulus	28	0.0155175	2.902	0.084	Biological Process	GO:0071375	cellular response to peptide hormone stimulus	0.0155175	0.149944	0	0	28	334
GO:0001942 hair follicle development	10	0.0155511	1.036	0.119	Biological Process	GO:0001942	hair follicle development	0.0155511	0.150083	0	0	10	84
GO:0040012 regulation of locomotion	72	0.0156452	7.461	0.07	Biological Process	GO:0040012	regulation of locomotion	0.0156452	0.150804	0	0	72	1027
GO:0003161 cardiac conduction system development	6	0.0158224	0.622	0.158	Biological Process	GO:0003161	cardiac conduction system development	0.0158224	0.151459	0	0	6	38
GO:0044068 modulation by symbiont of host cellular process	6	0.0158224	0.622	0.158	Biological Process	GO:0044068	modulation by symbiont of host cellular process	0.0158224	0.151459	0	0	6	38
GO:0060338 regulation of type I interferon-mediated signaling pathway	6	0.0158224	0.622	0.158	Biological Process	GO:0060338	regulation of type I interferon-mediated signaling pathway	0.0158224	0.151459	0	0	6	38
GO:0071542 dopaminergic neuron differentiation	6	0.0158224	0.622	0.158	Biological Process	GO:0071542	dopaminergic neuron differentiation	0.0158224	0.151459	0	0	6	38
GO:0031668 cellular response to extracellular stimulus	26	0.0158389	2.694	0.085	Biological Process	GO:0031668	cellular response to extracellular stimulus	0.0158389	0.151459	0	0	26	305
GO:0009725 response to hormone	72	0.0159649	7.461	0.07	Biological Process	GO:0009725	response to hormone	0.0159649	0.151459	0	0	72	1028
GO:0022414 reproductive process	99	0.0161441	10.259	0.067	Biological Process	GO:0022414	reproductive process	0.0161441	0.151459	0	0	99	1475
GO:0055123 digestive system development	14	0.0161508	1.451	0.103	Biological Process	GO:0055123	digestive system development	0.0161508	0.151459	0	0	14	136
GO:0003018 vascular process in circulatory system	16	0.0161647	1.658	0.098	Biological Process	GO:0003018	vascular process in circulatory system	0.0161647	0.151459	0	0	16	163
GO:0031069 hair follicle morphogenesis	5	0.0162916	0.518	0.179	Biological Process	GO:0031069	hair follicle morphogenesis	0.0162916	0.151459	0	0	5	28
GO:0033598 mammary gland epithelial cell proliferation	5	0.0162916	0.518	0.179	Biological Process	GO:0033598	mammary gland epithelial cell proliferation	0.0162916	0.151459	0	0	5	28
GO:2000108 positive regulation of leukocyte apoptotic process	5	0.0162916	0.518	0.179	Biological Process	GO:2000108	positive regulation of leukocyte apoptotic process	0.0162916	0.151459	0	0	5	28
GO:0003231 cardiac ventricle development	13	0.0163728	1.347	0.106	Biological Process	GO:0003231	cardiac ventricle development	0.0163728	0.151459	0	0	13	123
GO:0006275 regulation of DNA replication	12	0.0163984	1.244	0.109	Biological Process	GO:0006275	regulation of DNA replication	0.0163984	0.151459	0	0	12	110
GO:0003137 Notch signaling pathway involved in heart induction	2	0.0164735	0.207	0.5	Biological Process	GO:0003137	Notch signaling pathway involved in heart induction	0.0164735	0.151459	0	0	2	4
GO:0006041 glucosamine metabolic process	2	0.0164735	0.207	0.5	Biological Process	GO:0006041	glucosamine metabolic process	0.0164735	0.151459	0	0	2	4
GO:0015787 UDP-glucuronic acid transmembrane transport	2	0.0164735	0.207	0.5	Biological Process	GO:0015787	UDP-glucuronic acid transmembrane transport	0.0164735	0.151459	0	0	2	4
GO:0015789 UDP-N-acetylgalactosamine transmembrane transport	2	0.0164735	0.207	0.5	Biological Process	GO:0015789	UDP-N-acetylgalactosamine transmembrane transport	0.0164735	0.151459	0	0	2	4
GO:0016560 protein import into peroxisome matrix, docking	2	0.0164735	0.207	0.5	Biological Process	GO:0016560	protein import into peroxisome matrix, docking	0.0164735	0.151459	0	0	2	4
GO:0019086 late viral transcription	2	0.0164735	0.207	0.5	Biological Process	GO:0019086	late viral transcription	0.0164735	0.151459	0	0	2	4
GO:0021824 cerebral cortex tangential migration using cell-axon interactions	2	0.0164735	0.207	0.5	Biological Process	GO:0021824	cerebral cortex tangential migration using cell-axon interactions	0.0164735	0.151459	0	0	2	4
GO:0021828 gonadotrophin-releasing hormone neuronal migration to the hypothalamus	2	0.0164735	0.207	0.5	Biological Process	GO:0021828	gonadotrophin-releasing hormone neuronal migration to the hypothalamus	0.0164735	0.151459	0	0	2	4
GO:0021856 hypothalamic tangential migration using cell-axon interactions	2	0.0164735	0.207	0.5	Biological Process	GO:0021856	hypothalamic tangential migration using cell-axon interactions	0.0164735	0.151459	0	0	2	4
GO:0035480 regulation of Notch signaling pathway involved in heart induction	2	0.0164735	0.207	0.5	Biological Process	GO:0035480	regulation of Notch signaling pathway involved in heart induction	0.0164735	0.151459	0	0	2	4
GO:0035481 positive regulation of Notch signaling pathway involved in heart induction	2	0.0164735	0.207	0.5	Biological Process	GO:0035481	positive regulation of Notch signaling pathway involved in heart induction	0.0164735	0.151459	0	0	2	4
GO:0035910 ascending aorta morphogenesis	2	0.0164735	0.207	0.5	Biological Process	GO:0035910	ascending aorta morphogenesis	0.0164735	0.151459	0	0	2	4
GO:0036438 maintenance of lens transparency	2	0.0164735	0.207	0.5	Biological Process	GO:0036438	maintenance of lens transparency	0.0164735	0.151459	0	0	2	4
GO:0044413 avoidance of host defenses	2	0.0164735	0.207	0.5	Biological Process	GO:0044413	avoidance of host defenses	0.0164735	0.151459	0	0	2	4
GO:0046016 positive regulation of transcription by glucose	2	0.0164735	0.207	0.5	Biological Process	GO:0046016	positive regulation of transcription by glucose	0.0164735	0.151459	0	0	2	4
GO:0051832 avoidance of defenses of other organism involved in symbiotic interaction	2	0.0164735	0.207	0.5	Biological Process	GO:0051832	avoidance of defenses of other organism involved in symbiotic interaction	0.0164735	0.151459	0	0	2	4
GO:0060574 intestinal epithelial cell maturation	2	0.0164735	0.207	0.5	Biological Process	GO:0060574	intestinal epithelial cell maturation	0.0164735	0.151459	0	0	2	4
GO:0060681 branch elongation involved in ureteric bud branching	2	0.0164735	0.207	0.5	Biological Process	GO:0060681	branch elongation involved in ureteric bud branching	0.0164735	0.151459	0	0	2	4
GO:0060800 regulation of cell differentiation involved in embryonic placenta development	2	0.0164735	0.207	0.5	Biological Process	GO:0060800	regulation of cell differentiation involved in embryonic placenta development	0.0164735	0.151459	0	0	2	4
GO:0060913 cardiac cell fate determination	2	0.0164735	0.207	0.5	Biological Process	GO:0060913	cardiac cell fate determination	0.0164735	0.151459	0	0	2	4
GO:0061055 myotome development	2	0.0164735	0.207	0.5	Biological Process	GO:0061055	myotome development	0.0164735	0.151459	0	0	2	4
GO:0071878 negative regulation of adenylate cyclase-activating adrenergic receptor signaling pathway	2	0.0164735	0.207	0.5	Biological Process	GO:0071878	negative regulation of adenylate cyclase-activating adrenergic receptor signaling pathway	0.0164735	0.151459	0	0	2	4
GO:0072108 positive regulation of mesenchymal to epithelial transition involved in metanephros morphogenesis	2	0.0164735	0.207	0.5	Biological Process	GO:0072108	positive regulation of mesenchymal to epithelial transition involved in metanephros morphogenesis	0.0164735	0.151459	0	0	2	4
GO:0097476 spinal cord motor neuron migration	2	0.0164735	0.207	0.5	Biological Process	GO:0097476	spinal cord motor neuron migration	0.0164735	0.151459	0	0	2	4
GO:1902725 negative regulation of satellite cell differentiation	2	0.0164735	0.207	0.5	Biological Process	GO:1902725	negative regulation of satellite cell differentiation	0.0164735	0.151459	0	0	2	4
GO:0014896 muscle hypertrophy	10	0.016795	1.036	0.118	Biological Process	GO:0014896	muscle hypertrophy	0.016795	0.154232	0	0	10	85
GO:0000003 reproduction	99	0.0169802	10.259	0.067	Biological Process	GO:0000003	reproduction	0.0169802	0.155635	0	0	99	1478
GO:0030520 intracellular estrogen receptor signaling pathway	8	0.0169878	0.829	0.131	Biological Process	GO:0030520	intracellular estrogen receptor signaling pathway	0.0169878	0.155635	0	0	8	61
GO:0070085 glycosylation	23	0.0170283	2.383	0.087	Biological Process	GO:0070085	glycosylation	0.0170283	0.155759	0	0	23	263
GO:0003205 cardiac chamber development	16	0.0170414	1.658	0.098	Biological Process	GO:0003205	cardiac chamber development	0.0170414	0.155759	0	0	16	164
GO:0051648 vesicle localization	27	0.0172018	2.798	0.084	Biological Process	GO:0051648	vesicle localization	0.0172018	0.15704	0	0	27	322
GO:1903034 regulation of response to wounding	18	0.0172946	1.865	0.094	Biological Process	GO:1903034	regulation of response to wounding	0.0172946	0.157702	0	0	18	192
GO:0046928 regulation of neurotransmitter secretion	11	0.0173357	1.14	0.112	Biological Process	GO:0046928	regulation of neurotransmitter secretion	0.0173357	0.157891	0	0	11	98
GO:0003007 heart morphogenesis	22	0.0173655	2.28	0.088	Biological Process	GO:0003007	heart morphogenesis	0.0173655	0.157978	0	0	22	249
GO:0044255 cellular lipid metabolic process	76	0.0174429	7.876	0.069	Biological Process	GO:0044255	cellular lipid metabolic process	0.0174429	0.158321	0	0	76	1098
GO:0021534 cell proliferation in hindbrain	4	0.0175051	0.415	0.211	Biological Process	GO:0021534	cell proliferation in hindbrain	0.0175051	0.158321	0	0	4	19
GO:0060339 negative regulation of type I interferon-mediated signaling pathway	4	0.0175051	0.415	0.211	Biological Process	GO:0060339	negative regulation of type I interferon-mediated signaling pathway	0.0175051	0.158321	0	0	4	19
GO:0061042 vascular wound healing	4	0.0175051	0.415	0.211	Biological Process	GO:0061042	vascular wound healing	0.0175051	0.158321	0	0	4	19
GO:0072074 kidney mesenchyme development	4	0.0175051	0.415	0.211	Biological Process	GO:0072074	kidney mesenchyme development	0.0175051	0.158321	0	0	4	19
GO:0016331 morphogenesis of embryonic epithelium	15	0.0176354	1.554	0.099	Biological Process	GO:0016331	morphogenesis of embryonic epithelium	0.0176354	0.159313	0	0	15	151
GO:0051650 establishment of vesicle localization	26	0.0177232	2.694	0.084	Biological Process	GO:0051650	establishment of vesicle localization	0.0177232	0.159921	0	0	26	308
GO:1902042 negative regulation of extrinsic apoptotic signaling pathway via death domain receptors	6	0.0178637	0.622	0.154	Biological Process	GO:1902042	negative regulation of extrinsic apoptotic signaling pathway via death domain receptors	0.0178637	0.160962	0	0	6	39
GO:0046907 intracellular transport	120	0.0178801	12.435	0.065	Biological Process	GO:0046907	intracellular transport	0.0178801	0.160962	0	0	120	1835
GO:0051656 establishment of organelle localization	41	0.0180111	4.249	0.076	Biological Process	GO:0051656	establishment of organelle localization	0.0180111	0.161954	0	0	41	537
GO:0050679 positive regulation of epithelial cell proliferation	18	0.0181408	1.865	0.093	Biological Process	GO:0050679	positive regulation of epithelial cell proliferation	0.0181408	0.162931	0	0	18	193
GO:2001233 regulation of apoptotic signaling pathway	32	0.0183448	3.316	0.08	Biological Process	GO:2001233	regulation of apoptotic signaling pathway	0.0183448	0.164573	0	0	32	399
GO:0032006 regulation of TOR signaling	11	0.0185786	1.14	0.111	Biological Process	GO:0032006	regulation of TOR signaling	0.0185786	0.166287	0	0	11	99
GO:0042472 inner ear morphogenesis	11	0.0185786	1.14	0.111	Biological Process	GO:0042472	inner ear morphogenesis	0.0185786	0.166287	0	0	11	99
GO:0035924 cellular response to vascular endothelial growth factor stimulus	8	0.0186055	0.829	0.129	Biological Process	GO:0035924	cellular response to vascular endothelial growth factor stimulus	0.0186055	0.166336	0	0	8	62
GO:0045446 endothelial cell differentiation	12	0.0186747	1.244	0.107	Biological Process	GO:0045446	endothelial cell differentiation	0.0186747	0.166763	0	0	12	112
GO:0003209 cardiac atrium morphogenesis	5	0.0188275	0.518	0.172	Biological Process	GO:0003209	cardiac atrium morphogenesis	0.0188275	0.167358	0	0	5	29
GO:0030194 positive regulation of blood coagulation	5	0.0188275	0.518	0.172	Biological Process	GO:0030194	positive regulation of blood coagulation	0.0188275	0.167358	0	0	5	29
GO:1900048 positive regulation of hemostasis	5	0.0188275	0.518	0.172	Biological Process	GO:1900048	positive regulation of hemostasis	0.0188275	0.167358	0	0	5	29
GO:1904357 negative regulation of telomere maintenance via telomere lengthening	5	0.0188275	0.518	0.172	Biological Process	GO:1904357	negative regulation of telomere maintenance via telomere lengthening	0.0188275	0.167358	0	0	5	29
GO:0003157 endocardium development	3	0.0190506	0.311	0.273	Biological Process	GO:0003157	endocardium development	0.0190506	0.167426	0	0	3	11
GO:0006048 UDP-N-acetylglucosamine biosynthetic process	3	0.0190506	0.311	0.273	Biological Process	GO:0006048	UDP-N-acetylglucosamine biosynthetic process	0.0190506	0.167426	0	0	3	11
GO:0021892 cerebral cortex GABAergic interneuron differentiation	3	0.0190506	0.311	0.273	Biological Process	GO:0021892	cerebral cortex GABAergic interneuron differentiation	0.0190506	0.167426	0	0	3	11
GO:0032525 somite rostral/caudal axis specification	3	0.0190506	0.311	0.273	Biological Process	GO:0032525	somite rostral/caudal axis specification	0.0190506	0.167426	0	0	3	11
GO:0033625 positive regulation of integrin activation	3	0.0190506	0.311	0.273	Biological Process	GO:0033625	positive regulation of integrin activation	0.0190506	0.167426	0	0	3	11
GO:0033690 positive regulation of osteoblast proliferation	3	0.0190506	0.311	0.273	Biological Process	GO:0033690	positive regulation of osteoblast proliferation	0.0190506	0.167426	0	0	3	11
GO:0045628 regulation of T-helper 2 cell differentiation	3	0.0190506	0.311	0.273	Biological Process	GO:0045628	regulation of T-helper 2 cell differentiation	0.0190506	0.167426	0	0	3	11
GO:0048340 paraxial mesoderm morphogenesis	3	0.0190506	0.311	0.273	Biological Process	GO:0048340	paraxial mesoderm morphogenesis	0.0190506	0.167426	0	0	3	11
GO:0086103 G protein-coupled receptor signaling pathway involved in heart process	3	0.0190506	0.311	0.273	Biological Process	GO:0086103	G protein-coupled receptor signaling pathway involved in heart process	0.0190506	0.167426	0	0	3	11
GO:0097709 connective tissue replacement	3	0.0190506	0.311	0.273	Biological Process	GO:0097709	connective tissue replacement	0.0190506	0.167426	0	0	3	11
GO:0030111 regulation of Wnt signaling pathway	30	0.0191376	3.109	0.081	Biological Process	GO:0030111	regulation of Wnt signaling pathway	0.0191376	0.168	0	0	30	370
GO:0050896 response to stimulus	537	0.0192721	55.648	0.058	Biological Process	GO:0050896	response to stimulus	0.0192721	0.16899	0	0	537	9291
GO:0030198 extracellular matrix organization	33	0.019397	3.42	0.079	Biological Process	GO:0030198	extracellular matrix organization	0.019397	0.169893	0	0	33	416
GO:0007548 sex differentiation	24	0.0194643	2.487	0.085	Biological Process	GO:0007548	sex differentiation	0.0194643	0.170038	0	0	24	281
GO:0001656 metanephros development	10	0.0195011	1.036	0.115	Biological Process	GO:0001656	metanephros development	0.0195011	0.170038	0	0	10	87
GO:0022404 molting cycle process	10	0.0195011	1.036	0.115	Biological Process	GO:0022404	molting cycle process	0.0195011	0.170038	0	0	10	87
GO:0022405 hair cycle process	10	0.0195011	1.036	0.115	Biological Process	GO:0022405	hair cycle process	0.0195011	0.170038	0	0	10	87
GO:0061614 pri-miRNA transcription by RNA polymerase II	7	0.0197308	0.725	0.137	Biological Process	GO:0061614	pri-miRNA transcription by RNA polymerase II	0.0197308	0.171848	0	0	7	51
GO:0099003 vesicle-mediated transport in synapse	19	0.0197737	1.969	0.091	Biological Process	GO:0099003	vesicle-mediated transport in synapse	0.0197737	0.172029	0	0	19	209
GO:1901575 organic substance catabolic process	146	0.0197977	15.13	0.064	Biological Process	GO:1901575	organic substance catabolic process	0.0197977	0.172045	0	0	146	2286
GO:0050731 positive regulation of peptidyl-tyrosine phosphorylation	18	0.0199287	1.865	0.092	Biological Process	GO:0050731	positive regulation of peptidyl-tyrosine phosphorylation	0.0199287	0.17299	0	0	18	195
GO:0071354 cellular response to interleukin-6	6	0.0200783	0.622	0.15	Biological Process	GO:0071354	cellular response to interleukin-6	0.0200783	0.173751	0	0	6	40
GO:1902895 positive regulation of pri-miRNA transcription by RNA polymerase II	6	0.0200783	0.622	0.15	Biological Process	GO:1902895	positive regulation of pri-miRNA transcription by RNA polymerase II	0.0200783	0.173751	0	0	6	40
GO:0007004 telomere maintenance via telomerase	9	0.0201506	0.933	0.12	Biological Process	GO:0007004	telomere maintenance via telomerase	0.0201506	0.173751	0	0	9	75
GO:0070227 lymphocyte apoptotic process	9	0.0201506	0.933	0.12	Biological Process	GO:0070227	lymphocyte apoptotic process	0.0201506	0.173751	0	0	9	75
GO:0072088 nephron epithelium morphogenesis	9	0.0201506	0.933	0.12	Biological Process	GO:0072088	nephron epithelium morphogenesis	0.0201506	0.173751	0	0	9	75
GO:1900076 regulation of cellular response to insulin stimulus	9	0.0201506	0.933	0.12	Biological Process	GO:1900076	regulation of cellular response to insulin stimulus	0.0201506	0.173751	0	0	9	75
GO:0097191 extrinsic apoptotic signaling pathway	20	0.0203943	2.073	0.089	Biological Process	GO:0097191	extrinsic apoptotic signaling pathway	0.0203943	0.175658	0	0	20	224
GO:0061448 connective tissue development	22	0.0204539	2.28	0.087	Biological Process	GO:0061448	connective tissue development	0.0204539	0.175976	0	0	22	253
GO:0030856 regulation of epithelial cell differentiation	15	0.0207122	1.554	0.097	Biological Process	GO:0030856	regulation of epithelial cell differentiation	0.0207122	0.178001	0	0	15	154
GO:0006044 N-acetylglucosamine metabolic process	4	0.0209612	0.415	0.2	Biological Process	GO:0006044	N-acetylglucosamine metabolic process	0.0209612	0.17901	0	0	4	20
GO:0060039 pericardium development	4	0.0209612	0.415	0.2	Biological Process	GO:0060039	pericardium development	0.0209612	0.17901	0	0	4	20
GO:1905276 regulation of epithelial tube formation	4	0.0209612	0.415	0.2	Biological Process	GO:1905276	regulation of epithelial tube formation	0.0209612	0.17901	0	0	4	20
GO:2000773 negative regulation of cellular senescence	4	0.0209612	0.415	0.2	Biological Process	GO:2000773	negative regulation of cellular senescence	0.0209612	0.17901	0	0	4	20
GO:2001014 regulation of skeletal muscle cell differentiation	4	0.0209612	0.415	0.2	Biological Process	GO:2001014	regulation of skeletal muscle cell differentiation	0.0209612	0.17901	0	0	4	20
GO:0048013 ephrin receptor signaling pathway	10	0.0209678	1.036	0.114	Biological Process	GO:0048013	ephrin receptor signaling pathway	0.0209678	0.17901	0	0	10	88
GO:0006793 phosphorus metabolic process	212	0.0213958	21.969	0.062	Biological Process	GO:0006793	phosphorus metabolic process	0.0213958	0.182463	0	0	212	3439
GO:0048584 positive regulation of response to stimulus	158	0.0214896	16.373	0.063	Biological Process	GO:0048584	positive regulation of response to stimulus	0.0214896	0.183063	0	0	158	2499
GO:0007176 regulation of epidermal growth factor-activated receptor activity	5	0.0216097	0.518	0.167	Biological Process	GO:0007176	regulation of epidermal growth factor-activated receptor activity	0.0216097	0.183281	0	0	5	30
GO:0045737 positive regulation of cyclin-dependent protein serine/threonine kinase activity	5	0.0216097	0.518	0.167	Biological Process	GO:0045737	positive regulation of cyclin-dependent protein serine/threonine kinase activity	0.0216097	0.183281	0	0	5	30
GO:0050820 positive regulation of coagulation	5	0.0216097	0.518	0.167	Biological Process	GO:0050820	positive regulation of coagulation	0.0216097	0.183281	0	0	5	30
GO:0061311 cell surface receptor signaling pathway involved in heart development	5	0.0216097	0.518	0.167	Biological Process	GO:0061311	cell surface receptor signaling pathway involved in heart development	0.0216097	0.183281	0	0	5	30
GO:0022604 regulation of cell morphogenesis	38	0.0217126	3.938	0.076	Biological Process	GO:0022604	regulation of cell morphogenesis	0.0217126	0.183954	0	0	38	497
GO:0090066 regulation of anatomical structure size	39	0.0219535	4.041	0.076	Biological Process	GO:0090066	regulation of anatomical structure size	0.0219535	0.185792	0	0	39	513
GO:0060675 ureteric bud morphogenesis	8	0.0221658	0.829	0.125	Biological Process	GO:0060675	ureteric bud morphogenesis	0.0221658	0.187384	0	0	8	64
GO:0007257 activation of JUN kinase activity	6	0.0224722	0.622	0.146	Biological Process	GO:0007257	activation of JUN kinase activity	0.0224722	0.189768	0	0	6	41
GO:0043200 response to amino acid	12	0.0225212	1.244	0.104	Biological Process	GO:0043200	response to amino acid	0.0225212	0.189975	0	0	12	115
GO:0008286 insulin receptor signaling pathway	14	0.0226568	1.451	0.099	Biological Process	GO:0008286	insulin receptor signaling pathway	0.0226568	0.190912	0	0	14	142
GO:0006493 protein O-linked glycosylation	11	0.0227038	1.14	0.108	Biological Process	GO:0006493	protein O-linked glycosylation	0.0227038	0.191101	0	0	11	102
GO:0031346 positive regulation of cell projection organization	31	0.0230693	3.212	0.079	Biological Process	GO:0031346	positive regulation of cell projection organization	0.0230693	0.193967	0	0	31	391
GO:0044057 regulation of system process	44	0.0233354	4.56	0.074	Biological Process	GO:0044057	regulation of system process	0.0233354	0.195992	0	0	44	594
GO:0031589 cell-substrate adhesion	29	0.0234132	3.005	0.08	Biological Process	GO:0031589	cell-substrate adhesion	0.0234132	0.196433	0	0	29	361
GO:0006278 RNA-dependent DNA biosynthetic process	9	0.0235312	0.933	0.117	Biological Process	GO:0006278	RNA-dependent DNA biosynthetic process	0.0235312	0.196998	0	0	9	77
GO:0072028 nephron morphogenesis	9	0.0235312	0.933	0.117	Biological Process	GO:0072028	nephron morphogenesis	0.0235312	0.196998	0	0	9	77
GO:0071229 cellular response to acid chemical	19	0.023572	1.969	0.089	Biological Process	GO:0071229	cellular response to acid chemical	0.023572	0.197127	0	0	19	213
GO:0045787 positive regulation of cell cycle	31	0.0237986	3.212	0.079	Biological Process	GO:0045787	positive regulation of cell cycle	0.0237986	0.198807	0	0	31	392
GO:0002066 columnar/cuboidal epithelial cell development	8	0.0241151	0.829	0.123	Biological Process	GO:0002066	columnar/cuboidal epithelial cell development	0.0241151	0.198811	0	0	8	65
GO:0007585 respiratory gaseous exchange	8	0.0241151	0.829	0.123	Biological Process	GO:0007585	respiratory gaseous exchange	0.0241151	0.198811	0	0	8	65
GO:0048844 artery morphogenesis	8	0.0241151	0.829	0.123	Biological Process	GO:0048844	artery morphogenesis	0.0241151	0.198811	0	0	8	65
GO:0072171 mesonephric tubule morphogenesis	8	0.0241151	0.829	0.123	Biological Process	GO:0072171	mesonephric tubule morphogenesis	0.0241151	0.198811	0	0	8	65
GO:0001776 leukocyte homeostasis	10	0.0241396	1.036	0.111	Biological Process	GO:0001776	leukocyte homeostasis	0.0241396	0.198811	0	0	10	90
GO:0045778 positive regulation of ossification	10	0.0241396	1.036	0.111	Biological Process	GO:0045778	positive regulation of ossification	0.0241396	0.198811	0	0	10	90
GO:0010469 regulation of signaling receptor activity	17	0.0241405	1.762	0.092	Biological Process	GO:0010469	regulation of signaling receptor activity	0.0241405	0.198811	0	0	17	185
GO:0002262 myeloid cell homeostasis	15	0.024179	1.554	0.096	Biological Process	GO:0002262	myeloid cell homeostasis	0.024179	0.198811	0	0	15	157
GO:0002327 immature B cell differentiation	3	0.0243915	0.311	0.25	Biological Process	GO:0002327	immature B cell differentiation	0.0243915	0.198811	0	0	3	12
GO:0006002 fructose 6-phosphate metabolic process	3	0.0243915	0.311	0.25	Biological Process	GO:0006002	fructose 6-phosphate metabolic process	0.0243915	0.198811	0	0	3	12
GO:0021702 cerebellar Purkinje cell differentiation	3	0.0243915	0.311	0.25	Biological Process	GO:0021702	cerebellar Purkinje cell differentiation	0.0243915	0.198811	0	0	3	12
GO:0021860 pyramidal neuron development	3	0.0243915	0.311	0.25	Biological Process	GO:0021860	pyramidal neuron development	0.0243915	0.198811	0	0	3	12
GO:0044531 modulation of programmed cell death in other organism	3	0.0243915	0.311	0.25	Biological Process	GO:0044531	modulation of programmed cell death in other organism	0.0243915	0.198811	0	0	3	12
GO:0045955 negative regulation of calcium ion-dependent exocytosis	3	0.0243915	0.311	0.25	Biological Process	GO:0045955	negative regulation of calcium ion-dependent exocytosis	0.0243915	0.198811	0	0	3	12
GO:0052040 modulation by symbiont of host programmed cell death	3	0.0243915	0.311	0.25	Biological Process	GO:0052040	modulation by symbiont of host programmed cell death	0.0243915	0.198811	0	0	3	12
GO:0052248 modulation of programmed cell death in other organism involved in symbiotic interaction	3	0.0243915	0.311	0.25	Biological Process	GO:0052248	modulation of programmed cell death in other organism involved in symbiotic interaction	0.0243915	0.198811	0	0	3	12
GO:0070816 phosphorylation of RNA polymerase II C-terminal domain	3	0.0243915	0.311	0.25	Biological Process	GO:0070816	phosphorylation of RNA polymerase II C-terminal domain	0.0243915	0.198811	0	0	3	12
GO:1901844 regulation of cell communication by electrical coupling involved in cardiac conduction	3	0.0243915	0.311	0.25	Biological Process	GO:1901844	regulation of cell communication by electrical coupling involved in cardiac conduction	0.0243915	0.198811	0	0	3	12
GO:1902337 regulation of apoptotic process involved in morphogenesis	3	0.0243915	0.311	0.25	Biological Process	GO:1902337	regulation of apoptotic process involved in morphogenesis	0.0243915	0.198811	0	0	3	12
GO:1904748 regulation of apoptotic process involved in development	3	0.0243915	0.311	0.25	Biological Process	GO:1904748	regulation of apoptotic process involved in development	0.0243915	0.198811	0	0	3	12
GO:1905941 positive regulation of gonad development	3	0.0243915	0.311	0.25	Biological Process	GO:1905941	positive regulation of gonad development	0.0243915	0.198811	0	0	3	12
GO:2000543 positive regulation of gastrulation	3	0.0243915	0.311	0.25	Biological Process	GO:2000543	positive regulation of gastrulation	0.0243915	0.198811	0	0	3	12
GO:2000650 negative regulation of sodium ion transmembrane transporter activity	3	0.0243915	0.311	0.25	Biological Process	GO:2000650	negative regulation of sodium ion transmembrane transporter activity	0.0243915	0.198811	0	0	3	12
GO:0032147 activation of protein kinase activity	27	0.0244132	2.798	0.081	Biological Process	GO:0032147	activation of protein kinase activity	0.0244132	0.198811	0	0	27	332
GO:0048333 mesodermal cell differentiation	5	0.0246459	0.518	0.161	Biological Process	GO:0048333	mesodermal cell differentiation	0.0246459	0.199712	0	0	5	31
GO:0060795 cell fate commitment involved in formation of primary germ layer	5	0.0246459	0.518	0.161	Biological Process	GO:0060795	cell fate commitment involved in formation of primary germ layer	0.0246459	0.199712	0	0	5	31
GO:0045862 positive regulation of proteolysis	30	0.0247762	3.109	0.079	Biological Process	GO:0045862	positive regulation of proteolysis	0.0247762	0.199712	0	0	30	378
GO:0006925 inflammatory cell apoptotic process	4	0.0248066	0.415	0.19	Biological Process	GO:0006925	inflammatory cell apoptotic process	0.0248066	0.199712	0	0	4	21
GO:0007398 ectoderm development	4	0.0248066	0.415	0.19	Biological Process	GO:0007398	ectoderm development	0.0248066	0.199712	0	0	4	21
GO:0007413 axonal fasciculation	4	0.0248066	0.415	0.19	Biological Process	GO:0007413	axonal fasciculation	0.0248066	0.199712	0	0	4	21
GO:0032211 negative regulation of telomere maintenance via telomerase	4	0.0248066	0.415	0.19	Biological Process	GO:0032211	negative regulation of telomere maintenance via telomerase	0.0248066	0.199712	0	0	4	21
GO:0060445 branching involved in salivary gland morphogenesis	4	0.0248066	0.415	0.19	Biological Process	GO:0060445	branching involved in salivary gland morphogenesis	0.0248066	0.199712	0	0	4	21
GO:0060713 labyrinthine layer morphogenesis	4	0.0248066	0.415	0.19	Biological Process	GO:0060713	labyrinthine layer morphogenesis	0.0248066	0.199712	0	0	4	21
GO:0072215 regulation of metanephros development	4	0.0248066	0.415	0.19	Biological Process	GO:0072215	regulation of metanephros development	0.0248066	0.199712	0	0	4	21
GO:0106030 neuron projection fasciculation	4	0.0248066	0.415	0.19	Biological Process	GO:0106030	neuron projection fasciculation	0.0248066	0.199712	0	0	4	21
GO:0061136 regulation of proteasomal protein catabolic process	18	0.0249908	1.865	0.09	Biological Process	GO:0061136	regulation of proteasomal protein catabolic process	0.0249908	0.200987	0	0	18	200
GO:0021587 cerebellum morphogenesis	6	0.0250509	0.622	0.143	Biological Process	GO:0021587	cerebellum morphogenesis	0.0250509	0.201262	0	0	6	42
GO:1904951 positive regulation of establishment of protein localization	28	0.0251323	2.902	0.08	Biological Process	GO:1904951	positive regulation of establishment of protein localization	0.0251323	0.201707	0	0	28	348
GO:0051301 cell division	46	0.0252532	4.767	0.073	Biological Process	GO:0051301	cell division	0.0252532	0.202284	0	0	46	629
GO:0010976 positive regulation of neuron projection development	24	0.0252562	2.487	0.083	Biological Process	GO:0010976	positive regulation of neuron projection development	0.0252562	0.202284	0	0	24	288
GO:0060341 regulation of cellular localization	66	0.0252952	6.839	0.069	Biological Process	GO:0060341	regulation of cellular localization	0.0252952	0.202388	0	0	66	953
GO:0055080 cation homeostasis	53	0.0256505	5.492	0.071	Biological Process	GO:0055080	cation homeostasis	0.0256505	0.203622	0	0	53	742
GO:0042176 regulation of protein catabolic process	32	0.0257918	3.316	0.078	Biological Process	GO:0042176	regulation of protein catabolic process	0.0257918	0.203622	0	0	32	410
GO:0032963 collagen metabolic process	11	0.0258026	1.14	0.106	Biological Process	GO:0032963	collagen metabolic process	0.0258026	0.203622	0	0	11	104
GO:0051341 regulation of oxidoreductase activity	11	0.0258026	1.14	0.106	Biological Process	GO:0051341	regulation of oxidoreductase activity	0.0258026	0.203622	0	0	11	104
GO:1901888 regulation of cell junction assembly	11	0.0258026	1.14	0.106	Biological Process	GO:1901888	regulation of cell junction assembly	0.0258026	0.203622	0	0	11	104
GO:0043967 histone H4 acetylation	8	0.0261814	0.829	0.121	Biological Process	GO:0043967	histone H4 acetylation	0.0261814	0.203622	0	0	8	66
GO:0010611 regulation of cardiac muscle hypertrophy	7	0.0262608	0.725	0.13	Biological Process	GO:0010611	regulation of cardiac muscle hypertrophy	0.0262608	0.203622	0	0	7	54
GO:0032210 regulation of telomere maintenance via telomerase	7	0.0262608	0.725	0.13	Biological Process	GO:0032210	regulation of telomere maintenance via telomerase	0.0262608	0.203622	0	0	7	54
GO:0035904 aorta development	7	0.0262608	0.725	0.13	Biological Process	GO:0035904	aorta development	0.0262608	0.203622	0	0	7	54
GO:0003278 apoptotic process involved in heart morphogenesis	2	0.0264716	0.207	0.4	Biological Process	GO:0003278	apoptotic process involved in heart morphogenesis	0.0264716	0.203622	0	0	2	5
GO:0006537 glutamate biosynthetic process	2	0.0264716	0.207	0.4	Biological Process	GO:0006537	glutamate biosynthetic process	0.0264716	0.203622	0	0	2	5
GO:0008582 regulation of synaptic growth at neuromuscular junction	2	0.0264716	0.207	0.4	Biological Process	GO:0008582	regulation of synaptic growth at neuromuscular junction	0.0264716	0.203622	0	0	2	5
GO:0010040 response to iron(II) ion	2	0.0264716	0.207	0.4	Biological Process	GO:0010040	response to iron(II) ion	0.0264716	0.203622	0	0	2	5
GO:0010641 positive regulation of platelet-derived growth factor receptor signaling pathway	2	0.0264716	0.207	0.4	Biological Process	GO:0010641	positive regulation of platelet-derived growth factor receptor signaling pathway	0.0264716	0.203622	0	0	2	5
GO:0010706 ganglioside biosynthetic process via lactosylceramide	2	0.0264716	0.207	0.4	Biological Process	GO:0010706	ganglioside biosynthetic process via lactosylceramide	0.0264716	0.203622	0	0	2	5
GO:0014834 skeletal muscle satellite cell maintenance involved in skeletal muscle regeneration	2	0.0264716	0.207	0.4	Biological Process	GO:0014834	skeletal muscle satellite cell maintenance involved in skeletal muscle regeneration	0.0264716	0.203622	0	0	2	5
GO:0021855 hypothalamus cell migration	2	0.0264716	0.207	0.4	Biological Process	GO:0021855	hypothalamus cell migration	0.0264716	0.203622	0	0	2	5
GO:0032762 mast cell cytokine production	2	0.0264716	0.207	0.4	Biological Process	GO:0032762	mast cell cytokine production	0.0264716	0.203622	0	0	2	5
GO:0032763 regulation of mast cell cytokine production	2	0.0264716	0.207	0.4	Biological Process	GO:0032763	regulation of mast cell cytokine production	0.0264716	0.203622	0	0	2	5
GO:0033088 negative regulation of immature T cell proliferation in thymus	2	0.0264716	0.207	0.4	Biological Process	GO:0033088	negative regulation of immature T cell proliferation in thymus	0.0264716	0.203622	0	0	2	5
GO:0034721 histone H3-K4 demethylation, trimethyl-H3-K4-specific	2	0.0264716	0.207	0.4	Biological Process	GO:0034721	histone H3-K4 demethylation, trimethyl-H3-K4-specific	0.0264716	0.203622	0	0	2	5
GO:0035332 positive regulation of hippo signaling	2	0.0264716	0.207	0.4	Biological Process	GO:0035332	positive regulation of hippo signaling	0.0264716	0.203622	0	0	2	5
GO:0035905 ascending aorta development	2	0.0264716	0.207	0.4	Biological Process	GO:0035905	ascending aorta development	0.0264716	0.203622	0	0	2	5
GO:0046015 regulation of transcription by glucose	2	0.0264716	0.207	0.4	Biological Process	GO:0046015	regulation of transcription by glucose	0.0264716	0.203622	0	0	2	5
GO:0046478 lactosylceramide metabolic process	2	0.0264716	0.207	0.4	Biological Process	GO:0046478	lactosylceramide metabolic process	0.0264716	0.203622	0	0	2	5
GO:0060029 convergent extension involved in organogenesis	2	0.0264716	0.207	0.4	Biological Process	GO:0060029	convergent extension involved in organogenesis	0.0264716	0.203622	0	0	2	5
GO:0060066 oviduct development	2	0.0264716	0.207	0.4	Biological Process	GO:0060066	oviduct development	0.0264716	0.203622	0	0	2	5
GO:0060385 axonogenesis involved in innervation	2	0.0264716	0.207	0.4	Biological Process	GO:0060385	axonogenesis involved in innervation	0.0264716	0.203622	0	0	2	5
GO:0060406 positive regulation of penile erection	2	0.0264716	0.207	0.4	Biological Process	GO:0060406	positive regulation of penile erection	0.0264716	0.203622	0	0	2	5
GO:0060501 positive regulation of epithelial cell proliferation involved in lung morphogenesis	2	0.0264716	0.207	0.4	Biological Process	GO:0060501	positive regulation of epithelial cell proliferation involved in lung morphogenesis	0.0264716	0.203622	0	0	2	5
GO:0061197 fungiform papilla morphogenesis	2	0.0264716	0.207	0.4	Biological Process	GO:0061197	fungiform papilla morphogenesis	0.0264716	0.203622	0	0	2	5
GO:0070662 mast cell proliferation	2	0.0264716	0.207	0.4	Biological Process	GO:0070662	mast cell proliferation	0.0264716	0.203622	0	0	2	5
GO:0106015 negative regulation of inflammatory response to wounding	2	0.0264716	0.207	0.4	Biological Process	GO:0106015	negative regulation of inflammatory response to wounding	0.0264716	0.203622	0	0	2	5
GO:1901490 regulation of lymphangiogenesis	2	0.0264716	0.207	0.4	Biological Process	GO:1901490	regulation of lymphangiogenesis	0.0264716	0.203622	0	0	2	5
GO:1901842 negative regulation of high voltage-gated calcium channel activity	2	0.0264716	0.207	0.4	Biological Process	GO:1901842	negative regulation of high voltage-gated calcium channel activity	0.0264716	0.203622	0	0	2	5
GO:1904220 regulation of serine C-palmitoyltransferase activity	2	0.0264716	0.207	0.4	Biological Process	GO:1904220	regulation of serine C-palmitoyltransferase activity	0.0264716	0.203622	0	0	2	5
GO:1905007 positive regulation of epithelial to mesenchymal transition involved in endocardial cushion formation	2	0.0264716	0.207	0.4	Biological Process	GO:1905007	positive regulation of epithelial to mesenchymal transition involved in endocardial cushion formation	0.0264716	0.203622	0	0	2	5
GO:1905870 positive regulation of 3'-UTR-mediated mRNA stabilization	2	0.0264716	0.207	0.4	Biological Process	GO:1905870	positive regulation of 3'-UTR-mediated mRNA stabilization	0.0264716	0.203622	0	0	2	5
GO:1990051 activation of protein kinase C activity	2	0.0264716	0.207	0.4	Biological Process	GO:1990051	activation of protein kinase C activity	0.0264716	0.203622	0	0	2	5
GO:0018394 peptidyl-lysine acetylation	16	0.0266684	1.658	0.092	Biological Process	GO:0018394	peptidyl-lysine acetylation	0.0266684	0.204933	0	0	16	173
GO:0030218 erythrocyte differentiation	12	0.0269229	1.244	0.102	Biological Process	GO:0030218	erythrocyte differentiation	0.0269229	0.206684	0	0	12	118
GO:0009914 hormone transport	27	0.0269806	2.798	0.081	Biological Process	GO:0009914	hormone transport	0.0269806	0.206922	0	0	27	335
GO:0006836 neurotransmitter transport	23	0.0270435	2.383	0.084	Biological Process	GO:0006836	neurotransmitter transport	0.0270435	0.2072	0	0	23	275
GO:0007188 adenylate cyclase-modulating G protein-coupled receptor signaling pathway	20	0.0272717	2.073	0.087	Biological Process	GO:0007188	adenylate cyclase-modulating G protein-coupled receptor signaling pathway	0.0272717	0.20873	0	0	20	231
GO:0050801 ion homeostasis	58	0.0272969	6.01	0.07	Biological Process	GO:0050801	ion homeostasis	0.0272969	0.20873	0	0	58	826
GO:0032436 positive regulation of proteasomal ubiquitin-dependent protein catabolic process	10	0.0276431	1.036	0.109	Biological Process	GO:0032436	positive regulation of proteasomal ubiquitin-dependent protein catabolic process	0.0276431	0.210962	0	0	10	92
GO:2000177 regulation of neural precursor cell proliferation	10	0.0276431	1.036	0.109	Biological Process	GO:2000177	regulation of neural precursor cell proliferation	0.0276431	0.210962	0	0	10	92
GO:0030003 cellular cation homeostasis	48	0.0277432	4.974	0.072	Biological Process	GO:0030003	cellular cation homeostasis	0.0277432	0.211382	0	0	48	665
GO:0010712 regulation of collagen metabolic process	6	0.0278194	0.622	0.14	Biological Process	GO:0010712	regulation of collagen metabolic process	0.0278194	0.211382	0	0	6	43
GO:2000826 regulation of heart morphogenesis	6	0.0278194	0.622	0.14	Biological Process	GO:2000826	regulation of heart morphogenesis	0.0278194	0.211382	0	0	6	43
GO:0038128 ERBB2 signaling pathway	5	0.0279431	0.518	0.156	Biological Process	GO:0038128	ERBB2 signaling pathway	0.0279431	0.211382	0	0	5	32
GO:0048730 epidermis morphogenesis	5	0.0279431	0.518	0.156	Biological Process	GO:0048730	epidermis morphogenesis	0.0279431	0.211382	0	0	5	32
GO:0051150 regulation of smooth muscle cell differentiation	5	0.0279431	0.518	0.156	Biological Process	GO:0051150	regulation of smooth muscle cell differentiation	0.0279431	0.211382	0	0	5	32
GO:0060603 mammary gland duct morphogenesis	5	0.0279431	0.518	0.156	Biological Process	GO:0060603	mammary gland duct morphogenesis	0.0279431	0.211382	0	0	5	32
GO:0060914 heart formation	5	0.0279431	0.518	0.156	Biological Process	GO:0060914	heart formation	0.0279431	0.211382	0	0	5	32
GO:1904292 regulation of ERAD pathway	5	0.0279431	0.518	0.156	Biological Process	GO:1904292	regulation of ERAD pathway	0.0279431	0.211382	0	0	5	32
GO:0043062 extracellular structure organization	36	0.027993	3.731	0.076	Biological Process	GO:0043062	extracellular structure organization	0.027993	0.211554	0	0	36	475
GO:0006796 phosphate-containing compound metabolic process	209	0.0282921	21.658	0.061	Biological Process	GO:0006796	phosphate-containing compound metabolic process	0.0282921	0.213607	0	0	209	3412
GO:0015833 peptide transport	119	0.0283906	12.332	0.064	Biological Process	GO:0015833	peptide transport	0.0283906	0.214142	0	0	119	1850
GO:0010906 regulation of glucose metabolic process	12	0.0285205	1.244	0.101	Biological Process	GO:0010906	regulation of glucose metabolic process	0.0285205	0.214913	0	0	12	119
GO:0016055 Wnt signaling pathway	39	0.0286353	4.041	0.075	Biological Process	GO:0016055	Wnt signaling pathway	0.0286353	0.21557	0	0	39	523
GO:0003179 heart valve morphogenesis	7	0.0287297	0.725	0.127	Biological Process	GO:0003179	heart valve morphogenesis	0.0287297	0.215862	0	0	7	55
GO:0046854 phosphatidylinositol phosphorylation	7	0.0287297	0.725	0.127	Biological Process	GO:0046854	phosphatidylinositol phosphorylation	0.0287297	0.215862	0	0	7	55
GO:0062012 regulation of small molecule metabolic process	34	0.0289608	3.523	0.076	Biological Process	GO:0062012	regulation of small molecule metabolic process	0.0289608	0.217215	0	0	34	445
GO:0046879 hormone secretion	26	0.0289683	2.694	0.081	Biological Process	GO:0046879	hormone secretion	0.0289683	0.217215	0	0	26	322
GO:0006622 protein targeting to lysosome	4	0.0290497	0.415	0.182	Biological Process	GO:0006622	protein targeting to lysosome	0.0290497	0.217215	0	0	4	22
GO:0043371 negative regulation of CD4-positive, alpha-beta T cell differentiation	4	0.0290497	0.415	0.182	Biological Process	GO:0043371	negative regulation of CD4-positive, alpha-beta T cell differentiation	0.0290497	0.217215	0	0	4	22
GO:0070987 error-free translesion synthesis	4	0.0290497	0.415	0.182	Biological Process	GO:0070987	error-free translesion synthesis	0.0290497	0.217215	0	0	4	22
GO:0051050 positive regulation of transport	65	0.0291915	6.736	0.069	Biological Process	GO:0051050	positive regulation of transport	0.0291915	0.218066	0	0	65	944
GO:1903036 positive regulation of response to wounding	9	0.0293319	0.933	0.113	Biological Process	GO:1903036	positive regulation of response to wounding	0.0293319	0.218905	0	0	9	80
GO:0043524 negative regulation of neuron apoptotic process	14	0.029432	1.451	0.095	Biological Process	GO:0043524	negative regulation of neuron apoptotic process	0.029432	0.219398	0	0	14	147
GO:0061041 regulation of wound healing	15	0.0294545	1.554	0.093	Biological Process	GO:0061041	regulation of wound healing	0.0294545	0.219398	0	0	15	161
GO:0070374 positive regulation of ERK1 and ERK2 cascade	18	0.0296969	1.865	0.088	Biological Process	GO:0070374	positive regulation of ERK1 and ERK2 cascade	0.0296969	0.220991	0	0	18	204
GO:0198738 cell-cell signaling by wnt	39	0.0301446	4.041	0.074	Biological Process	GO:0198738	cell-cell signaling by wnt	0.0301446	0.221732	0	0	39	525
GO:0051345 positive regulation of hydrolase activity	55	0.0301767	5.699	0.07	Biological Process	GO:0051345	positive regulation of hydrolase activity	0.0301767	0.221732	0	0	55	782
GO:0001973 adenosine receptor signaling pathway	3	0.0304529	0.311	0.231	Biological Process	GO:0001973	adenosine receptor signaling pathway	0.0304529	0.221732	0	0	3	13
GO:0002551 mast cell chemotaxis	3	0.0304529	0.311	0.231	Biological Process	GO:0002551	mast cell chemotaxis	0.0304529	0.221732	0	0	3	13
GO:0003222 ventricular trabecula myocardium morphogenesis	3	0.0304529	0.311	0.231	Biological Process	GO:0003222	ventricular trabecula myocardium morphogenesis	0.0304529	0.221732	0	0	3	13
GO:0010635 regulation of mitochondrial fusion	3	0.0304529	0.311	0.231	Biological Process	GO:0010635	regulation of mitochondrial fusion	0.0304529	0.221732	0	0	3	13
GO:0021514 ventral spinal cord interneuron differentiation	3	0.0304529	0.311	0.231	Biological Process	GO:0021514	ventral spinal cord interneuron differentiation	0.0304529	0.221732	0	0	3	13
GO:0030949 positive regulation of vascular endothelial growth factor receptor signaling pathway	3	0.0304529	0.311	0.231	Biological Process	GO:0030949	positive regulation of vascular endothelial growth factor receptor signaling pathway	0.0304529	0.221732	0	0	3	13
GO:0031274 positive regulation of pseudopodium assembly	3	0.0304529	0.311	0.231	Biological Process	GO:0031274	positive regulation of pseudopodium assembly	0.0304529	0.221732	0	0	3	13
GO:0035723 interleukin-15-mediated signaling pathway	3	0.0304529	0.311	0.231	Biological Process	GO:0035723	interleukin-15-mediated signaling pathway	0.0304529	0.221732	0	0	3	13
GO:0045741 positive regulation of epidermal growth factor-activated receptor activity	3	0.0304529	0.311	0.231	Biological Process	GO:0045741	positive regulation of epidermal growth factor-activated receptor activity	0.0304529	0.221732	0	0	3	13
GO:0046349 amino sugar biosynthetic process	3	0.0304529	0.311	0.231	Biological Process	GO:0046349	amino sugar biosynthetic process	0.0304529	0.221732	0	0	3	13
GO:0051451 myoblast migration	3	0.0304529	0.311	0.231	Biological Process	GO:0051451	myoblast migration	0.0304529	0.221732	0	0	3	13
GO:0060576 intestinal epithelial cell development	3	0.0304529	0.311	0.231	Biological Process	GO:0060576	intestinal epithelial cell development	0.0304529	0.221732	0	0	3	13
GO:0060788 ectodermal placode formation	3	0.0304529	0.311	0.231	Biological Process	GO:0060788	ectodermal placode formation	0.0304529	0.221732	0	0	3	13
GO:0070254 mucus secretion	3	0.0304529	0.311	0.231	Biological Process	GO:0070254	mucus secretion	0.0304529	0.221732	0	0	3	13
GO:0071350 cellular response to interleukin-15	3	0.0304529	0.311	0.231	Biological Process	GO:0071350	cellular response to interleukin-15	0.0304529	0.221732	0	0	3	13
GO:0071697 ectodermal placode morphogenesis	3	0.0304529	0.311	0.231	Biological Process	GO:0071697	ectodermal placode morphogenesis	0.0304529	0.221732	0	0	3	13
GO:0090594 inflammatory response to wounding	3	0.0304529	0.311	0.231	Biological Process	GO:0090594	inflammatory response to wounding	0.0304529	0.221732	0	0	3	13
GO:1902306 negative regulation of sodium ion transmembrane transport	3	0.0304529	0.311	0.231	Biological Process	GO:1902306	negative regulation of sodium ion transmembrane transport	0.0304529	0.221732	0	0	3	13
GO:1903726 negative regulation of phospholipid metabolic process	3	0.0304529	0.311	0.231	Biological Process	GO:1903726	negative regulation of phospholipid metabolic process	0.0304529	0.221732	0	0	3	13
GO:1904152 regulation of retrograde protein transport, ER to cytosol	3	0.0304529	0.311	0.231	Biological Process	GO:1904152	regulation of retrograde protein transport, ER to cytosol	0.0304529	0.221732	0	0	3	13
GO:1905244 regulation of modification of synaptic structure	3	0.0304529	0.311	0.231	Biological Process	GO:1905244	regulation of modification of synaptic structure	0.0304529	0.221732	0	0	3	13
GO:1904888 cranial skeletal system development	8	0.0306768	0.829	0.118	Biological Process	GO:1904888	cranial skeletal system development	0.0306768	0.222879	0	0	8	68
GO:0060070 canonical Wnt signaling pathway	27	0.0307216	2.798	0.08	Biological Process	GO:0060070	canonical Wnt signaling pathway	0.0307216	0.222879	0	0	27	339
GO:0008631 intrinsic apoptotic signaling pathway in response to oxidative stress	6	0.0307825	0.622	0.136	Biological Process	GO:0008631	intrinsic apoptotic signaling pathway in response to oxidative stress	0.0307825	0.222879	0	0	6	44
GO:0017145 stem cell division	6	0.0307825	0.622	0.136	Biological Process	GO:0017145	stem cell division	0.0307825	0.222879	0	0	6	44
GO:0060711 labyrinthine layer development	6	0.0307825	0.622	0.136	Biological Process	GO:0060711	labyrinthine layer development	0.0307825	0.222879	0	0	6	44
GO:2000772 regulation of cellular senescence	6	0.0307825	0.622	0.136	Biological Process	GO:2000772	regulation of cellular senescence	0.0307825	0.222879	0	0	6	44
GO:0051452 intracellular pH reduction	7	0.0313508	0.725	0.125	Biological Process	GO:0051452	intracellular pH reduction	0.0313508	0.226436	0	0	7	56
GO:0021766 hippocampus development	9	0.0314698	0.933	0.111	Biological Process	GO:0021766	hippocampus development	0.0314698	0.226436	0	0	9	81
GO:0032410 negative regulation of transporter activity	9	0.0314698	0.933	0.111	Biological Process	GO:0032410	negative regulation of transporter activity	0.0314698	0.226436	0	0	9	81
GO:0006376 mRNA splice site selection	5	0.0315069	0.518	0.152	Biological Process	GO:0006376	mRNA splice site selection	0.0315069	0.226436	0	0	5	33
GO:0042573 retinoic acid metabolic process	5	0.0315069	0.518	0.152	Biological Process	GO:0042573	retinoic acid metabolic process	0.0315069	0.226436	0	0	5	33
GO:0048536 spleen development	5	0.0315069	0.518	0.152	Biological Process	GO:0048536	spleen development	0.0315069	0.226436	0	0	5	33
GO:0090075 relaxation of muscle	5	0.0315069	0.518	0.152	Biological Process	GO:0090075	relaxation of muscle	0.0315069	0.226436	0	0	5	33
GO:1902692 regulation of neuroblast proliferation	5	0.0315069	0.518	0.152	Biological Process	GO:1902692	regulation of neuroblast proliferation	0.0315069	0.226436	0	0	5	33
GO:0048880 sensory system development	30	0.031633	3.109	0.078	Biological Process	GO:0048880	sensory system development	0.031633	0.227132	0	0	30	386
GO:0002521 leukocyte differentiation	41	0.0319055	4.249	0.073	Biological Process	GO:0002521	leukocyte differentiation	0.0319055	0.228764	0	0	41	559
GO:1903050 regulation of proteolysis involved in cellular protein catabolic process	20	0.0319192	2.073	0.085	Biological Process	GO:1903050	regulation of proteolysis involved in cellular protein catabolic process	0.0319192	0.228764	0	0	20	235
GO:0009306 protein secretion	29	0.032036	3.005	0.078	Biological Process	GO:0009306	protein secretion	0.032036	0.22939	0	0	29	371
GO:0051222 positive regulation of protein transport	25	0.0321618	2.591	0.081	Biological Process	GO:0051222	positive regulation of protein transport	0.0321618	0.230078	0	0	25	310
GO:0019725 cellular homeostasis	66	0.0323773	6.839	0.068	Biological Process	GO:0019725	cellular homeostasis	0.0323773	0.231282	0	0	66	966
GO:0030168 platelet activation	15	0.0323895	1.554	0.092	Biological Process	GO:0030168	platelet activation	0.0323895	0.231282	0	0	15	163
GO:0060041 retina development in camera-type eye	14	0.0325204	1.451	0.094	Biological Process	GO:0060041	retina development in camera-type eye	0.0325204	0.232003	0	0	14	149
GO:1901342 regulation of vasculature development	27	0.0327345	2.798	0.079	Biological Process	GO:1901342	regulation of vasculature development	0.0327345	0.233236	0	0	27	341
GO:0055082 cellular chemical homeostasis	58	0.0327533	6.01	0.069	Biological Process	GO:0055082	cellular chemical homeostasis	0.0327533	0.233236	0	0	58	835
GO:0045785 positive regulation of cell adhesion	33	0.0329241	3.42	0.076	Biological Process	GO:0045785	positive regulation of cell adhesion	0.0329241	0.234238	0	0	33	434
GO:0051649 establishment of localization in cell	142	0.0330756	14.715	0.063	Biological Process	GO:0051649	establishment of localization in cell	0.0330756	0.2351	0	0	142	2257
GO:0090303 positive regulation of wound healing	8	0.0331116	0.829	0.116	Biological Process	GO:0090303	positive regulation of wound healing	0.0331116	0.235141	0	0	8	69
GO:0098771 inorganic ion homeostasis	53	0.0331748	5.492	0.07	Biological Process	GO:0098771	inorganic ion homeostasis	0.0331748	0.235374	0	0	53	754
GO:0044262 cellular carbohydrate metabolic process	24	0.0334067	2.487	0.081	Biological Process	GO:0044262	cellular carbohydrate metabolic process	0.0334067	0.236804	0	0	24	296
GO:1903312 negative regulation of mRNA metabolic process	10	0.0335552	1.036	0.105	Biological Process	GO:1903312	negative regulation of mRNA metabolic process	0.0335552	0.236818	0	0	10	95
GO:0001702 gastrulation with mouth forming second	4	0.0336963	0.415	0.174	Biological Process	GO:0001702	gastrulation with mouth forming second	0.0336963	0.236818	0	0	4	23
GO:0002043 blood vessel endothelial cell proliferation involved in sprouting angiogenesis	4	0.0336963	0.415	0.174	Biological Process	GO:0002043	blood vessel endothelial cell proliferation involved in sprouting angiogenesis	0.0336963	0.236818	0	0	4	23
GO:0002052 positive regulation of neuroblast proliferation	4	0.0336963	0.415	0.174	Biological Process	GO:0002052	positive regulation of neuroblast proliferation	0.0336963	0.236818	0	0	4	23
GO:0009226 nucleotide-sugar biosynthetic process	4	0.0336963	0.415	0.174	Biological Process	GO:0009226	nucleotide-sugar biosynthetic process	0.0336963	0.236818	0	0	4	23
GO:0035162 embryonic hemopoiesis	4	0.0336963	0.415	0.174	Biological Process	GO:0035162	embryonic hemopoiesis	0.0336963	0.236818	0	0	4	23
GO:0042359 vitamin D metabolic process	4	0.0336963	0.415	0.174	Biological Process	GO:0042359	vitamin D metabolic process	0.0336963	0.236818	0	0	4	23
GO:0060384 innervation	4	0.0336963	0.415	0.174	Biological Process	GO:0060384	innervation	0.0336963	0.236818	0	0	4	23
GO:0099563 modification of synaptic structure	4	0.0336963	0.415	0.174	Biological Process	GO:0099563	modification of synaptic structure	0.0336963	0.236818	0	0	4	23
GO:0001570 vasculogenesis	9	0.0337136	0.933	0.11	Biological Process	GO:0001570	vasculogenesis	0.0337136	0.236818	0	0	9	82
GO:0048701 embryonic cranial skeleton morphogenesis	6	0.0339444	0.622	0.133	Biological Process	GO:0048701	embryonic cranial skeleton morphogenesis	0.0339444	0.238217	0	0	6	45
GO:0000186 activation of MAPKK activity	7	0.0341274	0.725	0.123	Biological Process	GO:0000186	activation of MAPKK activity	0.0341274	0.238217	0	0	7	57
GO:0014743 regulation of muscle hypertrophy	7	0.0341274	0.725	0.123	Biological Process	GO:0014743	regulation of muscle hypertrophy	0.0341274	0.238217	0	0	7	57
GO:0043525 positive regulation of neuron apoptotic process	7	0.0341274	0.725	0.123	Biological Process	GO:0043525	positive regulation of neuron apoptotic process	0.0341274	0.238217	0	0	7	57
GO:0048255 mRNA stabilization	7	0.0341274	0.725	0.123	Biological Process	GO:0048255	mRNA stabilization	0.0341274	0.238217	0	0	7	57
GO:1902041 regulation of extrinsic apoptotic signaling pathway via death domain receptors	7	0.0341274	0.725	0.123	Biological Process	GO:1902041	regulation of extrinsic apoptotic signaling pathway via death domain receptors	0.0341274	0.238217	0	0	7	57
GO:2000242 negative regulation of reproductive process	7	0.0341274	0.725	0.123	Biological Process	GO:2000242	negative regulation of reproductive process	0.0341274	0.238217	0	0	7	57
GO:1904018 positive regulation of vasculature development	17	0.0343908	1.762	0.088	Biological Process	GO:1904018	positive regulation of vasculature development	0.0343908	0.23984	0	0	17	193
GO:0033138 positive regulation of peptidyl-serine phosphorylation	11	0.0348694	1.14	0.101	Biological Process	GO:0033138	positive regulation of peptidyl-serine phosphorylation	0.0348694	0.242742	0	0	11	109
GO:2000060 positive regulation of ubiquitin-dependent protein catabolic process	11	0.0348694	1.14	0.101	Biological Process	GO:2000060	positive regulation of ubiquitin-dependent protein catabolic process	0.0348694	0.242742	0	0	11	109
GO:1901215 negative regulation of neuron death	18	0.0350347	1.865	0.087	Biological Process	GO:1901215	negative regulation of neuron death	0.0350347	0.243675	0	0	18	208
GO:0000083 regulation of transcription involved in G1/S transition of mitotic cell cycle	5	0.0353426	0.518	0.147	Biological Process	GO:0000083	regulation of transcription involved in G1/S transition of mitotic cell cycle	0.0353426	0.245376	0	0	5	34
GO:1904031 positive regulation of cyclin-dependent protein kinase activity	5	0.0353426	0.518	0.147	Biological Process	GO:1904031	positive regulation of cyclin-dependent protein kinase activity	0.0353426	0.245376	0	0	5	34
GO:0021987 cerebral cortex development	12	0.0355996	1.244	0.098	Biological Process	GO:0021987	cerebral cortex development	0.0355996	0.2465	0	0	12	123
GO:0048675 axon extension	12	0.0355996	1.244	0.098	Biological Process	GO:0048675	axon extension	0.0355996	0.2465	0	0	12	123
GO:0048706 embryonic skeletal system development	12	0.0355996	1.244	0.098	Biological Process	GO:0048706	embryonic skeletal system development	0.0355996	0.2465	0	0	12	123
GO:0003208 cardiac ventricle morphogenesis	8	0.0356746	0.829	0.114	Biological Process	GO:0003208	cardiac ventricle morphogenesis	0.0356746	0.24658	0	0	8	70
GO:0046834 lipid phosphorylation	8	0.0356746	0.829	0.114	Biological Process	GO:0046834	lipid phosphorylation	0.0356746	0.24658	0	0	8	70
GO:0043255 regulation of carbohydrate biosynthetic process	10	0.0357084	1.036	0.104	Biological Process	GO:0043255	regulation of carbohydrate biosynthetic process	0.0357084	0.246595	0	0	10	96
GO:0010508 positive regulation of autophagy	13	0.0358867	1.347	0.095	Biological Process	GO:0010508	positive regulation of autophagy	0.0358867	0.247605	0	0	13	137
GO:0003012 muscle system process	33	0.0367329	3.42	0.075	Biological Process	GO:0003012	muscle system process	0.0367329	0.247694	0	0	33	438
GO:0061387 regulation of extent of cell growth	11	0.0369217	1.14	0.1	Biological Process	GO:0061387	regulation of extent of cell growth	0.0369217	0.247694	0	0	11	110
GO:0007405 neuroblast proliferation	7	0.0370625	0.725	0.121	Biological Process	GO:0007405	neuroblast proliferation	0.0370625	0.247694	0	0	7	58
GO:0016266 O-glycan processing	7	0.0370625	0.725	0.121	Biological Process	GO:0016266	O-glycan processing	0.0370625	0.247694	0	0	7	58
GO:0050432 catecholamine secretion	7	0.0370625	0.725	0.121	Biological Process	GO:0050432	catecholamine secretion	0.0370625	0.247694	0	0	7	58
GO:0001654 eye development	29	0.0371672	3.005	0.077	Biological Process	GO:0001654	eye development	0.0371672	0.247694	0	0	29	376
GO:0046661 male sex differentiation	15	0.0371845	1.554	0.09	Biological Process	GO:0046661	male sex differentiation	0.0371845	0.247694	0	0	15	166
GO:0070304 positive regulation of stress-activated protein kinase signaling cascade	15	0.0371845	1.554	0.09	Biological Process	GO:0070304	positive regulation of stress-activated protein kinase signaling cascade	0.0371845	0.247694	0	0	15	166
GO:0001711 endodermal cell fate commitment	3	0.0372276	0.311	0.214	Biological Process	GO:0001711	endodermal cell fate commitment	0.0372276	0.247694	0	0	3	14
GO:0002829 negative regulation of type 2 immune response	3	0.0372276	0.311	0.214	Biological Process	GO:0002829	negative regulation of type 2 immune response	0.0372276	0.247694	0	0	3	14
GO:0021694 cerebellar Purkinje cell layer formation	3	0.0372276	0.311	0.214	Biological Process	GO:0021694	cerebellar Purkinje cell layer formation	0.0372276	0.247694	0	0	3	14
GO:0021859 pyramidal neuron differentiation	3	0.0372276	0.311	0.214	Biological Process	GO:0021859	pyramidal neuron differentiation	0.0372276	0.247694	0	0	3	14
GO:0031272 regulation of pseudopodium assembly	3	0.0372276	0.311	0.214	Biological Process	GO:0031272	regulation of pseudopodium assembly	0.0372276	0.247694	0	0	3	14
GO:0032486 Rap protein signal transduction	3	0.0372276	0.311	0.214	Biological Process	GO:0032486	Rap protein signal transduction	0.0372276	0.247694	0	0	3	14
GO:0034393 positive regulation of smooth muscle cell apoptotic process	3	0.0372276	0.311	0.214	Biological Process	GO:0034393	positive regulation of smooth muscle cell apoptotic process	0.0372276	0.247694	0	0	3	14
GO:0042659 regulation of cell fate specification	3	0.0372276	0.311	0.214	Biological Process	GO:0042659	regulation of cell fate specification	0.0372276	0.247694	0	0	3	14
GO:0048368 lateral mesoderm development	3	0.0372276	0.311	0.214	Biological Process	GO:0048368	lateral mesoderm development	0.0372276	0.247694	0	0	3	14
GO:0050966 detection of mechanical stimulus involved in sensory perception of pain	3	0.0372276	0.311	0.214	Biological Process	GO:0050966	detection of mechanical stimulus involved in sensory perception of pain	0.0372276	0.247694	0	0	3	14
GO:0051917 regulation of fibrinolysis	3	0.0372276	0.311	0.214	Biological Process	GO:0051917	regulation of fibrinolysis	0.0372276	0.247694	0	0	3	14
GO:0070672 response to interleukin-15	3	0.0372276	0.311	0.214	Biological Process	GO:0070672	response to interleukin-15	0.0372276	0.247694	0	0	3	14
GO:0071696 ectodermal placode development	3	0.0372276	0.311	0.214	Biological Process	GO:0071696	ectodermal placode development	0.0372276	0.247694	0	0	3	14
GO:0090239 regulation of histone H4 acetylation	3	0.0372276	0.311	0.214	Biological Process	GO:0090239	regulation of histone H4 acetylation	0.0372276	0.247694	0	0	3	14
GO:0097531 mast cell migration	3	0.0372276	0.311	0.214	Biological Process	GO:0097531	mast cell migration	0.0372276	0.247694	0	0	3	14
GO:1901841 regulation of high voltage-gated calcium channel activity	3	0.0372276	0.311	0.214	Biological Process	GO:1901841	regulation of high voltage-gated calcium channel activity	0.0372276	0.247694	0	0	3	14
GO:1903362 regulation of cellular protein catabolic process	22	0.0372337	2.28	0.082	Biological Process	GO:1903362	regulation of cellular protein catabolic process	0.0372337	0.247694	0	0	22	269
GO:0045581 negative regulation of T cell differentiation	6	0.0373087	0.622	0.13	Biological Process	GO:0045581	negative regulation of T cell differentiation	0.0373087	0.247694	0	0	6	46
GO:0009987 cellular process	899	0.0374898	93.161	0.055	Biological Process	GO:0009987	cellular process	0.0374898	0.247694	0	0	899	16251
GO:0002040 sprouting angiogenesis	12	0.0375481	1.244	0.097	Biological Process	GO:0002040	sprouting angiogenesis	0.0375481	0.247694	0	0	12	124
GO:0014020 primary neural tube formation	10	0.0379559	1.036	0.103	Biological Process	GO:0014020	primary neural tube formation	0.0379559	0.247694	0	0	10	97
GO:0030316 osteoclast differentiation	10	0.0379559	1.036	0.103	Biological Process	GO:0030316	osteoclast differentiation	0.0379559	0.247694	0	0	10	97
GO:0006935 chemotaxis	46	0.0381814	4.767	0.071	Biological Process	GO:0006935	chemotaxis	0.0381814	0.247694	0	0	46	647
GO:0001996 positive regulation of heart rate by epinephrine-norepinephrine	2	0.0382907	0.207	0.333	Biological Process	GO:0001996	positive regulation of heart rate by epinephrine-norepinephrine	0.0382907	0.247694	0	0	2	6
GO:0002248 connective tissue replacement involved in inflammatory response wound healing	2	0.0382907	0.207	0.333	Biological Process	GO:0002248	connective tissue replacement involved in inflammatory response wound healing	0.0382907	0.247694	0	0	2	6
GO:0003348 cardiac endothelial cell differentiation	2	0.0382907	0.207	0.333	Biological Process	GO:0003348	cardiac endothelial cell differentiation	0.0382907	0.247694	0	0	2	6
GO:0014060 regulation of epinephrine secretion	2	0.0382907	0.207	0.333	Biological Process	GO:0014060	regulation of epinephrine secretion	0.0382907	0.247694	0	0	2	6
GO:0021785 branchiomotor neuron axon guidance	2	0.0382907	0.207	0.333	Biological Process	GO:0021785	branchiomotor neuron axon guidance	0.0382907	0.247694	0	0	2	6
GO:0021825 substrate-dependent cerebral cortex tangential migration	2	0.0382907	0.207	0.333	Biological Process	GO:0021825	substrate-dependent cerebral cortex tangential migration	0.0382907	0.247694	0	0	2	6
GO:0021853 cerebral cortex GABAergic interneuron migration	2	0.0382907	0.207	0.333	Biological Process	GO:0021853	cerebral cortex GABAergic interneuron migration	0.0382907	0.247694	0	0	2	6
GO:0031584 activation of phospholipase D activity	2	0.0382907	0.207	0.333	Biological Process	GO:0031584	activation of phospholipase D activity	0.0382907	0.247694	0	0	2	6
GO:0033087 negative regulation of immature T cell proliferation	2	0.0382907	0.207	0.333	Biological Process	GO:0033087	negative regulation of immature T cell proliferation	0.0382907	0.247694	0	0	2	6
GO:0034136 negative regulation of toll-like receptor 2 signaling pathway	2	0.0382907	0.207	0.333	Biological Process	GO:0034136	negative regulation of toll-like receptor 2 signaling pathway	0.0382907	0.247694	0	0	2	6
GO:0034773 histone H4-K20 trimethylation	2	0.0382907	0.207	0.333	Biological Process	GO:0034773	histone H4-K20 trimethylation	0.0382907	0.247694	0	0	2	6
GO:0035502 metanephric part of ureteric bud development	2	0.0382907	0.207	0.333	Biological Process	GO:0035502	metanephric part of ureteric bud development	0.0382907	0.247694	0	0	2	6
GO:0035964 COPI-coated vesicle budding	2	0.0382907	0.207	0.333	Biological Process	GO:0035964	COPI-coated vesicle budding	0.0382907	0.247694	0	0	2	6
GO:0045627 positive regulation of T-helper 1 cell differentiation	2	0.0382907	0.207	0.333	Biological Process	GO:0045627	positive regulation of T-helper 1 cell differentiation	0.0382907	0.247694	0	0	2	6
GO:0048200 Golgi transport vesicle coating	2	0.0382907	0.207	0.333	Biological Process	GO:0048200	Golgi transport vesicle coating	0.0382907	0.247694	0	0	2	6
GO:0048205 COPI coating of Golgi vesicle	2	0.0382907	0.207	0.333	Biological Process	GO:0048205	COPI coating of Golgi vesicle	0.0382907	0.247694	0	0	2	6
GO:0050904 diapedesis	2	0.0382907	0.207	0.333	Biological Process	GO:0050904	diapedesis	0.0382907	0.247694	0	0	2	6
GO:0051891 positive regulation of cardioblast differentiation	2	0.0382907	0.207	0.333	Biological Process	GO:0051891	positive regulation of cardioblast differentiation	0.0382907	0.247694	0	0	2	6
GO:0060526 prostate glandular acinus morphogenesis	2	0.0382907	0.207	0.333	Biological Process	GO:0060526	prostate glandular acinus morphogenesis	0.0382907	0.247694	0	0	2	6
GO:0060527 prostate epithelial cord arborization involved in prostate glandular acinus morphogenesis	2	0.0382907	0.207	0.333	Biological Process	GO:0060527	prostate epithelial cord arborization involved in prostate glandular acinus morphogenesis	0.0382907	0.247694	0	0	2	6
GO:0060684 epithelial-mesenchymal cell signaling	2	0.0382907	0.207	0.333	Biological Process	GO:0060684	epithelial-mesenchymal cell signaling	0.0382907	0.247694	0	0	2	6
GO:0060754 positive regulation of mast cell chemotaxis	2	0.0382907	0.207	0.333	Biological Process	GO:0060754	positive regulation of mast cell chemotaxis	0.0382907	0.247694	0	0	2	6
GO:0060956 endocardial cell differentiation	2	0.0382907	0.207	0.333	Biological Process	GO:0060956	endocardial cell differentiation	0.0382907	0.247694	0	0	2	6
GO:0061038 uterus morphogenesis	2	0.0382907	0.207	0.333	Biological Process	GO:0061038	uterus morphogenesis	0.0382907	0.247694	0	0	2	6
GO:0061196 fungiform papilla development	2	0.0382907	0.207	0.333	Biological Process	GO:0061196	fungiform papilla development	0.0382907	0.247694	0	0	2	6
GO:0061419 positive regulation of transcription from RNA polymerase II promoter in response to hypoxia	2	0.0382907	0.207	0.333	Biological Process	GO:0061419	positive regulation of transcription from RNA polymerase II promoter in response to hypoxia	0.0382907	0.247694	0	0	2	6
GO:0070640 vitamin D3 metabolic process	2	0.0382907	0.207	0.333	Biological Process	GO:0070640	vitamin D3 metabolic process	0.0382907	0.247694	0	0	2	6
GO:0072284 metanephric S-shaped body morphogenesis	2	0.0382907	0.207	0.333	Biological Process	GO:0072284	metanephric S-shaped body morphogenesis	0.0382907	0.247694	0	0	2	6
GO:0090186 regulation of pancreatic juice secretion	2	0.0382907	0.207	0.333	Biological Process	GO:0090186	regulation of pancreatic juice secretion	0.0382907	0.247694	0	0	2	6
GO:0090241 negative regulation of histone H4 acetylation	2	0.0382907	0.207	0.333	Biological Process	GO:0090241	negative regulation of histone H4 acetylation	0.0382907	0.247694	0	0	2	6
GO:0097211 cellular response to gonadotropin-releasing hormone	2	0.0382907	0.207	0.333	Biological Process	GO:0097211	cellular response to gonadotropin-releasing hormone	0.0382907	0.247694	0	0	2	6
GO:0097494 regulation of vesicle size	2	0.0382907	0.207	0.333	Biological Process	GO:0097494	regulation of vesicle size	0.0382907	0.247694	0	0	2	6
GO:1901897 regulation of relaxation of cardiac muscle	2	0.0382907	0.207	0.333	Biological Process	GO:1901897	regulation of relaxation of cardiac muscle	0.0382907	0.247694	0	0	2	6
GO:1903232 melanosome assembly	2	0.0382907	0.207	0.333	Biological Process	GO:1903232	melanosome assembly	0.0382907	0.247694	0	0	2	6
GO:1903588 negative regulation of blood vessel endothelial cell proliferation involved in sprouting angiogenesis	2	0.0382907	0.207	0.333	Biological Process	GO:1903588	negative regulation of blood vessel endothelial cell proliferation involved in sprouting angiogenesis	0.0382907	0.247694	0	0	2	6
GO:1904778 positive regulation of protein localization to cell cortex	2	0.0382907	0.207	0.333	Biological Process	GO:1904778	positive regulation of protein localization to cell cortex	0.0382907	0.247694	0	0	2	6
GO:1905005 regulation of epithelial to mesenchymal transition involved in endocardial cushion formation	2	0.0382907	0.207	0.333	Biological Process	GO:1905005	regulation of epithelial to mesenchymal transition involved in endocardial cushion formation	0.0382907	0.247694	0	0	2	6
GO:1905203 regulation of connective tissue replacement	2	0.0382907	0.207	0.333	Biological Process	GO:1905203	regulation of connective tissue replacement	0.0382907	0.247694	0	0	2	6
GO:1905671 regulation of lysosome organization	2	0.0382907	0.207	0.333	Biological Process	GO:1905671	regulation of lysosome organization	0.0382907	0.247694	0	0	2	6
GO:1905770 regulation of mesodermal cell differentiation	2	0.0382907	0.207	0.333	Biological Process	GO:1905770	regulation of mesodermal cell differentiation	0.0382907	0.247694	0	0	2	6
GO:1905868 regulation of 3'-UTR-mediated mRNA stabilization	2	0.0382907	0.207	0.333	Biological Process	GO:1905868	regulation of 3'-UTR-mediated mRNA stabilization	0.0382907	0.247694	0	0	2	6
GO:1905902 regulation of mesoderm formation	2	0.0382907	0.207	0.333	Biological Process	GO:1905902	regulation of mesoderm formation	0.0382907	0.247694	0	0	2	6
GO:2000382 positive regulation of mesoderm development	2	0.0382907	0.207	0.333	Biological Process	GO:2000382	positive regulation of mesoderm development	0.0382907	0.247694	0	0	2	6
GO:2001015 negative regulation of skeletal muscle cell differentiation	2	0.0382907	0.207	0.333	Biological Process	GO:2001015	negative regulation of skeletal muscle cell differentiation	0.0382907	0.247694	0	0	2	6
GO:0044786 cell cycle DNA replication	8	0.0383682	0.829	0.113	Biological Process	GO:0044786	cell cycle DNA replication	0.0383682	0.247988	0	0	8	71
GO:0045445 myoblast differentiation	9	0.038527	0.933	0.107	Biological Process	GO:0045445	myoblast differentiation	0.038527	0.248801	0	0	9	84
GO:0045637 regulation of myeloid cell differentiation	21	0.038598	2.176	0.082	Biological Process	GO:0045637	regulation of myeloid cell differentiation	0.038598	0.248801	0	0	21	255
GO:0006873 cellular ion homeostasis	48	0.0386725	4.974	0.071	Biological Process	GO:0006873	cellular ion homeostasis	0.0386725	0.248801	0	0	48	680
GO:0001783 B cell apoptotic process	4	0.0387501	0.415	0.167	Biological Process	GO:0001783	B cell apoptotic process	0.0387501	0.248801	0	0	4	24
GO:0003181 atrioventricular valve morphogenesis	4	0.0387501	0.415	0.167	Biological Process	GO:0003181	atrioventricular valve morphogenesis	0.0387501	0.248801	0	0	4	24
GO:0010288 response to lead ion	4	0.0387501	0.415	0.167	Biological Process	GO:0010288	response to lead ion	0.0387501	0.248801	0	0	4	24
GO:0071425 hematopoietic stem cell proliferation	4	0.0387501	0.415	0.167	Biological Process	GO:0071425	hematopoietic stem cell proliferation	0.0387501	0.248801	0	0	4	24
GO:0090103 cochlea morphogenesis	4	0.0387501	0.415	0.167	Biological Process	GO:0090103	cochlea morphogenesis	0.0387501	0.248801	0	0	4	24
GO:0048839 inner ear development	17	0.0389582	1.762	0.087	Biological Process	GO:0048839	inner ear development	0.0389582	0.249931	0	0	17	196
GO:0002790 peptide secretion	31	0.0391626	3.212	0.076	Biological Process	GO:0002790	peptide secretion	0.0391626	0.251035	0	0	31	409
GO:1903707 negative regulation of hemopoiesis	14	0.039391	1.451	0.092	Biological Process	GO:1903707	negative regulation of hemopoiesis	0.039391	0.25207	0	0	14	153
GO:0021696 cerebellar cortex morphogenesis	5	0.0394539	0.518	0.143	Biological Process	GO:0021696	cerebellar cortex morphogenesis	0.0394539	0.25207	0	0	5	35
GO:0048009 insulin-like growth factor receptor signaling pathway	5	0.0394539	0.518	0.143	Biological Process	GO:0048009	insulin-like growth factor receptor signaling pathway	0.0394539	0.25207	0	0	5	35
GO:0048048 embryonic eye morphogenesis	5	0.0394539	0.518	0.143	Biological Process	GO:0048048	embryonic eye morphogenesis	0.0394539	0.25207	0	0	5	35
GO:0010811 positive regulation of cell-substrate adhesion	12	0.0395708	1.244	0.096	Biological Process	GO:0010811	positive regulation of cell-substrate adhesion	0.0395708	0.252609	0	0	12	125
GO:0046887 positive regulation of hormone secretion	13	0.0396453	1.347	0.094	Biological Process	GO:0046887	positive regulation of hormone secretion	0.0396453	0.252877	0	0	13	139
GO:0050770 regulation of axonogenesis	16	0.03987	1.658	0.088	Biological Process	GO:0050770	regulation of axonogenesis	0.03987	0.254044	0	0	16	182
GO:0048872 homeostasis of number of cells	22	0.0398937	2.28	0.081	Biological Process	GO:0048872	homeostasis of number of cells	0.0398937	0.254044	0	0	22	271
GO:0000045 autophagosome assembly	10	0.0402991	1.036	0.102	Biological Process	GO:0000045	autophagosome assembly	0.0402991	0.256416	0	0	10	98
GO:0043254 regulation of protein complex assembly	39	0.0405355	4.041	0.073	Biological Process	GO:0043254	regulation of protein complex assembly	0.0405355	0.257709	0	0	39	537
GO:0042330 taxis	46	0.0407581	4.767	0.071	Biological Process	GO:0042330	taxis	0.0407581	0.258621	0	0	46	650
GO:0006775 fat-soluble vitamin metabolic process	6	0.0408787	0.622	0.128	Biological Process	GO:0006775	fat-soluble vitamin metabolic process	0.0408787	0.258621	0	0	6	47
GO:0032527 protein exit from endoplasmic reticulum	6	0.0408787	0.622	0.128	Biological Process	GO:0032527	protein exit from endoplasmic reticulum	0.0408787	0.258621	0	0	6	47
GO:0035722 interleukin-12-mediated signaling pathway	6	0.0408787	0.622	0.128	Biological Process	GO:0035722	interleukin-12-mediated signaling pathway	0.0408787	0.258621	0	0	6	47
GO:0045843 negative regulation of striated muscle tissue development	6	0.0408787	0.622	0.128	Biological Process	GO:0045843	negative regulation of striated muscle tissue development	0.0408787	0.258621	0	0	6	47
GO:0048483 autonomic nervous system development	6	0.0408787	0.622	0.128	Biological Process	GO:0048483	autonomic nervous system development	0.0408787	0.258621	0	0	6	47
GO:0030193 regulation of blood coagulation	9	0.0411005	0.933	0.106	Biological Process	GO:0030193	regulation of blood coagulation	0.0411005	0.259602	0	0	9	85
GO:0051899 membrane depolarization	9	0.0411005	0.933	0.106	Biological Process	GO:0051899	membrane depolarization	0.0411005	0.259602	0	0	9	85
GO:0042982 amyloid precursor protein metabolic process	8	0.0411945	0.829	0.111	Biological Process	GO:0042982	amyloid precursor protein metabolic process	0.0411945	0.259984	0	0	8	72
GO:0015931 nucleobase-containing compound transport	21	0.0414154	2.176	0.082	Biological Process	GO:0015931	nucleobase-containing compound transport	0.0414154	0.261166	0	0	21	257
GO:0150063 visual system development	29	0.0416997	3.005	0.076	Biological Process	GO:0150063	visual system development	0.0416997	0.26212	0	0	29	380
GO:0010506 regulation of autophagy	27	0.0417981	2.798	0.077	Biological Process	GO:0010506	regulation of autophagy	0.0417981	0.26212	0	0	27	349
GO:0019933 cAMP-mediated signaling	17	0.0422377	1.762	0.086	Biological Process	GO:0019933	cAMP-mediated signaling	0.0422377	0.26212	0	0	17	198
GO:0009101 glycoprotein biosynthetic process	26	0.0423794	2.694	0.078	Biological Process	GO:0009101	glycoprotein biosynthetic process	0.0423794	0.26212	0	0	26	334
GO:0006352 DNA-templated transcription, initiation	23	0.0424057	2.383	0.08	Biological Process	GO:0006352	DNA-templated transcription, initiation	0.0424057	0.26212	0	0	23	288
GO:0043281 regulation of cysteine-type endopeptidase activity involved in apoptotic process	18	0.0426599	1.865	0.085	Biological Process	GO:0043281	regulation of cysteine-type endopeptidase activity involved in apoptotic process	0.0426599	0.26212	0	0	18	213
GO:0019218 regulation of steroid metabolic process	10	0.0427396	1.036	0.101	Biological Process	GO:0019218	regulation of steroid metabolic process	0.0427396	0.26212	0	0	10	99
GO:0000187 activation of MAPK activity	14	0.0431887	1.451	0.09	Biological Process	GO:0000187	activation of MAPK activity	0.0431887	0.26212	0	0	14	155
GO:1903169 regulation of calcium ion transmembrane transport	14	0.0431887	1.451	0.09	Biological Process	GO:1903169	regulation of calcium ion transmembrane transport	0.0431887	0.26212	0	0	14	155
GO:0051130 positive regulation of cellular component organization	87	0.043245	9.016	0.065	Biological Process	GO:0051130	positive regulation of cellular component organization	0.043245	0.26212	0	0	87	1335
GO:0042326 negative regulation of phosphorylation	34	0.04325	3.523	0.074	Biological Process	GO:0042326	negative regulation of phosphorylation	0.04325	0.26212	0	0	34	460
GO:0006940 regulation of smooth muscle contraction	7	0.0434193	0.725	0.117	Biological Process	GO:0006940	regulation of smooth muscle contraction	0.0434193	0.26212	0	0	7	60
GO:0009100 glycoprotein metabolic process	31	0.0436747	3.212	0.075	Biological Process	GO:0009100	glycoprotein metabolic process	0.0436747	0.26212	0	0	31	413
GO:0043547 positive regulation of GTPase activity	31	0.0436747	3.212	0.075	Biological Process	GO:0043547	positive regulation of GTPase activity	0.0436747	0.26212	0	0	31	413
GO:0048864 stem cell development	9	0.0437876	0.933	0.105	Biological Process	GO:0048864	stem cell development	0.0437876	0.26212	0	0	9	86
GO:0072331 signal transduction by p53 class mediator	23	0.0438085	2.383	0.08	Biological Process	GO:0072331	signal transduction by p53 class mediator	0.0438085	0.26212	0	0	23	289
GO:0034101 erythrocyte homeostasis	12	0.0438427	1.244	0.094	Biological Process	GO:0034101	erythrocyte homeostasis	0.0438427	0.26212	0	0	12	127
GO:0003230 cardiac atrium development	5	0.0438442	0.518	0.139	Biological Process	GO:0003230	cardiac atrium development	0.0438442	0.26212	0	0	5	36
GO:0033363 secretory granule organization	5	0.0438442	0.518	0.139	Biological Process	GO:0033363	secretory granule organization	0.0438442	0.26212	0	0	5	36
GO:1900077 negative regulation of cellular response to insulin stimulus	5	0.0438442	0.518	0.139	Biological Process	GO:1900077	negative regulation of cellular response to insulin stimulus	0.0438442	0.26212	0	0	5	36
GO:0032413 negative regulation of ion transmembrane transporter activity	8	0.0441556	0.829	0.11	Biological Process	GO:0032413	negative regulation of ion transmembrane transporter activity	0.0441556	0.26212	0	0	8	73
GO:0051937 catecholamine transport	8	0.0441556	0.829	0.11	Biological Process	GO:0051937	catecholamine transport	0.0441556	0.26212	0	0	8	73
GO:0072078 nephron tubule morphogenesis	8	0.0441556	0.829	0.11	Biological Process	GO:0072078	nephron tubule morphogenesis	0.0441556	0.26212	0	0	8	73
GO:0006309 apoptotic DNA fragmentation	4	0.0442126	0.415	0.16	Biological Process	GO:0006309	apoptotic DNA fragmentation	0.0442126	0.26212	0	0	4	25
GO:0010884 positive regulation of lipid storage	4	0.0442126	0.415	0.16	Biological Process	GO:0010884	positive regulation of lipid storage	0.0442126	0.26212	0	0	4	25
GO:0043951 negative regulation of cAMP-mediated signaling	4	0.0442126	0.415	0.16	Biological Process	GO:0043951	negative regulation of cAMP-mediated signaling	0.0442126	0.26212	0	0	4	25
GO:0050995 negative regulation of lipid catabolic process	4	0.0442126	0.415	0.16	Biological Process	GO:0050995	negative regulation of lipid catabolic process	0.0442126	0.26212	0	0	4	25
GO:0060561 apoptotic process involved in morphogenesis	4	0.0442126	0.415	0.16	Biological Process	GO:0060561	apoptotic process involved in morphogenesis	0.0442126	0.26212	0	0	4	25
GO:0060669 embryonic placenta morphogenesis	4	0.0442126	0.415	0.16	Biological Process	GO:0060669	embryonic placenta morphogenesis	0.0442126	0.26212	0	0	4	25
GO:0060740 prostate gland epithelium morphogenesis	4	0.0442126	0.415	0.16	Biological Process	GO:0060740	prostate gland epithelium morphogenesis	0.0442126	0.26212	0	0	4	25
GO:0051480 regulation of cytosolic calcium ion concentration	27	0.0443299	2.798	0.077	Biological Process	GO:0051480	regulation of cytosolic calcium ion concentration	0.0443299	0.26212	0	0	27	351
GO:0009409 response to cold	6	0.0446573	0.622	0.125	Biological Process	GO:0009409	response to cold	0.0446573	0.26212	0	0	6	48
GO:0048635 negative regulation of muscle organ development	6	0.0446573	0.622	0.125	Biological Process	GO:0048635	negative regulation of muscle organ development	0.0446573	0.26212	0	0	6	48
GO:1904645 response to amyloid-beta	6	0.0446573	0.622	0.125	Biological Process	GO:1904645	response to amyloid-beta	0.0446573	0.26212	0	0	6	48
GO:1905207 regulation of cardiocyte differentiation	6	0.0446573	0.622	0.125	Biological Process	GO:1905207	regulation of cardiocyte differentiation	0.0446573	0.26212	0	0	6	48
GO:0009214 cyclic nucleotide catabolic process	3	0.0447026	0.311	0.2	Biological Process	GO:0009214	cyclic nucleotide catabolic process	0.0447026	0.26212	0	0	3	15
GO:0021542 dentate gyrus development	3	0.0447026	0.311	0.2	Biological Process	GO:0021542	dentate gyrus development	0.0447026	0.26212	0	0	3	15
GO:0032933 SREBP signaling pathway	3	0.0447026	0.311	0.2	Biological Process	GO:0032933	SREBP signaling pathway	0.0447026	0.26212	0	0	3	15
GO:0035791 platelet-derived growth factor receptor-beta signaling pathway	3	0.0447026	0.311	0.2	Biological Process	GO:0035791	platelet-derived growth factor receptor-beta signaling pathway	0.0447026	0.26212	0	0	3	15
GO:0045064 T-helper 2 cell differentiation	3	0.0447026	0.311	0.2	Biological Process	GO:0045064	T-helper 2 cell differentiation	0.0447026	0.26212	0	0	3	15
GO:0045717 negative regulation of fatty acid biosynthetic process	3	0.0447026	0.311	0.2	Biological Process	GO:0045717	negative regulation of fatty acid biosynthetic process	0.0447026	0.26212	0	0	3	15
GO:0048484 enteric nervous system development	3	0.0447026	0.311	0.2	Biological Process	GO:0048484	enteric nervous system development	0.0447026	0.26212	0	0	3	15
GO:0060413 atrial septum morphogenesis	3	0.0447026	0.311	0.2	Biological Process	GO:0060413	atrial septum morphogenesis	0.0447026	0.26212	0	0	3	15
GO:0070071 proton-transporting two-sector ATPase complex assembly	3	0.0447026	0.311	0.2	Biological Process	GO:0070071	proton-transporting two-sector ATPase complex assembly	0.0447026	0.26212	0	0	3	15
GO:0072075 metanephric mesenchyme development	3	0.0447026	0.311	0.2	Biological Process	GO:0072075	metanephric mesenchyme development	0.0447026	0.26212	0	0	3	15
GO:1901386 negative regulation of voltage-gated calcium channel activity	3	0.0447026	0.311	0.2	Biological Process	GO:1901386	negative regulation of voltage-gated calcium channel activity	0.0447026	0.26212	0	0	3	15
GO:0043405 regulation of MAP kinase activity	26	0.0449997	2.694	0.077	Biological Process	GO:0043405	regulation of MAP kinase activity	0.0449997	0.26212	0	0	26	336
GO:0048592 eye morphogenesis	14	0.0451813	1.451	0.09	Biological Process	GO:0048592	eye morphogenesis	0.0451813	0.26212	0	0	14	156
GO:0097193 intrinsic apoptotic signaling pathway	23	0.045245	2.383	0.079	Biological Process	GO:0097193	intrinsic apoptotic signaling pathway	0.045245	0.26212	0	0	23	290
GO:0042886 amide transport	119	0.0462704	12.332	0.063	Biological Process	GO:0042886	amide transport	0.0462704	0.26212	0	0	119	1887
GO:0010833 telomere maintenance via telomere lengthening	9	0.0465899	0.933	0.103	Biological Process	GO:0010833	telomere maintenance via telomere lengthening	0.0465899	0.26212	0	0	9	87
GO:1900046 regulation of hemostasis	9	0.0465899	0.933	0.103	Biological Process	GO:1900046	regulation of hemostasis	0.0465899	0.26212	0	0	9	87
GO:0070838 divalent metal ion transport	35	0.0467372	3.627	0.073	Biological Process	GO:0070838	divalent metal ion transport	0.0467372	0.26212	0	0	35	479
GO:0031669 cellular response to nutrient levels	22	0.0471519	2.28	0.08	Biological Process	GO:0031669	cellular response to nutrient levels	0.0471519	0.26212	0	0	22	276
GO:0051146 striated muscle cell differentiation	22	0.0471519	2.28	0.08	Biological Process	GO:0051146	striated muscle cell differentiation	0.0471519	0.26212	0	0	22	276
GO:0030902 hindbrain development	14	0.0472375	1.451	0.089	Biological Process	GO:0030902	hindbrain development	0.0472375	0.26212	0	0	14	157
GO:2001236 regulation of extrinsic apoptotic signaling pathway	14	0.0472375	1.451	0.089	Biological Process	GO:2001236	regulation of extrinsic apoptotic signaling pathway	0.0472375	0.26212	0	0	14	157
GO:0048644 muscle organ morphogenesis	8	0.0472535	0.829	0.108	Biological Process	GO:0048644	muscle organ morphogenesis	0.0472535	0.26212	0	0	8	74
GO:0006886 intracellular protein transport	72	0.047435	7.461	0.066	Biological Process	GO:0006886	intracellular protein transport	0.047435	0.26212	0	0	72	1088
GO:0030278 regulation of ossification	17	0.047522	1.762	0.085	Biological Process	GO:0030278	regulation of ossification	0.047522	0.26212	0	0	17	201
GO:1901796 regulation of signal transduction by p53 class mediator	17	0.047522	1.762	0.085	Biological Process	GO:1901796	regulation of signal transduction by p53 class mediator	0.047522	0.26212	0	0	17	201
GO:0043543 protein acylation	20	0.0477302	2.073	0.081	Biological Process	GO:0043543	protein acylation	0.0477302	0.26212	0	0	20	246
GO:0010810 regulation of cell-substrate adhesion	18	0.0477726	1.865	0.083	Biological Process	GO:0010810	regulation of cell-substrate adhesion	0.0477726	0.26212	0	0	18	216
GO:0045639 positive regulation of myeloid cell differentiation	10	0.0479182	1.036	0.099	Biological Process	GO:0045639	positive regulation of myeloid cell differentiation	0.0479182	0.26212	0	0	10	101
GO:1902106 negative regulation of leukocyte differentiation	10	0.0479182	1.036	0.099	Biological Process	GO:1902106	negative regulation of leukocyte differentiation	0.0479182	0.26212	0	0	10	101
GO:0071236 cellular response to antibiotic	13	0.0479802	1.347	0.091	Biological Process	GO:0071236	cellular response to antibiotic	0.0479802	0.26212	0	0	13	143
GO:1990138 neuron projection extension	15	0.0482711	1.554	0.087	Biological Process	GO:1990138	neuron projection extension	0.0482711	0.26212	0	0	15	172
GO:0016202 regulation of striated muscle tissue development	12	0.0484242	1.244	0.093	Biological Process	GO:0016202	regulation of striated muscle tissue development	0.0484242	0.26212	0	0	12	129
GO:1904019 epithelial cell apoptotic process	11	0.048456	1.14	0.096	Biological Process	GO:1904019	epithelial cell apoptotic process	0.048456	0.26212	0	0	11	115
GO:0001953 negative regulation of cell-matrix adhesion	5	0.0485154	0.518	0.135	Biological Process	GO:0001953	negative regulation of cell-matrix adhesion	0.0485154	0.26212	0	0	5	37
GO:0043516 regulation of DNA damage response, signal transduction by p53 class mediator	5	0.0485154	0.518	0.135	Biological Process	GO:0043516	regulation of DNA damage response, signal transduction by p53 class mediator	0.0485154	0.26212	0	0	5	37
GO:0060428 lung epithelium development	5	0.0485154	0.518	0.135	Biological Process	GO:0060428	lung epithelium development	0.0485154	0.26212	0	0	5	37
GO:0090218 positive regulation of lipid kinase activity	5	0.0485154	0.518	0.135	Biological Process	GO:0090218	positive regulation of lipid kinase activity	0.0485154	0.26212	0	0	5	37
GO:0010718 positive regulation of epithelial to mesenchymal transition	6	0.0486467	0.622	0.122	Biological Process	GO:0010718	positive regulation of epithelial to mesenchymal transition	0.0486467	0.26212	0	0	6	49
GO:0014075 response to amine	6	0.0486467	0.622	0.122	Biological Process	GO:0014075	response to amine	0.0486467	0.26212	0	0	6	49
GO:0044088 regulation of vacuole organization	6	0.0486467	0.622	0.122	Biological Process	GO:0044088	regulation of vacuole organization	0.0486467	0.26212	0	0	6	49
GO:0071349 cellular response to interleukin-12	6	0.0486467	0.622	0.122	Biological Process	GO:0071349	cellular response to interleukin-12	0.0486467	0.26212	0	0	6	49
GO:1901862 negative regulation of muscle tissue development	6	0.0486467	0.622	0.122	Biological Process	GO:1901862	negative regulation of muscle tissue development	0.0486467	0.26212	0	0	6	49
GO:0000278 mitotic cell cycle	71	0.0488301	7.358	0.066	Biological Process	GO:0000278	mitotic cell cycle	0.0488301	0.26212	0	0	71	1073
GO:0045786 negative regulation of cell cycle	43	0.0491356	4.456	0.07	Biological Process	GO:0045786	negative regulation of cell cycle	0.0491356	0.26212	0	0	43	610
GO:0046578 regulation of Ras protein signal transduction	17	0.0493832	1.762	0.084	Biological Process	GO:0046578	regulation of Ras protein signal transduction	0.0493832	0.26212	0	0	17	202
GO:0042221 response to chemical	283	0.049729	29.326	0.059	Biological Process	GO:0042221	response to chemical	0.049729	0.26212	0	0	283	4786
GO:0043231 intracellular membrane-bounded organelle	701	2.45393e-10	70.1	0.062	Cellular Component	GO:0043231	intracellular membrane-bounded organelle	2.45393e-10	2.29688e-07	0	0	701	11307
GO:0000785 chromatin	117	8.09662e-10	11.7	0.095	Cellular Component	GO:0000785	chromatin	8.09662e-10	3.78922e-07	0	0	117	1230
GO:0044424 intracellular part	865	7.25963e-09	86.5	0.058	Cellular Component	GO:0044424	intracellular part	7.25963e-09	1.7402e-06	0	0	865	14816
GO:0005622 intracellular	865	7.43676e-09	86.5	0.058	Cellular Component	GO:0005622	intracellular	7.43676e-09	1.7402e-06	0	0	865	14817
GO:0043227 membrane-bounded organelle	762	4.57605e-08	76.2	0.06	Cellular Component	GO:0043227	membrane-bounded organelle	4.57605e-08	8.56637e-06	0	0	762	12764
GO:0044427 chromosomal part	134	3.812e-07	13.4	0.082	Cellular Component	GO:0044427	chromosomal part	3.812e-07	5.5153e-05	0	0	134	1631
GO:0044446 intracellular organelle part	618	4.12469e-07	61.8	0.061	Cellular Component	GO:0044446	intracellular organelle part	4.12469e-07	5.5153e-05	0	0	618	10077
GO:0043229 intracellular organelle	771	9.35508e-07	77.1	0.059	Cellular Component	GO:0043229	intracellular organelle	9.35508e-07	0.000109454	0	0	771	13100
GO:0005694 chromosome	143	1.08942e-06	14.3	0.079	Cellular Component	GO:0005694	chromosome	1.08942e-06	0.0001133	0	0	143	1802
GO:0044422 organelle part	626	5.47427e-06	62.6	0.06	Cellular Component	GO:0044422	organelle part	5.47427e-06	0.000512392	0	0	626	10381
GO:0005654 nucleoplasm	279	9.66289e-06	27.9	0.067	Cellular Component	GO:0005654	nucleoplasm	9.66289e-06	0.000822224	0	0	279	4134
GO:0005634 nucleus	474	1.08525e-05	47.4	0.062	Cellular Component	GO:0005634	nucleus	1.08525e-05	0.000846494	0	0	474	7597
GO:0012505 endomembrane system	308	1.31363e-05	30.8	0.066	Cellular Component	GO:0012505	endomembrane system	1.31363e-05	0.000945815	0	0	308	4651
GO:0043226 organelle	800	3.70827e-05	80	0.058	Cellular Component	GO:0043226	organelle	3.70827e-05	0.00247924	0	0	800	13892
GO:0031981 nuclear lumen	295	4.12162e-05	29.5	0.066	Cellular Component	GO:0031981	nuclear lumen	4.12162e-05	0.00257189	0	0	295	4489
GO:0031984 organelle subcompartment	132	5.28078e-05	13.2	0.075	Cellular Component	GO:0031984	organelle subcompartment	5.28078e-05	0.00308926	0	0	132	1764
GO:1990234 transferase complex	69	5.9177e-05	6.9	0.087	Cellular Component	GO:1990234	transferase complex	5.9177e-05	0.00325821	0	0	69	795
GO:0044428 nuclear part	314	8.95557e-05	31.4	0.065	Cellular Component	GO:0044428	nuclear part	8.95557e-05	0.00460659	0	0	314	4867
GO:0005667 transcription factor complex	38	9.35099e-05	3.8	0.103	Cellular Component	GO:0005667	transcription factor complex	9.35099e-05	0.00460659	0	0	38	368
GO:0097134 cyclin E1-CDK2 complex	3	0.000155489	0.3	1	Cellular Component	GO:0097134	cyclin E1-CDK2 complex	0.000155489	0.00727688	0	0	3	3
GO:0061695 transferase complex, transferring phosphorus-containing groups	29	0.000246204	2.9	0.109	Cellular Component	GO:0061695	transferase complex, transferring phosphorus-containing groups	0.000246204	0.0109737	0	0	29	266
GO:0005623 cell	945	0.00037677	94.5	0.055	Cellular Component	GO:0005623	cell	0.00037677	0.014721	0	0	945	17043
GO:0044464 cell part	945	0.00037677	94.5	0.055	Cellular Component	GO:0044464	cell part	0.00037677	0.014721	0	0	945	17043
GO:0044297 cell body	52	0.0003858	5.2	0.088	Cellular Component	GO:0044297	cell body	0.0003858	0.014721	0	0	52	594
GO:0000307 cyclin-dependent protein kinase holoenzyme complex	9	0.000393188	0.9	0.209	Cellular Component	GO:0000307	cyclin-dependent protein kinase holoenzyme complex	0.000393188	0.014721	0	0	9	43
GO:1902494 catalytic complex	105	0.000701641	10.5	0.073	Cellular Component	GO:1902494	catalytic complex	0.000701641	0.0252591	0	0	105	1434
GO:0010494 cytoplasmic stress granule	12	0.000798372	1.2	0.156	Cellular Component	GO:0010494	cytoplasmic stress granule	0.000798372	0.027641	0	0	12	77
GO:1902554 serine/threonine protein kinase complex	13	0.000826866	1.3	0.148	Cellular Component	GO:1902554	serine/threonine protein kinase complex	0.000826866	0.027641	0	0	13	88
GO:0031234 extrinsic component of cytoplasmic side of plasma membrane	14	0.00122765	1.4	0.136	Cellular Component	GO:0031234	extrinsic component of cytoplasmic side of plasma membrane	0.00122765	0.0396234	0	0	14	103
GO:1902911 protein kinase complex	14	0.00134992	1.4	0.135	Cellular Component	GO:1902911	protein kinase complex	0.00134992	0.0418415	0	0	14	104
GO:0090575 RNA polymerase II transcription factor complex	20	0.00138578	2	0.113	Cellular Component	GO:0090575	RNA polymerase II transcription factor complex	0.00138578	0.0418415	0	0	20	177
GO:0031974 membrane-enclosed lumen	345	0.00152542	34.5	0.061	Cellular Component	GO:0031974	membrane-enclosed lumen	0.00152542	0.0419938	0	0	345	5615
GO:0043233 organelle lumen	345	0.00152542	34.5	0.061	Cellular Component	GO:0043233	organelle lumen	0.00152542	0.0419938	0	0	345	5615
GO:0070013 intracellular organelle lumen	345	0.00152542	34.5	0.061	Cellular Component	GO:0070013	intracellular organelle lumen	0.00152542	0.0419938	0	0	345	5615
GO:0097458 neuron part	126	0.00183053	12.6	0.069	Cellular Component	GO:0097458	neuron part	0.00183053	0.0484151	0	0	126	1822
GO:0098827 endoplasmic reticulum subcompartment	84	0.00186212	8.4	0.074	Cellular Component	GO:0098827	endoplasmic reticulum subcompartment	0.00186212	0.0484151	0	0	84	1137
GO:0043025 neuronal cell body	44	0.00220074	4.4	0.084	Cellular Component	GO:0043025	neuronal cell body	0.00220074	0.055524	0	0	44	522
GO:0030054 cell junction	99	0.00227619	9.9	0.071	Cellular Component	GO:0030054	cell junction	0.00227619	0.055524	0	0	99	1388
GO:0005737 cytoplasm	685	0.00236714	68.5	0.057	Cellular Component	GO:0005737	cytoplasm	0.00236714	0.055524	0	0	685	11950
GO:0005789 endoplasmic reticulum membrane	83	0.00243663	8.3	0.073	Cellular Component	GO:0005789	endoplasmic reticulum membrane	0.00243663	0.055524	0	0	83	1132
GO:0044451 nucleoplasm part	86	0.00248023	8.6	0.073	Cellular Component	GO:0044451	nucleoplasm part	0.00248023	0.055524	0	0	86	1181
GO:0016604 nuclear body	63	0.00249146	6.3	0.077	Cellular Component	GO:0016604	nuclear body	0.00249146	0.055524	0	0	63	816
GO:0002945 cyclin K-CDK13 complex	2	0.0028943	0.2	1	Cellular Component	GO:0002945	cyclin K-CDK13 complex	0.0028943	0.0602873	0	0	2	2
GO:0097135 cyclin E2-CDK2 complex	2	0.0028943	0.2	1	Cellular Component	GO:0097135	cyclin E2-CDK2 complex	0.0028943	0.0602873	0	0	2	2
GO:0031252 cell leading edge	37	0.00289843	3.7	0.087	Cellular Component	GO:0031252	cell leading edge	0.00289843	0.0602873	0	0	37	426
GO:0030125 clathrin vesicle coat	6	0.00325069	0.6	0.214	Cellular Component	GO:0030125	clathrin vesicle coat	0.00325069	0.0661445	0	0	6	28
GO:0019898 extrinsic component of membrane	29	0.00347731	2.9	0.092	Cellular Component	GO:0019898	extrinsic component of membrane	0.00347731	0.0692502	0	0	29	315
GO:0044798 nuclear transcription factor complex	20	0.00384257	2	0.104	Cellular Component	GO:0044798	nuclear transcription factor complex	0.00384257	0.0749301	0	0	20	193
GO:0042175 nuclear outer membrane-endoplasmic reticulum membrane network	83	0.00407167	8.3	0.072	Cellular Component	GO:0042175	nuclear outer membrane-endoplasmic reticulum membrane network	0.00407167	0.0777773	0	0	83	1154
GO:0044444 cytoplasmic part	584	0.00422931	58.4	0.058	Cellular Component	GO:0044444	cytoplasmic part	0.00422931	0.0791726	0	0	584	10093
GO:0005829 cytosol	326	0.00432079	32.6	0.061	Cellular Component	GO:0005829	cytosol	0.00432079	0.0792993	0	0	326	5361
GO:0005905 clathrin-coated pit	10	0.00502863	1	0.139	Cellular Component	GO:0005905	clathrin-coated pit	0.00502863	0.0905153	0	0	10	72
GO:0098982 GABA-ergic synapse	10	0.00555295	1	0.137	Cellular Component	GO:0098982	GABA-ergic synapse	0.00555295	0.0980672	0	0	10	73
GO:0044432 endoplasmic reticulum part	98	0.0058417	9.8	0.069	Cellular Component	GO:0044432	endoplasmic reticulum part	0.0058417	0.0995678	0	0	98	1417
GO:0043005 neuron projection	96	0.00585067	9.6	0.069	Cellular Component	GO:0043005	neuron projection	0.00585067	0.0995678	0	0	96	1384
GO:0005773 vacuole	61	0.00615123	6.1	0.075	Cellular Component	GO:0005773	vacuole	0.00615123	0.102119	0	0	61	818
GO:0030424 axon	51	0.00621881	5.1	0.077	Cellular Component	GO:0030424	axon	0.00621881	0.102119	0	0	51	661
GO:0005794 Golgi apparatus	108	0.00699462	10.8	0.068	Cellular Component	GO:0005794	Golgi apparatus	0.00699462	0.110739	0	0	108	1593
GO:0005925 focal adhesion	35	0.00701801	3.5	0.083	Cellular Component	GO:0005925	focal adhesion	0.00701801	0.110739	0	0	35	420
GO:0008024 cyclin/CDK positive transcription elongation factor complex	3	0.00709865	0.3	0.375	Cellular Component	GO:0008024	cyclin/CDK positive transcription elongation factor complex	0.00709865	0.110739	0	0	3	8
GO:0005924 cell-substrate adherens junction	35	0.00753404	3.5	0.083	Cellular Component	GO:0005924	cell-substrate adherens junction	0.00753404	0.115604	0	0	35	422
GO:0098793 presynapse	41	0.0080529	4.1	0.08	Cellular Component	GO:0098793	presynapse	0.0080529	0.11902	0	0	41	515
GO:0005945 6-phosphofructokinase complex	2	0.00837194	0.2	0.667	Cellular Component	GO:0005945	6-phosphofructokinase complex	0.00837194	0.11902	0	0	2	3
GO:0032444 activin responsive factor complex	2	0.00837194	0.2	0.667	Cellular Component	GO:0032444	activin responsive factor complex	0.00837194	0.11902	0	0	2	3
GO:0033267 axon part	34	0.00837387	3.4	0.083	Cellular Component	GO:0033267	axon part	0.00837387	0.11902	0	0	34	410
GO:0044456 synapse part	70	0.00851152	7	0.072	Cellular Component	GO:0044456	synapse part	0.00851152	0.11902	0	0	70	976
GO:0030425 dendrite	49	0.00854117	4.9	0.076	Cellular Component	GO:0030425	dendrite	0.00854117	0.11902	0	0	49	641
GO:0030120 vesicle coat	8	0.00879508	0.8	0.145	Cellular Component	GO:0030120	vesicle coat	0.00879508	0.11902	0	0	8	55
GO:0030055 cell-substrate junction	35	0.00896387	3.5	0.082	Cellular Component	GO:0030055	cell-substrate junction	0.00896387	0.11902	0	0	35	427
GO:0035098 ESC/E(Z) complex	4	0.00902486	0.4	0.25	Cellular Component	GO:0035098	ESC/E(Z) complex	0.00902486	0.11902	0	0	4	16
GO:0097447 dendritic tree	49	0.00902826	4.9	0.076	Cellular Component	GO:0097447	dendritic tree	0.00902826	0.11902	0	0	49	643
GO:0000323 lytic vacuole	54	0.00930497	5.4	0.075	Cellular Component	GO:0000323	lytic vacuole	0.00930497	0.119308	0	0	54	723
GO:0005764 lysosome	54	0.00930497	5.4	0.075	Cellular Component	GO:0005764	lysosome	0.00930497	0.119308	0	0	54	723
GO:0032991 protein-containing complex	338	0.00958155	33.8	0.06	Cellular Component	GO:0032991	protein-containing complex	0.00958155	0.121194	0	0	338	5650
GO:0009898 cytoplasmic side of plasma membrane	17	0.00974923	1.7	0.101	Cellular Component	GO:0009898	cytoplasmic side of plasma membrane	0.00974923	0.12167	0	0	17	169
GO:0071782 endoplasmic reticulum tubular network	5	0.0114342	0.5	0.192	Cellular Component	GO:0071782	endoplasmic reticulum tubular network	0.0114342	0.139985	0	0	5	26
GO:0005834 heterotrimeric G-protein complex	6	0.0116654	0.6	0.167	Cellular Component	GO:0005834	heterotrimeric G-protein complex	0.0116654	0.139985	0	0	6	36
GO:1905360 GTPase complex	6	0.0116654	0.6	0.167	Cellular Component	GO:1905360	GTPase complex	0.0116654	0.139985	0	0	6	36
GO:0031519 PcG protein complex	7	0.0122496	0.7	0.149	Cellular Component	GO:0031519	PcG protein complex	0.0122496	0.145135	0	0	7	47
GO:0033162 melanosome membrane	4	0.0139299	0.4	0.222	Cellular Component	GO:0033162	melanosome membrane	0.0139299	0.156911	0	0	4	18
GO:0045009 chitosome	4	0.0139299	0.4	0.222	Cellular Component	GO:0045009	chitosome	0.0139299	0.156911	0	0	4	18
GO:0090741 pigment granule membrane	4	0.0139299	0.4	0.222	Cellular Component	GO:0090741	pigment granule membrane	0.0139299	0.156911	0	0	4	18
GO:0071986 Ragulator complex	3	0.0140296	0.3	0.3	Cellular Component	GO:0071986	Ragulator complex	0.0140296	0.156911	0	0	3	10
GO:0042470 melanosome	12	0.0142494	1.2	0.11	Cellular Component	GO:0042470	melanosome	0.0142494	0.156911	0	0	12	109
GO:0048770 pigment granule	12	0.0142494	1.2	0.11	Cellular Component	GO:0048770	pigment granule	0.0142494	0.156911	0	0	12	109
GO:0030427 site of polarized growth	18	0.0149996	1.8	0.094	Cellular Component	GO:0030427	site of polarized growth	0.0149996	0.163251	0	0	18	191
GO:0150034 distal axon	26	0.0151974	2.6	0.085	Cellular Component	GO:0150034	distal axon	0.0151974	0.163503	0	0	26	307
GO:0036477 somatodendritic compartment	62	0.0158167	6.2	0.071	Cellular Component	GO:0036477	somatodendritic compartment	0.0158167	0.167928	0	0	62	874
GO:0032777 Piccolo NuA4 histone acetyltransferase complex	2	0.016147	0.2	0.5	Cellular Component	GO:0032777	Piccolo NuA4 histone acetyltransferase complex	0.016147	0.167928	0	0	2	4
GO:0042567 insulin-like growth factor ternary complex	2	0.016147	0.2	0.5	Cellular Component	GO:0042567	insulin-like growth factor ternary complex	0.016147	0.167928	0	0	2	4
GO:0098791 Golgi subcompartment	60	0.0170985	6	0.071	Cellular Component	GO:0098791	Golgi subcompartment	0.0170985	0.17587	0	0	60	845
GO:0005768 endosome	69	0.0173205	6.9	0.069	Cellular Component	GO:0005768	endosome	0.0173205	0.176218	0	0	69	993
GO:0005942 phosphatidylinositol 3-kinase complex	5	0.0180791	0.5	0.172	Cellular Component	GO:0005942	phosphatidylinositol 3-kinase complex	0.0180791	0.181958	0	0	5	29
GO:0000792 heterochromatin	9	0.0189788	0.9	0.12	Cellular Component	GO:0000792	heterochromatin	0.0189788	0.188981	0	0	9	75
GO:0019005 SCF ubiquitin ligase complex	8	0.0192337	0.8	0.127	Cellular Component	GO:0019005	SCF ubiquitin ligase complex	0.0192337	0.189503	0	0	8	63
GO:0032806 carboxy-terminal domain protein kinase complex	4	0.0202552	0.4	0.2	Cellular Component	GO:0032806	carboxy-terminal domain protein kinase complex	0.0202552	0.195452	0	0	4	20
GO:0044233 Mitochondria-associated ER Membrane	4	0.0202552	0.4	0.2	Cellular Component	GO:0044233	Mitochondria-associated ER Membrane	0.0202552	0.195452	0	0	4	20
GO:0030426 growth cone	17	0.0221268	1.7	0.092	Cellular Component	GO:0030426	growth cone	0.0221268	0.209735	0	0	17	185
GO:0048786 presynaptic active zone	9	0.0221836	0.9	0.117	Cellular Component	GO:0048786	presynaptic active zone	0.0221836	0.209735	0	0	9	77
GO:0044295 axonal growth cone	5	0.0236874	0.5	0.161	Cellular Component	GO:0044295	axonal growth cone	0.0236874	0.217797	0	0	5	31
GO:0048787 presynaptic active zone membrane	5	0.0236874	0.5	0.161	Cellular Component	GO:0048787	presynaptic active zone membrane	0.0236874	0.217797	0	0	5	31
GO:0019908 nuclear cyclin-dependent protein kinase holoenzyme complex	3	0.0237342	0.3	0.25	Cellular Component	GO:0019908	nuclear cyclin-dependent protein kinase holoenzyme complex	0.0237342	0.217797	0	0	3	12
GO:0005783 endoplasmic reticulum	127	0.024207	12.7	0.064	Cellular Component	GO:0005783	endoplasmic reticulum	0.024207	0.219978	0	0	127	1995
GO:0043228 non-membrane-bounded organelle	302	0.0246862	30.2	0.059	Cellular Component	GO:0043228	non-membrane-bounded organelle	0.0246862	0.221106	0	0	302	5097
GO:0031093 platelet alpha granule lumen	8	0.0248035	0.8	0.121	Cellular Component	GO:0031093	platelet alpha granule lumen	0.0248035	0.221106	0	0	8	66
GO:0043204 perikaryon	15	0.0259223	1.5	0.094	Cellular Component	GO:0043204	perikaryon	0.0259223	0.222894	0	0	15	160
GO:0016942 insulin-like growth factor binding protein complex	2	0.0259567	0.2	0.4	Cellular Component	GO:0016942	insulin-like growth factor binding protein complex	0.0259567	0.222894	0	0	2	5
GO:0036454 growth factor complex	2	0.0259567	0.2	0.4	Cellular Component	GO:0036454	growth factor complex	0.0259567	0.222894	0	0	2	5
GO:0090724 central region of growth cone	2	0.0259567	0.2	0.4	Cellular Component	GO:0090724	central region of growth cone	0.0259567	0.222894	0	0	2	5
GO:0043232 intracellular non-membrane-bounded organelle	301	0.0270828	30.1	0.059	Cellular Component	GO:0043232	intracellular non-membrane-bounded organelle	0.0270828	0.23045	0	0	301	5089
GO:0098588 bounding membrane of organelle	137	0.0275646	13.7	0.063	Cellular Component	GO:0098588	bounding membrane of organelle	0.0275646	0.232436	0	0	137	2178
GO:0044431 Golgi apparatus part	66	0.0280056	6.6	0.068	Cellular Component	GO:0044431	Golgi apparatus part	0.0280056	0.234047	0	0	66	968
GO:0042734 presynaptic membrane	14	0.0287066	1.4	0.095	Cellular Component	GO:0042734	presynaptic membrane	0.0287066	0.237782	0	0	14	148
GO:0030140 trans-Golgi network transport vesicle	5	0.0303083	0.5	0.152	Cellular Component	GO:0030140	trans-Golgi network transport vesicle	0.0303083	0.248847	0	0	5	33
GO:0019897 extrinsic component of plasma membrane	16	0.0309257	1.6	0.09	Cellular Component	GO:0019897	extrinsic component of plasma membrane	0.0309257	0.251708	0	0	16	178
GO:0044433 cytoplasmic vesicle part	100	0.0312998	10	0.065	Cellular Component	GO:0044433	cytoplasmic vesicle part	0.0312998	0.252557	0	0	100	1549
GO:0030136 clathrin-coated vesicle	17	0.0330166	1.7	0.088	Cellular Component	GO:0030136	clathrin-coated vesicle	0.0330166	0.26257	0	0	17	194
GO:0045202 synapse	88	0.0331156	8.8	0.065	Cellular Component	GO:0045202	synapse	0.0331156	0.26257	0	0	88	1348
GO:0000151 ubiquitin ligase complex	24	0.0333823	2.4	0.08	Cellular Component	GO:0000151	ubiquitin ligase complex	0.0333823	0.26257	0	0	24	299
GO:0098562 cytoplasmic side of membrane	17	0.0344342	1.7	0.087	Cellular Component	GO:0098562	cytoplasmic side of membrane	0.0344342	0.268587	0	0	17	195
GO:0030117 membrane coat	10	0.0357585	1	0.103	Cellular Component	GO:0030117	membrane coat	0.0357585	0.274344	0	0	10	97
GO:0048475 coated membrane	10	0.0357585	1	0.103	Cellular Component	GO:0048475	coated membrane	0.0357585	0.274344	0	0	10	97
GO:0005672 transcription factor TFIIA complex	2	0.0375599	0.2	0.333	Cellular Component	GO:0005672	transcription factor TFIIA complex	0.0375599	0.285822	0	0	2	6
GO:0005912 adherens junction	40	0.0380909	4	0.072	Cellular Component	GO:0005912	adherens junction	0.0380909	0.287525	0	0	40	556
GO:0030118 clathrin coat	6	0.0391716	0.6	0.128	Cellular Component	GO:0030118	clathrin coat	0.0391716	0.292679	0	0	6	47
GO:0030139 endocytic vesicle	26	0.0393991	2.6	0.078	Cellular Component	GO:0030139	endocytic vesicle	0.0393991	0.292679	0	0	26	335
GO:0032587 ruffle membrane	10	0.0403023	1	0.101	Cellular Component	GO:0032587	ruffle membrane	0.0403023	0.295454	0	0	10	99
GO:0030659 cytoplasmic vesicle membrane	54	0.0404039	5.4	0.069	Cellular Component	GO:0030659	cytoplasmic vesicle membrane	0.0404039	0.295454	0	0	54	788
GO:0000139 Golgi membrane	50	0.0430061	5	0.069	Cellular Component	GO:0000139	Golgi membrane	0.0430061	0.311239	0	0	50	725
GO:0030665 clathrin-coated vesicle membrane	11	0.0432276	1.1	0.096	Cellular Component	GO:0030665	clathrin-coated vesicle membrane	0.0432276	0.311239	0	0	11	114
GO:0098978 glutamatergic synapse	27	0.0435795	2.7	0.076	Cellular Component	GO:0098978	glutamatergic synapse	0.0435795	0.311377	0	0	27	354
GO:0012506 vesicle membrane	55	0.0448088	5.5	0.068	Cellular Component	GO:0012506	vesicle membrane	0.0448088	0.317735	0	0	55	810
GO:0098636 protein complex involved in cell adhesion	5	0.0467511	0.5	0.135	Cellular Component	GO:0098636	protein complex involved in cell adhesion	0.0467511	0.327139	0	0	5	37
GO:0030670 phagocytic vesicle membrane	8	0.0480289	0.8	0.107	Cellular Component	GO:0030670	phagocytic vesicle membrane	0.0480289	0.327139	0	0	8	75
GO:1990837 sequence-specific double-stranded DNA binding	136	1.95972e-08	13.586	0.087	Molecular Function	GO:1990837	sequence-specific double-stranded DNA binding	1.95972e-08	2.19312e-05	0	0	136	1564
GO:0043565 sequence-specific DNA binding	142	3.07806e-08	14.186	0.085	Molecular Function	GO:0043565	sequence-specific DNA binding	3.07806e-08	2.19312e-05	0	0	142	1665
GO:0003690 double-stranded DNA binding	139	1.19104e-07	13.886	0.084	Molecular Function	GO:0003690	double-stranded DNA binding	1.19104e-07	5.65746e-05	0	0	139	1657
GO:0001228 DNA-binding transcription activator activity, RNA polymerase II-specific	52	1.76336e-07	5.195	0.117	Molecular Function	GO:0001228	DNA-binding transcription activator activity, RNA polymerase II-specific	1.76336e-07	6.28198e-05	0	0	52	446
GO:0001067 regulatory region nucleic acid binding	126	4.87892e-07	12.587	0.084	Molecular Function	GO:0001067	regulatory region nucleic acid binding	4.87892e-07	0.000139049	0	0	126	1501
GO:0000987 proximal promoter sequence-specific DNA binding	105	6.98222e-07	10.49	0.088	Molecular Function	GO:0000987	proximal promoter sequence-specific DNA binding	6.98222e-07	0.000165828	0	0	105	1199
GO:0000977 RNA polymerase II regulatory region sequence-specific DNA binding	118	9.95076e-07	11.788	0.084	Molecular Function	GO:0000977	RNA polymerase II regulatory region sequence-specific DNA binding	9.95076e-07	0.000177248	0	0	118	1401
GO:0001012 RNA polymerase II regulatory region DNA binding	118	9.95076e-07	11.788	0.084	Molecular Function	GO:0001012	RNA polymerase II regulatory region DNA binding	9.95076e-07	0.000177248	0	0	118	1401
GO:0000976 transcription regulatory region sequence-specific DNA binding	124	1.17498e-06	12.388	0.083	Molecular Function	GO:0000976	transcription regulatory region sequence-specific DNA binding	1.17498e-06	0.000185564	0	0	124	1496
GO:0044212 transcription regulatory region DNA binding	124	1.3022e-06	12.388	0.083	Molecular Function	GO:0044212	transcription regulatory region DNA binding	1.3022e-06	0.000185564	0	0	124	1499
GO:0003700 DNA-binding transcription factor activity	118	1.87425e-06	11.788	0.083	Molecular Function	GO:0003700	DNA-binding transcription factor activity	1.87425e-06	0.000195746	0	0	118	1419
GO:0008134 transcription factor binding	66	1.97691e-06	6.593	0.099	Molecular Function	GO:0008134	transcription factor binding	1.97691e-06	0.000195746	0	0	66	669
GO:0000981 DNA-binding transcription factor activity, RNA polymerase II-specific	114	2.02028e-06	11.389	0.084	Molecular Function	GO:0000981	DNA-binding transcription factor activity, RNA polymerase II-specific	2.02028e-06	0.000195746	0	0	114	1361
GO:0005515 protein binding	859	2.02113e-06	85.814	0.058	Molecular Function	GO:0005515	protein binding	2.02113e-06	0.000195746	0	0	859	14787
GO:0005488 binding	953	2.06048e-06	95.205	0.057	Molecular Function	GO:0005488	binding	2.06048e-06	0.000195746	0	0	953	16838
GO:0140110 transcription regulator activity	152	2.49327e-06	15.185	0.078	Molecular Function	GO:0140110	transcription regulator activity	2.49327e-06	0.000213303	0	0	152	1951
GO:0019899 enzyme binding	168	2.54467e-06	16.783	0.076	Molecular Function	GO:0019899	enzyme binding	2.54467e-06	0.000213303	0	0	168	2204
GO:0000978 RNA polymerase II proximal promoter sequence-specific DNA binding	101	3.71562e-06	10.09	0.085	Molecular Function	GO:0000978	RNA polymerase II proximal promoter sequence-specific DNA binding	3.71562e-06	0.000294153	0	0	101	1184
GO:0019900 kinase binding	71	6.17473e-06	7.093	0.093	Molecular Function	GO:0019900	kinase binding	6.17473e-06	0.000463105	0	0	71	762
GO:0003677 DNA binding	181	1.68749e-05	18.082	0.073	Molecular Function	GO:0003677	DNA binding	1.68749e-05	0.00120233	0	0	181	2487
GO:0019003 GDP binding	14	3.29805e-05	1.399	0.192	Molecular Function	GO:0019003	GDP binding	3.29805e-05	0.00223796	0	0	14	73
GO:0005338 nucleotide-sugar transmembrane transporter activity	6	5.244e-05	0.599	0.429	Molecular Function	GO:0005338	nucleotide-sugar transmembrane transporter activity	5.244e-05	0.00339668	0	0	6	14
GO:0015020 glucuronosyltransferase activity	9	6.12408e-05	0.899	0.265	Molecular Function	GO:0015020	glucuronosyltransferase activity	6.12408e-05	0.00379427	0	0	9	34
GO:0019901 protein kinase binding	61	7.36894e-05	6.094	0.09	Molecular Function	GO:0019901	protein kinase binding	7.36894e-05	0.00437531	0	0	61	677
GO:0001883 purine nucleoside binding	40	7.97964e-05	3.996	0.103	Molecular Function	GO:0001883	purine nucleoside binding	7.97964e-05	0.0045484	0	0	40	388
GO:0019787 ubiquitin-like protein transferase activity	45	9.23942e-05	4.496	0.098	Molecular Function	GO:0019787	ubiquitin-like protein transferase activity	9.23942e-05	0.00506391	0	0	45	458
GO:0005525 GTP binding	39	0.000113451	3.896	0.102	Molecular Function	GO:0005525	GTP binding	0.000113451	0.0057753	0	0	39	381
GO:0004842 ubiquitin-protein transferase activity	43	0.000114641	4.296	0.099	Molecular Function	GO:0004842	ubiquitin-protein transferase activity	0.000114641	0.0057753	0	0	43	435
GO:0001882 nucleoside binding	40	0.000117532	3.996	0.101	Molecular Function	GO:0001882	nucleoside binding	0.000117532	0.0057753	0	0	40	395
GO:0032550 purine ribonucleoside binding	39	0.000141349	3.896	0.101	Molecular Function	GO:0032550	purine ribonucleoside binding	0.000141349	0.00650429	0	0	39	385
GO:0061630 ubiquitin protein ligase activity	33	0.000141497	3.297	0.108	Molecular Function	GO:0061630	ubiquitin protein ligase activity	0.000141497	0.00650429	0	0	33	306
GO:0016740 transferase activity	166	0.000160022	16.583	0.071	Molecular Function	GO:0016740	transferase activity	0.000160022	0.00712596	0	0	166	2342
GO:0019001 guanyl nucleotide binding	40	0.000170738	3.996	0.1	Molecular Function	GO:0019001	guanyl nucleotide binding	0.000170738	0.007137	0	0	40	402
GO:0032561 guanyl ribonucleotide binding	40	0.000170738	3.996	0.1	Molecular Function	GO:0032561	guanyl ribonucleotide binding	0.000170738	0.007137	0	0	40	402
GO:0032549 ribonucleoside binding	39	0.000175295	3.896	0.1	Molecular Function	GO:0032549	ribonucleoside binding	0.000175295	0.007137	0	0	39	389
GO:0046965 retinoid X receptor binding	6	0.000187686	0.599	0.353	Molecular Function	GO:0046965	retinoid X receptor binding	0.000187686	0.00742924	0	0	6	17
GO:0019904 protein domain specific binding	61	0.000233474	6.094	0.086	Molecular Function	GO:0019904	protein domain specific binding	0.000233474	0.0089919	0	0	61	706
GO:0015165 pyrimidine nucleotide-sugar transmembrane transporter activity	5	0.000270411	0.5	0.417	Molecular Function	GO:0015165	pyrimidine nucleotide-sugar transmembrane transporter activity	0.000270411	0.00997183	0	0	5	12
GO:0061659 ubiquitin-like protein ligase activity	33	0.000272913	3.297	0.104	Molecular Function	GO:0061659	ubiquitin-like protein ligase activity	0.000272913	0.00997183	0	0	33	317
GO:0046983 protein dimerization activity	85	0.000288273	8.492	0.079	Molecular Function	GO:0046983	protein dimerization activity	0.000288273	0.0102697	0	0	85	1073
GO:0097159 organic cyclic compound binding	376	0.000578167	37.562	0.062	Molecular Function	GO:0097159	organic cyclic compound binding	0.000578167	0.0200948	0	0	376	6034
GO:0070851 growth factor receptor binding	18	0.000701696	1.798	0.127	Molecular Function	GO:0070851	growth factor receptor binding	0.000701696	0.0238075	0	0	18	142
GO:0042803 protein homodimerization activity	57	0.000749322	5.694	0.084	Molecular Function	GO:0042803	protein homodimerization activity	0.000749322	0.0248322	0	0	57	679
GO:0016538 cyclin-dependent protein serine/threonine kinase regulator activity	9	0.000842542	0.899	0.191	Molecular Function	GO:0016538	cyclin-dependent protein serine/threonine kinase regulator activity	0.000842542	0.0272869	0	0	9	47
GO:0042802 identical protein binding	144	0.000881248	14.386	0.07	Molecular Function	GO:0042802	identical protein binding	0.000881248	0.0279062	0	0	144	2063
GO:0008194 UDP-glycosyltransferase activity	18	0.00105557	1.798	0.122	Molecular Function	GO:0008194	UDP-glycosyltransferase activity	0.00105557	0.0326998	0	0	18	147
GO:1901363 heterocyclic compound binding	368	0.00128515	36.763	0.062	Molecular Function	GO:1901363	heterocyclic compound binding	0.00128515	0.0389648	0	0	368	5953
GO:0038191 neuropilin binding	3	0.00147584	0.3	0.6	Molecular Function	GO:0038191	neuropilin binding	0.00147584	0.043814	0	0	3	5
GO:0019207 kinase regulator activity	23	0.00194071	2.298	0.105	Molecular Function	GO:0019207	kinase regulator activity	0.00194071	0.0564391	0	0	23	219
GO:0051020 GTPase binding	41	0.0020525	4.096	0.087	Molecular Function	GO:0051020	GTPase binding	0.0020525	0.0584964	0	0	41	471
GO:0140096 catalytic activity, acting on a protein	152	0.00224907	15.185	0.068	Molecular Function	GO:0140096	catalytic activity, acting on a protein	0.00224907	0.0618597	0	0	152	2246
GO:0042974 retinoic acid receptor binding	6	0.0022934	0.599	0.231	Molecular Function	GO:0042974	retinoic acid receptor binding	0.0022934	0.0618597	0	0	6	26
GO:0046982 protein heterodimerization activity	33	0.00230074	3.297	0.092	Molecular Function	GO:0046982	protein heterodimerization activity	0.00230074	0.0618597	0	0	33	359
GO:0031267 small GTPase binding	26	0.00241702	2.597	0.099	Molecular Function	GO:0031267	small GTPase binding	0.00241702	0.0634247	0	0	26	263
GO:0043425 bHLH transcription factor binding	6	0.00281489	0.599	0.222	Molecular Function	GO:0043425	bHLH transcription factor binding	0.00281489	0.0634247	0	0	6	27
GO:0051219 phosphoprotein binding	12	0.0028257	1.199	0.136	Molecular Function	GO:0051219	phosphoprotein binding	0.0028257	0.0634247	0	0	12	88
GO:0000268 peroxisome targeting sequence binding	3	0.00283231	0.3	0.5	Molecular Function	GO:0000268	peroxisome targeting sequence binding	0.00283231	0.0634247	0	0	3	6
GO:0005462 UDP-N-acetylglucosamine transmembrane transporter activity	3	0.00283231	0.3	0.5	Molecular Function	GO:0005462	UDP-N-acetylglucosamine transmembrane transporter activity	0.00283231	0.0634247	0	0	3	6
GO:0004352 glutamate dehydrogenase (NAD+) activity	2	0.00295423	0.2	1	Molecular Function	GO:0004352	glutamate dehydrogenase (NAD+) activity	0.00295423	0.0634247	0	0	2	2
GO:0004353 glutamate dehydrogenase [NAD(P)+] activity	2	0.00295423	0.2	1	Molecular Function	GO:0004353	glutamate dehydrogenase [NAD(P)+] activity	0.00295423	0.0634247	0	0	2	2
GO:0004354 glutamate dehydrogenase (NADP+) activity	2	0.00295423	0.2	1	Molecular Function	GO:0004354	glutamate dehydrogenase (NADP+) activity	0.00295423	0.0634247	0	0	2	2
GO:0005052 peroxisome matrix targeting signal-1 binding	2	0.00295423	0.2	1	Molecular Function	GO:0005052	peroxisome matrix targeting signal-1 binding	0.00295423	0.0634247	0	0	2	2
GO:0008545 JUN kinase kinase activity	2	0.00295423	0.2	1	Molecular Function	GO:0008545	JUN kinase kinase activity	0.00295423	0.0634247	0	0	2	2
GO:0016639 oxidoreductase activity, acting on the CH-NH2 group of donors, NAD or NADP as acceptor	2	0.00295423	0.2	1	Molecular Function	GO:0016639	oxidoreductase activity, acting on the CH-NH2 group of donors, NAD or NADP as acceptor	0.00295423	0.0634247	0	0	2	2
GO:0030158 protein xylosyltransferase activity	2	0.00295423	0.2	1	Molecular Function	GO:0030158	protein xylosyltransferase activity	0.00295423	0.0634247	0	0	2	2
GO:0036461 BLOC-2 complex binding	2	0.00295423	0.2	1	Molecular Function	GO:0036461	BLOC-2 complex binding	0.00295423	0.0634247	0	0	2	2
GO:0016757 transferase activity, transferring glycosyl groups	27	0.00301108	2.697	0.096	Molecular Function	GO:0016757	transferase activity, transferring glycosyl groups	0.00301108	0.0634247	0	0	27	281
GO:0008353 RNA polymerase II CTD heptapeptide repeat kinase activity	4	0.00302658	0.4	0.333	Molecular Function	GO:0008353	RNA polymerase II CTD heptapeptide repeat kinase activity	0.00302658	0.0634247	0	0	4	12
GO:0036002 pre-mRNA binding	7	0.0033784	0.699	0.189	Molecular Function	GO:0036002	pre-mRNA binding	0.0033784	0.0697713	0	0	7	37
GO:0001972 retinoic acid binding	5	0.00367926	0.5	0.25	Molecular Function	GO:0001972	retinoic acid binding	0.00367926	0.0728187	0	0	5	20
GO:0031683 G-protein beta/gamma-subunit complex binding	5	0.00367926	0.5	0.25	Molecular Function	GO:0031683	G-protein beta/gamma-subunit complex binding	0.00367926	0.0728187	0	0	5	20
GO:0061608 nuclear import signal receptor activity	5	0.00367926	0.5	0.25	Molecular Function	GO:0061608	nuclear import signal receptor activity	0.00367926	0.0728187	0	0	5	20
GO:0004693 cyclin-dependent protein serine/threonine kinase activity	6	0.00411733	0.599	0.207	Molecular Function	GO:0004693	cyclin-dependent protein serine/threonine kinase activity	0.00411733	0.0782292	0	0	6	29
GO:0046875 ephrin receptor binding	6	0.00411733	0.599	0.207	Molecular Function	GO:0046875	ephrin receptor binding	0.00411733	0.0782292	0	0	6	29
GO:0097472 cyclin-dependent protein kinase activity	6	0.00411733	0.599	0.207	Molecular Function	GO:0097472	cyclin-dependent protein kinase activity	0.00411733	0.0782292	0	0	6	29
GO:0042169 SH2 domain binding	7	0.0045931	0.699	0.179	Molecular Function	GO:0042169	SH2 domain binding	0.0045931	0.0850706	0	0	7	39
GO:0005048 signal sequence binding	8	0.0045968	0.799	0.163	Molecular Function	GO:0005048	signal sequence binding	0.0045968	0.0850706	0	0	8	49
GO:1990247 N6-methyladenosine-containing RNA binding	3	0.00475667	0.3	0.429	Molecular Function	GO:1990247	N6-methyladenosine-containing RNA binding	0.00475667	0.0869007	0	0	3	7
GO:0003676 nucleic acid binding	251	0.00497528	25.075	0.063	Molecular Function	GO:0003676	nucleic acid binding	0.00497528	0.089744	0	0	251	3997
GO:0003682 chromatin binding	46	0.00538686	4.595	0.08	Molecular Function	GO:0003682	chromatin binding	0.00538686	0.0959535	0	0	46	573
GO:1901505 carbohydrate derivative transmembrane transporter activity	8	0.00664829	0.799	0.154	Molecular Function	GO:1901505	carbohydrate derivative transmembrane transporter activity	0.00664829	0.116961	0	0	8	52
GO:0035257 nuclear hormone receptor binding	16	0.00673844	1.598	0.108	Molecular Function	GO:0035257	nuclear hormone receptor binding	0.00673844	0.117101	0	0	16	148
GO:0003924 GTPase activity	27	0.00721548	2.697	0.09	Molecular Function	GO:0003924	GTPase activity	0.00721548	0.122792	0	0	27	300
GO:0019887 protein kinase regulator activity	19	0.00730646	1.898	0.101	Molecular Function	GO:0019887	protein kinase regulator activity	0.00730646	0.122792	0	0	19	189
GO:0005161 platelet-derived growth factor receptor binding	4	0.00732443	0.4	0.267	Molecular Function	GO:0005161	platelet-derived growth factor receptor binding	0.00732443	0.122792	0	0	4	15
GO:0005154 epidermal growth factor receptor binding	6	0.00798129	0.599	0.182	Molecular Function	GO:0005154	epidermal growth factor receptor binding	0.00798129	0.129493	0	0	6	33
GO:0003872 6-phosphofructokinase activity	2	0.00854201	0.2	0.667	Molecular Function	GO:0003872	6-phosphofructokinase activity	0.00854201	0.129493	0	0	2	3
GO:0004614 phosphoglucomutase activity	2	0.00854201	0.2	0.667	Molecular Function	GO:0004614	phosphoglucomutase activity	0.00854201	0.129493	0	0	2	3
GO:0008427 calcium-dependent protein kinase inhibitor activity	2	0.00854201	0.2	0.667	Molecular Function	GO:0008427	calcium-dependent protein kinase inhibitor activity	0.00854201	0.129493	0	0	2	3
GO:0016309 1-phosphatidylinositol-5-phosphate 4-kinase activity	2	0.00854201	0.2	0.667	Molecular Function	GO:0016309	1-phosphatidylinositol-5-phosphate 4-kinase activity	0.00854201	0.129493	0	0	2	3
GO:0017159 pantetheine hydrolase activity	2	0.00854201	0.2	0.667	Molecular Function	GO:0017159	pantetheine hydrolase activity	0.00854201	0.129493	0	0	2	3
GO:0032795 heterotrimeric G-protein binding	2	0.00854201	0.2	0.667	Molecular Function	GO:0032795	heterotrimeric G-protein binding	0.00854201	0.129493	0	0	2	3
GO:0035651 AP-3 adaptor complex binding	2	0.00854201	0.2	0.667	Molecular Function	GO:0035651	AP-3 adaptor complex binding	0.00854201	0.129493	0	0	2	3
GO:0043183 vascular endothelial growth factor receptor 1 binding	2	0.00854201	0.2	0.667	Molecular Function	GO:0043183	vascular endothelial growth factor receptor 1 binding	0.00854201	0.129493	0	0	2	3
GO:0097718 disordered domain specific binding	6	0.00925568	0.599	0.176	Molecular Function	GO:0097718	disordered domain specific binding	0.00925568	0.138814	0	0	6	34
GO:0046935 1-phosphatidylinositol-3-kinase regulator activity	4	0.00935168	0.4	0.25	Molecular Function	GO:0046935	1-phosphatidylinositol-3-kinase regulator activity	0.00935168	0.138814	0	0	4	16
GO:0045309 protein phosphorylated amino acid binding	8	0.0103767	0.799	0.143	Molecular Function	GO:0045309	protein phosphorylated amino acid binding	0.0103767	0.148393	0	0	8	56
GO:0051427 hormone receptor binding	18	0.0104118	1.798	0.099	Molecular Function	GO:0051427	hormone receptor binding	0.0104118	0.148393	0	0	18	182
GO:0030235 nitric-oxide synthase regulator activity	3	0.0105177	0.3	0.333	Molecular Function	GO:0030235	nitric-oxide synthase regulator activity	0.0105177	0.148393	0	0	3	9
GO:0050815 phosphoserine residue binding	3	0.0105177	0.3	0.333	Molecular Function	GO:0050815	phosphoserine residue binding	0.0105177	0.148393	0	0	3	9
GO:0061575 cyclin-dependent protein serine/threonine kinase activator activity	3	0.0105177	0.3	0.333	Molecular Function	GO:0061575	cyclin-dependent protein serine/threonine kinase activator activity	0.0105177	0.148393	0	0	3	9
GO:0004713 protein tyrosine kinase activity	15	0.0118124	1.499	0.104	Molecular Function	GO:0004713	protein tyrosine kinase activity	0.0118124	0.165026	0	0	15	144
GO:0019199 transmembrane receptor protein kinase activity	15	0.0125357	1.499	0.103	Molecular Function	GO:0019199	transmembrane receptor protein kinase activity	0.0125357	0.173431	0	0	15	145
GO:0070063 RNA polymerase binding	8	0.0127358	0.799	0.138	Molecular Function	GO:0070063	RNA polymerase binding	0.0127358	0.174505	0	0	8	58
GO:0042056 chemoattractant activity	6	0.0139412	0.599	0.162	Molecular Function	GO:0042056	chemoattractant activity	0.0139412	0.187417	0	0	6	37
GO:0061650 ubiquitin-like protein conjugating enzyme activity	6	0.0139412	0.599	0.162	Molecular Function	GO:0061650	ubiquitin-like protein conjugating enzyme activity	0.0139412	0.187417	0	0	6	37
GO:0008301 DNA binding, bending	4	0.0144217	0.4	0.222	Molecular Function	GO:0008301	DNA binding, bending	0.0144217	0.18858	0	0	4	18
GO:0036312 phosphatidylinositol 3-kinase regulatory subunit binding	3	0.0144247	0.3	0.3	Molecular Function	GO:0036312	phosphatidylinositol 3-kinase regulatory subunit binding	0.0144247	0.18858	0	0	3	10
GO:0043208 glycosphingolipid binding	3	0.0144247	0.3	0.3	Molecular Function	GO:0043208	glycosphingolipid binding	0.0144247	0.18858	0	0	3	10
GO:0016758 transferase activity, transferring hexosyl groups	19	0.0149783	1.898	0.094	Molecular Function	GO:0016758	transferase activity, transferring hexosyl groups	0.0149783	0.194037	0	0	19	203
GO:0003711 transcription elongation regulator activity	2	0.0164687	0.2	0.5	Molecular Function	GO:0003711	transcription elongation regulator activity	0.0164687	0.198881	0	0	2	4
GO:0005461 UDP-glucuronic acid transmembrane transporter activity	2	0.0164687	0.2	0.5	Molecular Function	GO:0005461	UDP-glucuronic acid transmembrane transporter activity	0.0164687	0.198881	0	0	2	4
GO:0005463 UDP-N-acetylgalactosamine transmembrane transporter activity	2	0.0164687	0.2	0.5	Molecular Function	GO:0005463	UDP-N-acetylgalactosamine transmembrane transporter activity	0.0164687	0.198881	0	0	2	4
GO:0008457 beta-galactosyl-N-acetylglucosaminylgalactosylglucosyl-ceramide beta-1,3-acetylglucosaminyltransferase activity	2	0.0164687	0.2	0.5	Molecular Function	GO:0008457	beta-galactosyl-N-acetylglucosaminylgalactosylglucosyl-ceramide beta-1,3-acetylglucosaminyltransferase activity	0.0164687	0.198881	0	0	2	4
GO:0010858 calcium-dependent protein kinase regulator activity	2	0.0164687	0.2	0.5	Molecular Function	GO:0010858	calcium-dependent protein kinase regulator activity	0.0164687	0.198881	0	0	2	4
GO:0032184 SUMO polymer binding	2	0.0164687	0.2	0.5	Molecular Function	GO:0032184	SUMO polymer binding	0.0164687	0.198881	0	0	2	4
GO:0034191 apolipoprotein A-I receptor binding	2	0.0164687	0.2	0.5	Molecular Function	GO:0034191	apolipoprotein A-I receptor binding	0.0164687	0.198881	0	0	2	4
GO:1902945 metalloendopeptidase activity involved in amyloid precursor protein catabolic process	2	0.0164687	0.2	0.5	Molecular Function	GO:1902945	metalloendopeptidase activity involved in amyloid precursor protein catabolic process	0.0164687	0.198881	0	0	2	4
GO:0070064 proline-rich region binding	4	0.0174975	0.4	0.211	Molecular Function	GO:0070064	proline-rich region binding	0.0174975	0.209529	0	0	4	19
GO:0003995 acyl-CoA dehydrogenase activity	3	0.0190435	0.3	0.273	Molecular Function	GO:0003995	acyl-CoA dehydrogenase activity	0.0190435	0.226141	0	0	3	11
GO:0004714 transmembrane receptor protein tyrosine kinase activity	13	0.0196315	1.299	0.103	Molecular Function	GO:0004714	transmembrane receptor protein tyrosine kinase activity	0.0196315	0.230268	0	0	13	126
GO:0015932 nucleobase-containing compound transmembrane transporter activity	7	0.0197205	0.699	0.137	Molecular Function	GO:0015932	nucleobase-containing compound transmembrane transporter activity	0.0197205	0.230268	0	0	7	51
GO:0005496 steroid binding	11	0.0198757	1.099	0.11	Molecular Function	GO:0005496	steroid binding	0.0198757	0.230268	0	0	11	100
GO:0031690 adrenergic receptor binding	4	0.0209521	0.4	0.2	Molecular Function	GO:0031690	adrenergic receptor binding	0.0209521	0.238854	0	0	4	20
GO:0035014 phosphatidylinositol 3-kinase regulator activity	4	0.0209521	0.4	0.2	Molecular Function	GO:0035014	phosphatidylinositol 3-kinase regulator activity	0.0209521	0.238854	0	0	4	20
GO:0017124 SH3 domain binding	13	0.023365	1.299	0.101	Molecular Function	GO:0017124	SH3 domain binding	0.023365	0.264247	0	0	13	129
GO:0070410 co-SMAD binding	3	0.0243825	0.3	0.25	Molecular Function	GO:0070410	co-SMAD binding	0.0243825	0.273269	0	0	3	12
GO:0140142 nucleocytoplasmic carrier activity	5	0.0246343	0.5	0.161	Molecular Function	GO:0140142	nucleocytoplasmic carrier activity	0.0246343	0.273269	0	0	5	31
GO:0004879 nuclear receptor activity	7	0.0262471	0.699	0.13	Molecular Function	GO:0004879	nuclear receptor activity	0.0262471	0.273269	0	0	7	54
GO:0098531 transcription factor activity, direct ligand regulated sequence-specific DNA binding	7	0.0262471	0.699	0.13	Molecular Function	GO:0098531	transcription factor activity, direct ligand regulated sequence-specific DNA binding	0.0262471	0.273269	0	0	7	54
GO:0016361 activin receptor activity, type I	2	0.026464	0.2	0.4	Molecular Function	GO:0016361	activin receptor activity, type I	0.026464	0.273269	0	0	2	5
GO:0016717 oxidoreductase activity, acting on paired donors, with oxidation of a pair of donors resulting in the reduction of molecular oxygen to two molecules of water	2	0.026464	0.2	0.4	Molecular Function	GO:0016717	oxidoreductase activity, acting on paired donors, with oxidation of a pair of donors resulting in the reduction of molecular oxygen to two molecules of water	0.026464	0.273269	0	0	2	5
GO:0031698 beta-2 adrenergic receptor binding	2	0.026464	0.2	0.4	Molecular Function	GO:0031698	beta-2 adrenergic receptor binding	0.026464	0.273269	0	0	2	5
GO:0035594 ganglioside binding	2	0.026464	0.2	0.4	Molecular Function	GO:0035594	ganglioside binding	0.026464	0.273269	0	0	2	5
GO:0035650 AP-1 adaptor complex binding	2	0.026464	0.2	0.4	Molecular Function	GO:0035650	AP-1 adaptor complex binding	0.026464	0.273269	0	0	2	5
GO:0070095 fructose-6-phosphate binding	2	0.026464	0.2	0.4	Molecular Function	GO:0070095	fructose-6-phosphate binding	0.026464	0.273269	0	0	2	5
GO:0097109 neuroligin family protein binding	2	0.026464	0.2	0.4	Molecular Function	GO:0097109	neuroligin family protein binding	0.026464	0.273269	0	0	2	5
GO:1990269 RNA polymerase II C-terminal domain phosphoserine binding	2	0.026464	0.2	0.4	Molecular Function	GO:1990269	RNA polymerase II C-terminal domain phosphoserine binding	0.026464	0.273269	0	0	2	5
GO:0030332 cyclin binding	5	0.0279299	0.5	0.156	Molecular Function	GO:0030332	cyclin binding	0.0279299	0.284287	0	0	5	32
GO:0043548 phosphatidylinositol 3-kinase binding	5	0.0279299	0.5	0.156	Molecular Function	GO:0043548	phosphatidylinositol 3-kinase binding	0.0279299	0.284287	0	0	5	32
GO:0005080 protein kinase C binding	7	0.0287147	0.699	0.127	Molecular Function	GO:0005080	protein kinase C binding	0.0287147	0.290202	0	0	7	55
GO:0030331 estrogen receptor binding	6	0.0307672	0.599	0.136	Molecular Function	GO:0030331	estrogen receptor binding	0.0307672	0.308723	0	0	6	44
GO:0001227 DNA-binding transcription repressor activity, RNA polymerase II-specific	25	0.0321518	2.498	0.081	Molecular Function	GO:0001227	DNA-binding transcription repressor activity, RNA polymerase II-specific	0.0321518	0.308723	0	0	25	310
GO:0002039 p53 binding	8	0.0330939	0.799	0.116	Molecular Function	GO:0002039	p53 binding	0.0330939	0.308723	0	0	8	69
GO:0035258 steroid hormone receptor binding	9	0.0336951	0.899	0.11	Molecular Function	GO:0035258	steroid hormone receptor binding	0.0336951	0.308723	0	0	9	82
GO:0061631 ubiquitin conjugating enzyme activity	5	0.0353261	0.5	0.147	Molecular Function	GO:0061631	ubiquitin conjugating enzyme activity	0.0353261	0.308723	0	0	5	34
GO:0005545 1-phosphatidylinositol binding	3	0.037214	0.3	0.214	Molecular Function	GO:0005545	1-phosphatidylinositol binding	0.037214	0.308723	0	0	3	14
GO:0032183 SUMO binding	3	0.037214	0.3	0.214	Molecular Function	GO:0032183	SUMO binding	0.037214	0.308723	0	0	3	14
GO:0004715 non-membrane spanning protein tyrosine kinase activity	6	0.0372901	0.599	0.13	Molecular Function	GO:0004715	non-membrane spanning protein tyrosine kinase activity	0.0372901	0.308723	0	0	6	46
GO:0004791 thioredoxin-disulfide reductase activity	2	0.0382798	0.2	0.333	Molecular Function	GO:0004791	thioredoxin-disulfide reductase activity	0.0382798	0.308723	0	0	2	6
GO:0004936 alpha-adrenergic receptor activity	2	0.0382798	0.2	0.333	Molecular Function	GO:0004936	alpha-adrenergic receptor activity	0.0382798	0.308723	0	0	2	6
GO:0005167 neurotrophin TRK receptor binding	2	0.0382798	0.2	0.333	Molecular Function	GO:0005167	neurotrophin TRK receptor binding	0.0382798	0.308723	0	0	2	6
GO:0005168 neurotrophin TRKA receptor binding	2	0.0382798	0.2	0.333	Molecular Function	GO:0005168	neurotrophin TRKA receptor binding	0.0382798	0.308723	0	0	2	6
GO:0034190 apolipoprotein receptor binding	2	0.0382798	0.2	0.333	Molecular Function	GO:0034190	apolipoprotein receptor binding	0.0382798	0.308723	0	0	2	6
GO:1990254 keratin filament binding	2	0.0382798	0.2	0.333	Molecular Function	GO:1990254	keratin filament binding	0.0382798	0.308723	0	0	2	6
GO:0008376 acetylgalactosaminyltransferase activity	6	0.0408585	0.599	0.128	Molecular Function	GO:0008376	acetylgalactosaminyltransferase activity	0.0408585	0.308723	0	0	6	47
GO:0003727 single-stranded RNA binding	9	0.0437635	0.899	0.105	Molecular Function	GO:0003727	single-stranded RNA binding	0.0437635	0.308723	0	0	9	86
GO:0019215 intermediate filament binding	3	0.0446864	0.3	0.2	Molecular Function	GO:0019215	intermediate filament binding	0.0446864	0.308723	0	0	3	15
GO:0033218 amide binding	28	0.0474788	2.797	0.076	Molecular Function	GO:0033218	amide binding	0.0474788	0.308723	0	0	28	369
GO:0032182 ubiquitin-like protein binding	10	0.0478913	0.999	0.099	Molecular Function	GO:0032182	ubiquitin-like protein binding	0.0478913	0.308723	0	0	10	101
GO:1902936 phosphatidylinositol bisphosphate binding	11	0.0484286	1.099	0.096	Molecular Function	GO:1902936	phosphatidylinositol bisphosphate binding	0.0484286	0.308723	0	0	11	115
GO:0005501 retinoid binding	5	0.0484931	0.5	0.135	Molecular Function	GO:0005501	retinoid binding	0.0484931	0.308723	0	0	5	37
GO:0019840 isoprenoid binding	5	0.0484931	0.5	0.135	Molecular Function	GO:0019840	isoprenoid binding	0.0484931	0.308723	0	0	5	37
